# Supplementary material for: Intrinsically disordered proteins in PubMed: what can the tip of the iceberg tell us about what lies below?
Source: Royal Society of Chemistry journal article supplement (doi:10.1039/c5ra24866c), 2016-01-01
Supplement: c5ra24866c2.xlsx [file c5ra24866c2.xlsx]

## Sheet: SwissProt
	0-10%	10-20%	20-30%	30-40%	40-50%	50-60%	60-70%	70-80%	80-90%	90-100%
eukaryote
>5	0.122596	0.146285	0.172139	0.179769	0.197448	0.173523	0.162987	0.120491	0.0516129	0.0538922
2-5	0.417314	0.398874	0.384881	0.390848	0.403016	0.380952	0.36449	0.313891	0.243318	0.22284
1	0.324795	0.327365	0.317303	0.298789	0.280449	0.309648	0.345233	0.424405	0.589862	0.607357
0	0.135296	0.127475	0.125676	0.130595	0.119088	0.135876	0.12729	0.141213	0.115207	0.115911
bacteria
>5	0.00910274	0.00944138	0.00797312	0.00718442	0.00568259	0.00700809	0.00724234	0.00188147	0.0046225	0.00500385
2-5	0.113102	0.112132	0.0996969	0.0967742	0.093898	0.1	0.0991643	0.0903104	0.0970724	0.0777521
1	0.630116	0.605015	0.605166	0.603276	0.63212	0.614825	0.618942	0.629351	0.637904	0.618553
0	0.247679	0.273412	0.287164	0.292765	0.268299	0.278167	0.274652	0.278457	0.260401	0.298691
archaea
>5	0.00450135	0.00471884	0.00657501	0.0109223	0.0260116	0.0234742	0.0196078	0.0465116	0	0.0731707
2-5	0.140742	0.140385	0.139868	0.139563	0.104046	0.131455	0.147059	0.232558	0.217391	0.0731707
1	0.70051	0.723358	0.721458	0.682039	0.728324	0.633803	0.72549	0.651163	0.652174	0.560976
0	0.154246	0.131538	0.132098	0.167476	0.141618	0.211268	0.107843	0.0697674	0.130435	0.292683
virus
>5	0.0407077	0.0416764	0.036965	0.0565635	0.0405644	0.0760234	0.0169492	0.0314961	0.05	0.0416667
2-5	0.356924	0.326426	0.31177	0.328709	0.335097	0.356725	0.39548	0.417323	0.375	0.319444
1	0.496209	0.529686	0.551556	0.546425	0.546737	0.523392	0.497175	0.464567	0.425	0.5
0	0.106159	0.102212	0.0997082	0.0683031	0.0776014	0.0438596	0.0903955	0.0866142	0.15	0.138889

## Sheet: Search
UniProt	RAPID score(s)	Disprot	Search Term	IDP PMIDs	num IDP PMIDs	num all PMIDs	fract IDP PMIDs
Q95V77	97.2	DP00186	Aavlea1	12569097, 21909508	2	6	0.333333
P00519	30.8	x	ABL tyrosine kinase	17211892, 22632137	2	9588	0.000208594
Q08655	90.43	DP00531	(“Abscisic acid stress ripening” OR “Abscisic acid-, stress-, and ripening-induced“)	17189335, 23470734	2	11	0.181818
P07342	12.95	DP00398	Acetolactate synthase catalytic subunit AND mitochondria*	11902841	1	3	0.333333
P07140	2.62	DP00346	Acetylcholinesterase	10892800	1	22467	4.45097e-05
P22303	3.42	x	acetylcholinesterase variant AND AChE-R	20173328, 23908786	2	60	0.0333333
Q00955	4.93	DP00557	Acetyl-CoA carboxylase	15341732	1	3789	0.000263922
P15891	58.11	DP00634	("actin-binding protein")	11668184, 16110343, 19590096	3	2248	0.00133452
Q9Y6Q9	36.94	x	ACTR	11823864, 20556825, 21766125, 21894929, 21898648, 22253588, 23327569, 23373423, 23586525, 23758617, 23799450, 24449148, 24811666	13	283	0.0459364
Q9YBQ2	4.47	DP00248	Acylamino-acid-releasing enzyme	15296741	1	115	0.00869565
P0A6A8	55.13	DP00416	Acyl carrier protein AND e. coli	12057197	1	1139	0.000877963
P55336	3.69	x	(“acyl carrier protein” AND “Vibrio harveyi“)	17604643, 18059524, 18060858, 18773978	4	32	0.125
Q97ZL0	15.84	DP00513	acylphosphatase AND Sulfolobus solfataricus	14724277, 16287076	2	17	0.117647
E2IJZ8	2.58	x	Ad41	16254343	1	132	0.00757576
P46108	28.29	DP00748, DP00748_A002	Adapter molecule crk	12384576, 17515907	2	27	0.0740741
P25054	37.88	DP00519	Adenomatous polyposis coli protein	16293619, 16753179, 21859464, 24130866	1	2839	0.000352237
P03255	43.94	x	adenovirus early region 1A	23783631	1	249	0.00401606
P0DKX7	6.74	DP00591	(“adenylate cyclase” OR CyaA) AND bordetella pertussis	2522624, 19015266, 19860484, 20096704, 21112299, 21416544, 21454565, 23941183, 24145447	10	1798	0.00556174
Q9UJY5	29.11	DP00314	ADP-ribosylation factor-binding protein GGA1	12668765, 12679809, 12767220	3	17	0.176471
P07248	9.07	DP00077	ADR1 regulatory protein	3515197, 9642072	2	52	0.0384615
P42568	52.82	x	AF9	23260655	1	286	0.0034965
P16112	23.85	x	aggrecan AND CS-attachment region AND chondroitin sulfate	20806220	1	5	0.2
O95994	18.86	x	AGR2	23780840	1	159	0.00628931
P24588	60.42	x	(AKAP79 OR AKAP5)	16442664	1	230	0.00434783
Q02952	60.44	x	(AKAP250 OR AKAP12 OR AKAP gravin)	16442664, 16762919	2	186	0.0107527
Q8LBP4	17.97	DP00662	(Alb3 OR A3CT OR ALBINO3)	20018841	1	91	0.010989
P05091	11.03	DP00383	Aldehyde dehydrogenase AND mitochondria*	15983043	1	1226	0.000815661
P53954	0.73	DP00618	ALG11	11846551, 12538870, 15653326, 16037492, 19929855	5	19	0.263158
P77072	8.96	DP00575	Alkylmercury lyase	15222745	1	29	0.0344828
P78318	35.4	x	alpha4	22194938	1	3804	0.000262881
P35611	33.65	DP00240	Alpha-adducin	7642559	1	583	0.00171527
P02959	37.1	x	alpha/beta AND (SASP OR small acid soluble) AND protein	24029407	1	103	0.00970874
P02489	10.4	DP00444	Alpha-crystallin A chain	9650074, 12235146	2	240	0.00833333
P02511	18.86	DP00445	Alpha-crystallin B chain	9650074, 12235146	2	700	0.00285714
P09983	9.48	DP00389	(alpha hemolysin OR HlyA) AND Escherichia coli	7703231, 17407262	2	1085	0.00184332
P00709	16.9	x	alpha lactalbumin AND HAMLET	20977665	1	77	0.012987
P02662	32.71	DP00330	(alpha S1 OR alpha s) AND casein	7305393, 18155889, 18700180, 20025277, 21689790, 22155633	6	625	0.0096
P02549	17.98	x	alpha spectrin AND (N-terminal or N-terminus)	23200054, 24055379	2	212	0.00943396
P37840	43.57	DP00070	(“alpha synuclein”)	8901511, 9264546, 10942772, 10978144, 11152691, 11425308, 11560511, 11604526, 11734199, 11734201, 11784308, 11812782, 12032141, 12062445, 12428728, 12534279, 12586824, 12621030, 12649428, 12667059, 12754258, 12815044, 12834338, 12956606, 14982446, 15005622, 15096050, 15103328, 15643843, 15671169, 15744056, 15790533, 15925383, 15939304, 16081040, 16092089, 16162499, 16197548, 16223878, 16305213, 1…	218	6160	0.0353896
P09493	57.39	x	alpha tropomyosin AND (N-terminal OR N-terminus)	11575936, 21584876, 22754618, 23052974	4	324	0.0123457
Q71U36	9.76	x	alpha Tubulin	24835459, 25307498	2	25523	7.83607e-05
Q86925	8.28	x	alphavirus capsid protease AND (C-terminal or C-terminus)	25100849	1	12	0.0833333
Q9NP70	38.03	x	ameloblastin	18353005, 22243255, 23782691	3	217	0.0138249
P63277, P45561	48.57, 53.97	DP00692, DP00692_A001, DP00692_A002, DP00693	amelogenin	19081741, 19086270, 19236004, 20304108, 21351181, 24114119, 25298002	7	1577	0.00443881
P0AG16	6.73	DP00578	Amidophosphoribosyltransferase	9914248	1	237	0.00421941
P05067	18.57	x	(amyloid beta OR Abeta OR APP OR “amyloid precursor protein”)	12149256, 15925383, 16197548, 17534931, 18059284, 18511942, 18625543, 19208933, 19260715, 19540204, 20036826, 20306540, 20336261, 20385841, 20483339, 20598937, 20709081, 21056574, 21209058, 21354340, 21376731, 21797254, 21985427, 22155633, 22270944, 22674434, 22828513, 22952038, 23145167, 23421682, 23484883, 23561531, 23640306, 23679641, 23798407, 23811057, 23883055, 24028075, 24077017, 24131107,…	45	47039	0.000956653
Q99BV0	2.28	x	Andes virus Gn tail	22203819	1	13	0.0769231
P10275	21.65	DP00492	androgen receptor AND NH2	11896058, 15023052, 15107424, 23722902	4	87	0.045977
Q01484	34.24	DP00467	Ankyrin-2	16368689	1	21	0.047619
P49913	11.18	DP00004, DP00004_C002	Antibacterial protein LL-37	9452503	1	223	0.0044843
P03045	67.29	DP00005	Antitermination protein N	9659923	1	230	0.00434783
Q9BP37	10.23	DP00714	AP7 AND nacre	19159266, 24837160, 24977921	3	8	0.375
P84092	5.75	DP00455	AP-2 complex subunit mu	12086608	1	67	0.0149254
B0FRH7	100.0	DP00544	(Aplysia nucleolar protein OR ApLLP)	18078811	1	5	0.2
P02647	20.97	DP00386, DP00386_C001	apolipoprotein A-I	12062424, 15476409	2	9783	0.000204436
P02649	25.87	DP00355	Apolipoprotein E	2063194, 10850798	2	19057	0.000104948
P02628	32.41	DP00550	(apo-parvalbumin OR (“apo form” AND parvalbumin))	18260106, 19651438	2	17	0.117647
P93025	26.23	x	Arabidopsis phototropin 2	21222437	1	112	0.00892857
x	x	x	aragonite associated biomineralization proteins	23060620	1	35	0.0285714
Q9BP38	14.04	DP00715	Aragonite protein AP24	14648763, 15222016	2	3	0.666667
P42684	21.91	x	ARG tyrosine kinase	17211892	1	88	0.0113636
P32120	18.1	x	arrestin2	19710023	1	330	0.0030303
P35869, Q9WTL8	10.73, 25.0	DP00381, DP00735_A004	Aryl hydrocarbon receptor	15641800, 22653727	2	6732	0.000297089
Q13625	35.02	x	ASPP2	18448430	1	83	0.0120482
P54252	37.09	DP00576	ataxin-3	15265035, 23891935	2	355	0.0056338
Q9SQZ9	14.77	DP00434	At3g04780	15741346	1	1	1
Q06628	34.82	x	Atg13	23670046, 25139988	2	95	0.0210526
Q12092	33.8	x	Atg29	23858448	1	16	0.0625
P40344	21.94	x	Atg3	24879155	1	142	0.00704225
P53104	17.5	x	Atg1	25139988	1	235	0.00425532
P02721	31.48	DP00201	ATP synthase-coupling factor 6 AND mitochondria*	15327958	1	4	0.25
P01160	29.41	DP00747, DP00747_C002	Atrial natriuretic peptide	8043577, 16870210, 21508037, 23110718	4	18856	0.000212134
Q27974	25.05	DP00351	auxilin phosphatase	12732633	1	21	0.047619
O15169	31.32	x	(axin OR axin1)	16293619, 21087614, 23603389	3	1100	0.00272727
P05408	39.15	x	7B2	22947085	1	288	0.00347222
P37957	2.36	x	bacillus lipase	25001212	1	459	0.00217865
P07740	9.58	x	bacterial luciferase AND mobile loop	11827516, 19435287, 19710008, 21156144	4	4	1
P26747	8.37	DP00268	bacteriophage p22 coat protein	15784254	1	113	0.00884956
P16009	8.17	DP00284	bacteriophage T4 tail lysozyme	15701513	1	15	0.0666667
O95817	51.83	x	Bag3	21767525	1	219	0.00456621
P46379	27.92	x	Bag6	23665563	1	81	0.0123457
x	x	x	(basic region leucine zipper OR bZIP)	22226835	1	2952	0.000338753
P10163	100.0	DP00119	(Basic salivary proline-rich protein 4 OR IB5 salivary protein)	4093242, 16529944, 17503833, 19402144, 19838685, 20643086, 20665010, 21524106	8	42	0.190476
P80723	100.0	x	BASP1	23520002, 23821606	2	98	0.0204082
O50835	37.85	DP00354	BBK32	15292204	1	39	0.025641
P11912	4.87	DP00502	B cell receptor AND Igalpha	14967045, 17176095, 21487502, 24769851	4	106	0.0377358
P40259	10.92	DP00503	B cell receptor AND Igbeta	14967045, 17176095, 21487502, 24769851	4	101	0.039604
P10415	17.15	DP00297	Bcl-2 AND apoptosis	15733859, 23272207	2	37605	5.31844e-05
Q61337	63.73	DP00563	bcl2 antagonist of cell death	11206074, 16645638	2	1472	0.0013587
O43521, O43521-2	35.86, 57.97	DP00643, DP00643_A002	(bcl-2-like protein 11 OR BCL2L11)	16645638	1	1327	0.00075358
Q91ZE9	34.59	DP00645	Bcl-2-modifying factor	16645638	1	22	0.0454545
Q07817	15.88	DP00298	(Bcl-xL OR "Bcl-2-like protein 1") AND human	8692274, 9346936, 14534311	3	4497	0.000667111
P53563	26.18	DP00449	(Bcl-xL OR "Bcl-2-like protein 1") AND rat	9346936	1	926	0.00107991
P23560	13.77	x	(BDNF OR "brain derived neurotrophic factor")	24048383	1	14751	6.7792e-05
Q14457	18.22	x	BECN1	24115198	1	1231	0.000812348
P35612	38.98	DP00241	Beta-adducin	7642559	1	583	0.00171527
P17870	20.33	DP00390	Beta-arrestin-1	11566136, 19710023	2	1906	0.00104932
P02666, P05814	30.36, 25.66	DP00329, DP00199	Beta casein	2387396, 7305393, 7979373, 8373815, 11784308, 18155889, 18303844, 18327957, 18336901, 18700180, 19322774, 21689790, 24918971, 25144497, 25227946	15	12216	0.0012279
P46170	13.16	DP00209	Beta-defensin 12	7577957	1	338	0.00295858
Q62165	27.21	DP00491, DP00491_C002	beta dystroglycan	14622018, 15295116	2	1363	0.00146735
A0A0E1V051, Q2SHN6	3.85, 13.78	x	Betagamma-crystallin	15536081, 20929244, 21549498, 22836948, 24671380	5	75	0.0666667
P02754	15.73	DP00193	Beta-lactoglobulin	9141136	1	8488	0.000117813
P11277	17.36	x	beta spectrin AND (C-terminal or C-terminus)	23200054, 24055379	2	248	0.00806452
Q16143	56.72	DP00555	(“beta synuclein”)	10942772, 11812782, 12667059, 15966733, 17681539, 18436957, 19081538, 23526115, 24489820	9	1276	0.00705329
P17120	25.08	DP00636	BimC	14530265	1	81	0.0123457
O54918	44.9	DP00518	BimL	16645638, 21378313, 24974286	3	47	0.0638298
P0ABE0	25.64	DP00415	Biotin carboxyl carrier protein of acetyl-CoA carboxylase	11956202	1	146	0.00684932
P96884, P06709	8.65, 5.61	DP00695, DP00349	BirA bifunctional protein	1409631, 10497026, 11124029, 20169168	4	18	0.222222
P9WIC8	12.85	DP00295	2,3-bisphosphoglycerate-dependent phosphoglycerate mutase	15735341	1	9	0.111111
Q2YPE7	14.61	x	(BMFP OR Brucella abortus MFP )	18616282	1	4	0.25
Q9FUM5	69.23	DP00216	BN28a	9046590	1	2	0.5
P21815	60.25	DP00332	Bone sialoprotein 2	11162539	1	971	0.00102987
Q53HL2	39.29	x	Borealin	19146389	1	79	0.0126582
P06748	53.4	x	(B23 OR Nucleophosmin OR NPM1) AND RNA	24106084, 24576674, 24952945	3	614	0.00488599
Q00496	1.36	DP00732_C001	Botulinum neurotoxin	15157097	1	12550	7.96813e-05
A0JNH0	57.54	x	bovine dentin phosphophoryn	15892946, 16000119	2	38	0.0526316
P19711	0.65	DP00675_C002	(bovine viral diarrhea virus core OR (BVDV AND bovine))	18032507, 18033802	2	1937	0.00103252
P19711	0.65	DP00675	bovine viral diarrhea virus poly protein	18033802	1	17	0.0588235
Q9SIN5	43.97	DP00743	(15b protein OR COR15b)	20510170, 25096979	2	350	0.00571429
D0V3W5	37.94	x	BQP35	22317784	1	1	1
P01042	22.67	x	bradykinin OR kininogen domain 5	19272336, 21355573, 24810540	3	16948	0.000177012
P38398	38.06	DP00238	BRCA1	15571721, 15609993, 24303310	3	11054	0.000271395
Q9XTN4	40.34	x	(Brinker OR apo-brinker)	21088782	1	975	0.00102564
P81019	21.31	DP00669	BSP-30	10377061, 20331968	2	36	0.0555556
P00864	12.46	x	(BTPC OR bacterial type phosphoenolypyruvate carboxylase)	21524275, 22404138, 22569262, 24266766	4	25	0.16
G2WDT1	80.08	x	Bud13p	18809678	1	8	0.125
P04873	13.19	x	bunyavirus nucleocapsid protein	16428606	1	127	0.00787402
Q9SG86	19.56	x	bZIP28	23624714	1	25	0.04
P09803	10.86	DP00159	Cadherin-1	11121423	1	17095	5.84966e-05
Q9JP55	20.55	x	CagA AND (C-terminal OR C-terminus)	22817985, 24223932, 25116152	3	64	0.046875
P63098	8.82	DP00565	Calcineurin AND (subunit B type 1 OR regulatory subunit)	7498455, 8142351, 8524402, 12357034, 17498738, 22100452	6	296	0.0202703
P01263	31.62	x	calcitonin AND salmon	23208874	1	1841	0.000543183
P28583	15.55	DP00561	calcium-dependent protein kinase SK5	15568805	1	1	1
Q9CXW3	33.62	DP00226	Calcyclin-binding protein	15996101	1	59	0.0169492
P12957	91.7	DP00120	caldesmon	14635127	1	5222	0.000191498
P62152	36.24	DP00344	Calmodulin	1606151, 1909892, 15099569, 19190183	4	38337	0.000104338
P40136	21.5	DP00395	Calmodulin-sensitive adenylate cyclase	11807546	1	94	0.0106383
P20810	78.39	DP00196	Calpastatin	2407243, 9366272, 14500891, 15751971, 18519038, 18537264, 19020623, 19378261	8	1258	0.0063593
P51911	26.94	x	calponin AND (“regulatory region” OR (N-terminus OR N-terminal))	21463585, 22424482	2	171	0.0116959
P27797	35.01	DP00333	Calreticulin	11101311	1	2412	0.000414594
Q9QXT8	21.48	DP00291	Calsenilin	15746104	1	395	0.00253165
P07221	19.75	DP00132	Calsequestrin	4472093, 6480588, 6725251, 9628486, 25091206	5	1038	0.004816
P61926	48.68	DP00015	cAMP-dependent protein kinase inhibitor alpha	1862343, 2040607	2	1334	0.00149925
P00514	16.05	DP00245	cAMP-dependent protein kinase type I-alpha regulatory subunit	6487597, 15692043	2	38	0.0526316
P50477	10.11	DP00436	Canavalin	8310056	1	55	0.0181818
P40881	6.07	DP00110	Carbonic anhydrase	10924115	1	10911	9.16506e-05
P31896	5.48	DP00239	Carbon monoxide dehydrogenase	11593006	1	444	0.00225225
Q3AB29	4.15	x	(carbon monoxide oxidation activator OR CooA)	22544803	1	110	0.00909091
P43155	6.55	DP00305	Carnitine O-acetyltransferase	12562770	1	373	0.00268097
P38582	9.01	DP00380	carnobacteriocin-B2 immunity protein	15362858	1	10	0.1
Q8WXD9	43.12	x	(CASK-interactive protein1 OR Caskin-1)	19523119	1	2	0.5
Q02248	16.39	DP00341	Catenin beta-1	9298899, 15629534	2	122	0.0163934
Q9UBX1	6.82	x	cathepsin F	23684953	1	59	0.0169492
Q9Y3M2	30.95	DP00709	(Cby OR Chibby)	21182262	1	257	0.00389105
P62552	25.0	x	CcdA AND antitoxin AND (C-terminal OR C-terminus)	17007877, 19647513, 23289531	3	4	0.75
Q9Y258	8.51	DP00696	ccl26	11425309	1	216	0.00462963
C1K010	69.0	x	C4 Cotton leaf curl Kokhran virus	23500017	1	2	0.5
P49585	29.7	x	(CCT OR phosphocholine cytidylyltransferase) AND alpha	21303909	1	325	0.00307692
Q9Y5K3	31.44	x	(CCT OR phosphocholine cytidylyltransferase) AND beta	21303909	1	328	0.00304878
O14519	33.91	x	CDK2AP1	22427660	1	62	0.016129
Q49AH0	12.3	x	CDNF	22528768	1	39	0.025641
Q15517	52.36	DP00706	(CDSN OR corneodesmosin)	20448140	1	141	0.0070922
P35638	73.37	DP00624	(“C/EBP homologous protein”)	18534616, 22496840	2	2273	0.000879894
G0RVK1	19.07	x	Cel7a	21112302	1	163	0.00613497
E1WAC6	23.8	DP00157	Cell invasion protein sipA	14512630	1	54	0.0185185
P29762	11.68	x	Cellular retinoic acid-binding protein 1	15907702	1	551	0.00181488
Q03701	27.8	x	(C/EPB OR CCAAT enhancer binding protein)	17102635	1	9824	0.000101792
Q12798	44.19	x	CETN1	24252580	1	9	0.111111
P01100	44.21	DP00078	(c-Fos AND (C-terminal OR C-terminus OR “activation domain”))	10704222, 11749217, 20498278, 22301802	4	832	0.00480769
Q9VZI1	18.09	x	Chd64	24805353	1	3	0.333333
P07363	7.65	DP00407	Chemotaxis protein cheA	8639521	1	421	0.0023753
Q56311	5.96	DP00350	Chemotaxis protein cheW	11799399, 12488014	2	244	0.00819672
Q9Y3E7	53.15	x	CHMP3	21220121	1	44	0.0227273
P01555	6.2	DP00250	cholera enterotoxin subunit A	7669757, 15049684	2	51	0.0392157
P01233	23.03	DP00013	Choriogonadotropin subunit beta	8202136	1	4569	0.000218866
Q57696	23.23	DP00465	chorismate mutase AroQ	9506949, 15322276	2	25	0.08
P05059	67.48	DP00118	Chromogranin-A	3473966, 8243650	2	4460	0.00044843
P40019	88.24	x	Chz1	22807669	1	11	0.0909091
O08785	23.39	DP00734	Circadian locomoter output cycles protein kaput	22653727	1	3	0.333333
Q99967	39.63	DP00356	(CITED2 OR CIT-ED2 OR Cbp/p300-interacting transactivator 2)	14594809	1	169	0.00591716
P05412	33.23	x	cJun	12437352	1	398	0.00251256
O75122	17.23	x	(CLASP2 OR cytoplasmic linker associated protein 2)	22467876	1	291	0.00343643
Q05140	36.72	DP00225	Clathrin coat assembly protein AP180	11756460	1	174	0.00574713
Q68FX6	55.13	x	(CLPH OR casein like phosphoprotein)	19271754	1	770	0.0012987
P05371	25.28	DP00014	clusterin	11570883	1	2078	0.000481232
O75444	23.06	x	c-Maf	25220806	1	397	0.00251889
Q708E1	45.42	x	C-myb AND “transactivation domain”	23026051, 23875714, 23980173, 24753318	4	210	0.0190476
Q14896	15.93	x	(CMyBP-C OR cardiac myosin binding protein)	17876814, 22004751	2	2450	0.000816327
P01106	42.14	DP00260	c-myc AND oncoprotein	8755740, 15663936, 19022175, 19432426, 20598937, 22399317, 22457068, 22815918, 24098099	9	12286	0.000732541
P62633	11.3	x	CNBP	24161561	1	166	0.0060241
Q02388	37.02	x	Col7	24810542	1	22	0.0454545
P09883	36.94	DP00342	(“colicin E9” OR colE9)	12054823, 16114886, 16166265, 16894158, 17375930, 18408035, 19021565, 20687482, 21098297, 22310049, 23176512, 23812713	12	111	0.108108
P08083	21.71	DP00461	("colicin N")	9680221, 9687368, 11099384, 12679333, 15004032, 15465872, 17375930, 18573254, 19306883, 20687482, 21098297, 23176512, 23672584	13	51	0.254902
Q53654	49.11	DP00098	Collagen adhesin	8218209, 9334749	2	397	0.00503778
P02458	57.7	DP00274	Collagen alpha-1(II) chain	15466413	1	367	0.0027248
O14810	90.3	x	complexin	21481779	1	238	0.00420168
P17302	20.16	x	(connexin43 OR “connexin 43” OR cx43) AND cytoplasmic	18411056, 18649183, 19808665, 23828237	4	728	0.00549451
P36383	30.56	x	(connexin45 OR Cx45)	24853747	1	461	0.0021692
P08034	10.95	x	(connexin32 OR Cx32)	22718765	1	986	0.0010142
P36382	20.67	x	(connexin40 OR Cx40CT)	19808665	1	239	0.0041841
Q7Z094	15.22	x	Conotoxin iota-RXIA	17696362	1	3	0.333333
Q6PJW8	34.48	x	Consortin	19864490	1	2	0.5
x	x	x	Convicilins	18545275	1	4	0.25
Q04656	7.0	DP00282	Copper-transporting ATPase 1	14572476, 15035611	2	107	0.0186916
Q42512	45.32	DP00536	COR15A	20510170, 25096979	2	83	0.0240964
Q53SF7	45.18	x	(cordon-bleu OR Cobl)	24415668	1	57	0.0175439
Q9NR00	30.19	DP00372	(C8orf4 OR “Thyroid Cancer 1” OR TC-1)	15087392, 17905836, 23189168, 23880650, 24941347	5	21820	0.000229148
Q12287	47.83	DP00277	Cox17	15465825, 23060071, 23106082	3	103	0.0291262
Q9LZP9, A6Q0K5	47.33, 24.3	DP00534, DP00359	CP12 AND protein AND calvin	12846565, 15047759, 16427344, 17947231, 19456123, 20224939, 21271977, 22153507, 22514274, 22955105, 22988853, 24056937, 24523724, 24863370	14	39	0.358974
Q9HC77	48.95	x	(CPAP OR CENPJ) AND PN2-3	19131341	1	2	0.5
P00736	3.26	DP00621	c1R AND CUB2 domain	20178990	1	8	0.125
P45481	32.28	DP00348	(CREB-binding protein OR CBP)	11823864, 18565542, 19278259, 19894758, 20616042, 20949632, 20969867, 21268115, 21766125, 21892446, 22174264, 22253588, 22280219, 22506277, 22829760, 23307074, 23327569, 23373423, 23586525, 23799450, 23822324, 23875714, 23980173, 24253305, 24446368, 24449148, 24970129, 25002472, 25049401, 25092343, 25215518	31	12497	0.0024806
P15337	33.72	DP00682, DP00080	(CREB-1 OR Cyclic AMP-responsive element-binding protein 1)	9413984, 19278259, 19894758, 20949632, 21268115, 22506277, 23822324, 24446368, 24970129, 25215518	10	5167	0.00193536
Q91WR5	4.33	DP00690	C21 reductase	20124700	1	215	0.00465116
Q49AN0	17.37	DP00473	cryptochrome 2	15751956, 21841916	2	548	0.00364964
Q43125	18.94	DP00474	cryptochrome 1	16164372	1	665	0.00150376
B2CY49	50.0	x	CsGA	22493266	1	246	0.00406504
Q548S0	11.26	x	CsGB	22493266	1	49	0.0204082
P41240	4.89	x	c-Src kinase AND (N-terminal or N-terminus)	19520085, 23744817	2	73	0.0273973
Q76LA1	28.57	DP00511	CSTB protein	16155205	1	245	0.00408163
Q9Z2F5	12.79	DP00499	CtBP AND (C-terminal or C-terminus)	16597837	1	269	0.00371747
Q6Q4B0	18.81	x	cucumber mosaic virus cucumovirus coat	20056465	1	141	0.0070922
O94316	8.74	x	cwf10	24014766	1	1	1
P14635	26.79	DP00223	cyclin B AND G2	12220679	1	1466	0.000682128
Q64364, Q8N726	27.81, 69.7	DP00335, DP00336	Cyclin-dependent kinase inhibitor 2A	11718560, 12630860	2	6615	0.000302343
P46527	54.55	DP00018	(Cyclin-dependent kinase inhibitor 1B OR p27(Kip1) OR p27)	8684460, 11749217, 11790096, 12697905, 15024385, 15609350, 16214166, 16458085, 17426451, 18177895, 18627125, 21715330, 22080214, 22276948, 22399317, 22721951, 22988851, 23029651, 23071750, 24278008, 24646893	21	10136	0.00207182
P24941	5.7	x	cyclin E LMW	24947816	1	39	0.025641
P51946	9.6	DP00307	Cyclin-H	8941715	1	210	0.0047619
Q05158	24.23	DP00438	Cysteine AND glycine-rich protein 2	9722554	1	125	0.008
P13569	1.89	DP00012	(Cystic fibrosis transmembrane conductance regulator OR CTFR)	10792060, 17660831, 18423665, 22683332, 23052212, 23578801, 23826884, 24191035, 25120007	9	8214	0.00109569
P20070	4.65	x	("cytochrome b5")	18398853	1	2494	0.000400962
P08067	11.63	DP00687	Cytochrome b-c1 complex subunit Rieske AND mitochondria*	10971589	1	4	0.25
P00004	54.29	DP00006	("cytochrome c")	4344990	1	38417	2.60301e-05
Q14061	52.38	DP00543	Cytochrome c oxidase copper chaperone	18093982	1	93	0.0107527
P0ACN7	11.73	x	CytR	24127726	1	101	0.00990099
Q12248	24.47	x	Dad1	20727855	1	123	0.00813008
Q9UD71	85.78	x	DARPP-32 AND PP1	18954090, 20826336	2	52	0.0384615
Q9UER7, O35613	40.81, 38.29	DP00707, DP00708	(DAXX OR Death domain-associated protein 6)	17081986, 19106612, 21134643	3	471	0.00636943
P20449, Q09747	13.9, 16.7	x	Dbp5p	19281819, 21884706	2	17	0.117647
Q96C86	10.09	x	DcpS	15769464	1	200	0.005
Q08949	22.55	x	ddc1	19464966	1	66	0.0151515
O75398	24.96	x	(DEAF1 OR DEAF-1)	23417771, 25310299	2	76	0.0263158
Q24298	5.37	DP00269	DE-cadherin	7958432, 11121423	2	132	0.0151515
P21793	6.11	DP00489	Decorin	15501918	1	2244	0.000445633
P56552	25.93	DP00582	Defensin-like protein	10775411	1	188	0.00531915
P28311	44.57	DP00388	Defensin-related cryptdin-4	15595831	1	3	0.333333
E2GK57	95.51	x	Dehydrin AND (TsDHN-1 OR TsDHN-2)	20921991, 20924623, 21970344	3	5	0.6
P42758	100.0	DP00658	Dehydrin AND (Xero2 OR Lti30)	16565295, 21665998	2	10	0.2
Q6L8H6	97.48	x	Dehydrin CIDhn	18452657	1	2	0.5
P31168	83.77	DP00657	Dehydrin COR47	16565295, 18849483	2	9	0.222222
A1IVM4	100.0	x	Dehydrin dhn13	15711789	1	1	1
P12950	83.93	DP00530	Dehydrin DHN1	12529538, 12644649, 19439573, 22882870	4	14	0.285714
P42763	100.0	DP00667	Dehydrin ERD14	18359842, 21336827	2	7	0.285714
P42759	93.85	DP00606	Dehydrin ERD10	16565295, 18359842	2	7	0.285714
Q4VT48	100.0	x	Dehydrin K2	19842064, 21031484	2	3	0.666667
Q39805	59.73	DP00170	Dehydrin-like protein	12644649	1	37	0.027027
F5CAF0	100.0	x	Dehydrin MpDhn12	21737399	1	1	1
P30185	74.73	DP00689	Dehydrin Rab18	16565295	1	5	0.2
Q3ZNL4	100.0	x	Dehydrin YSK2	19842064	1	4	0.25
Q9LQT8	6.94	DP00724	DELLA protein GAI	19037309, 20103592	2	79	0.0253165
Q08495	55.56	x	Dematin	19241372, 23355471	2	54	0.037037
Q9NZW4	62.64	x	(“Dentin phosphoprotein”)	20037676, 20157636	2	622	0.00321543
P16006	5.7	DP00583	deoxycytidylate deaminase	15504034	1	191	0.0052356
P06968	7.95	DP00337	Deoxyuridine 5'-triphosphate nucleotidohydrolase	1311056, 11257499	2	30	0.0666667
O16042	83.7	x	DF31	18484763	1	7	0.142857
P49869	25.91	DP00594, DP00594_A002	(dHR38 OR hormone receptor 38) AND drosophila	21064127	1	43	0.0232558
P0ABQ4	12.58	DP00301	Dihydrofolate reductase	9012674, 14717591	2	6752	0.000296209
O66990	3.55	x	(dihydroorotase OR DHO)	19128030	1	693	0.001443
Q13062	9.84	x	dihydropyridine receptor AND (alpha1 OR II-III)	18761102, 19076161, 21525002	3	477	0.00628931
Q59471	26.79	DP00105	Diol dehydrase beta subunit	10467140	1	10	0.1
Q59472	30.06	DP00106	Diol dehydrase gamma subunit	10467140	1	7	0.142857
H2I233	11.5	DP00374	Diphtheria toxin repressor	10339551	1	106	0.00943396
Q9NRI5	29.16	x	DISC1	21853134	1	559	0.00178891
P37471	36.0	x	DivlC	11994149	1	2	0.5
P0A6R3	16.33	DP00422	DNA-binding protein fis	1619650, 1946369, 9362499, 11183780	4	409	0.00977995
P08775	16.85	DP00181	DNA-directed RNA polymerase II subunit RPB1	10704311	1	165	0.00606061
P52434	14.0	DP00504	DNA-directed RNA polymerase subunit RPABC3	16632472	1	4963	0.000201491
O00273	18.13	DP00173	DNA fragmentation factor subunit alpha	11371636	1	93	0.0107527
P03018	8.19	DP00684	DNA helicase II	17190599, 19762288	2	12888	0.000155183
P0ABS1	34.44	DP00414	DnaK suppressor protein	15294156	1	44	0.0227273
Q837V6	8.73	DP00326	DNA ligase AND (Enterococcus faecalis OR Streptococcus faecalis)	15296738	1	77	0.012987
P27695	36.79	DP00007	DNA lyase AND (apurinic OR apyrimidinic)	9351835, 11286553	2	1842	0.00108578
P23025	30.77	DP00243	DNA-repair protein complementing XP-A cells	9699634, 10050037	2	9	0.222222
Q13426	27.38	DP00152	DNA repair protein XRCC4	11080143, 11702069, 23197791	3	425	0.00705882
P11387	48.63	DP00075	DNA topoisomerase 1 AND human	8567649, 8631793, 8631794, 9488644, 9488652, 9611241, 10380229, 10497031, 11283003, 14654701, 14741206, 21046176	12	3961	0.00302954
P06786	19.4	DP00076	DNA topoisomerase 2 AND yeast	8538787, 10380229, 12022860	3	292	0.010274
Q9VPU8	45.8	DP00540	Dribble nucleolar protein	16542639	1	1	1
x	x	x	DRM1	23516402, 24442277	2	23	0.0869565
P60896	84.29	DP00617	Dss1	19919104, 23094644	2	84	0.0238095
P47980	33.94	x	dTIS11	25246635	1	6	0.166667
C9WHS9	5.18	x	duffy binding protein II	24384095	1	96	0.0104167
Q13561	25.69	x	dynamitin	24829381	1	131	0.00763359
O14576, Q24246	25.43, 19.0	DP00360, DP00605	(dynein intermediate chain AND (N-terminal OR N-terminus))	15581372, 16949604, 19759397, 20472935, 20974845, 22988856	6	37	0.162162
P03129	36.73	DP00024	(E7 AND HPV)	8245034, 15035602, 16889404, 17715947, 19553340, 19598264, 20088881, 21787785, 22590549, 22683353, 23118886, 23504368, 23864166, 24086265, 24559112	15	3366	0.00445633
P06463	12.66	x	(E6 AND HPV)	16889404, 19553340	2	3507	0.000570288
Q07108	13.07	DP00306	Early activation antigen CD69	11101293	1	1717	0.000582411
P03265	34.97	DP00003	Early E2A DNA-binding protein	4040872, 8039495, 9545375	3	193	0.015544
P03243	14.31	x	E1B-55K	21851959	1	118	0.00847458
P12978	54.41	x	EBNA2	24675874	1	497	0.00201207
P03211	50.55	x	EBNA1	25011696	1	724	0.00138122
A3KLJ6	59.29	x	4E-BP	21183464, 22977176	2	219	0.00913242
Q53630	53.7	x	Ebps	24787448	1	581	0.00172117
F2YRV4	100.0	x	E1B-93R	21851959	1	2	0.5
P12830	14.29	x	E-cadherin	16293619	1	21477	4.65614e-05
P34021	14.58	x	(Ecdysteroid receptor OR EcR OR Ecdysone receptor) AND Drosophila melanogaster	15192079, 19156821, 22628309, 23727127	4	279	0.0143369
Q92838, Q92838-3	35.04, 35.22	DP00460, DP00460_A003	Ectodysplasin-A	14656435	1	583	0.00171527
Q92611	4.57	x	EDEM1	22905195	1	83	0.0120482
x	x	x	E2 enzymes 3R	22507829	1	13	0.0769231
Q01094	30.21	x	E2F1	16734427	1	2720	0.000367647
Q7Z2Z2	20.0	x	EFL1	24406167	1	9	0.111111
P01051	11.43	x	eglin	1505678	1	543	0.00184162
C4LXF1	6.11	x	(EhPCTP-L OR Phosphatidylcholine transfer protein) AND E. histolytica	25223890	1	1	1
P17382	9.54	x	E1 HPV	22278251	1	555	0.0018018
P32501	16.99	x	(eIF-2B OR eIF2beta)	22683627	1	509	0.00196464
O15991	6.47	x	Eisenia lombricine kinase	15327979	1	6	0.166667
Q8KMU4	36.36	x	EJ97	20385607	1	7	0.142857
P13551	18.23	DP00021	Elongation factor G	8070397, 11054294	2	691	0.00289436
P17639	100.0	DP00022	EMB-1 protein	2339072	1	5	0.2
Q8I1K3	21.85	x	EMGAM56	21819990	1	1	1
O00423	10.31	x	EMI1	23708605	1	90	0.0111111
Q9Y6C2	19.49	DP00569	EMILIN1 protein	18463100	1	26	0.0384615
P50465	5.7	DP00375	Endonuclease VIII	16145054	1	730	0.00136986
O43768	93.39	x	(ENSA OR endosulfine alpha OR endosulfine-alpha)	18973346	1	186	0.00537634
Q47785	10.68	DP00289	EntI protein	12832790, 15753083	2	8	0.25
P51671	25.77	DP00641	Eotaxin	9712872, 11425309	2	2776	0.000720461
P00533	4.79	DP00309	(Epidermal Growth Factor Receptor OR EGFR) AND (juxtamembrane domain OR kinase domain)	12196540, 15840573, 22579287	3	4100	0.000731707
O88339	45.39	DP00251	Epsin-1	11756460	1	237	0.00421941
x	x	x	equine lysozyme AND ELOA	20977665	1	6	0.166667
P41161	33.33	x	ERM AND PEA3	20647002	1	72	0.0138889
x	x	x	Er_P1	23665109	1	1	1
Q7DB66	10.0	DP00290	EscJ	15752191	1	17	0.0588235
P86155	32.61	x	esculentin	22899362	1	67	0.0149254
Q8X482	60.42	x	EspF(U)	22921828	1	89	0.011236
P14061	11.89	DP00023	Estradiol 17-beta-dehydrogenase 1	7663947, 8756321, 8805577, 9525918, 9927655, 10625652, 12223444, 12490543	8	916	0.00873362
P03372	11.43	DP00074	Estrogen receptor AND alpha AND (AF1 domain OR N-terminal OR DBD)	9439992, 11595744, 16604168, 22064478, 23792173	5	254	0.019685
Q92731	15.47	DP00079	Estrogen receptor AND beta AND (N-terminal OR N-terminus)	11595744, 16984883	2	111	0.018018
P14921	15.42	x	(Ets-1 OR Ets1) AND (SRR OR “serine rich region”)	18692067, 25017730, 25024220	3	10	0.3
P39935	45.27	DP00082	Eukaryotic initiation factor 4F subunit p150	10409688	1	2	0.5
O74718	28.7	DP00396	Eukaryotic peptide chain release factor GTP-binding subunit	15099522	1	7	0.142857
P62495	5.72	DP00310	Eukaryotic peptide chain release factor subunit 1	10676813	1	26	0.0384615
Q13541	61.86	DP00028	Eukaryotic translation initiation factor 4E-binding protein 1	9684899, 24122746	2	365	0.00547945
Q04637	33.83	DP00406	Eukaryotic translation initiation factor 4 gamma 1	16698542	1	303	0.00330033
Q01844	41.92	DP00632	Ewings Sarcoma AND oncogene AND (EWS OR EWS-Fli1)	17202261, 19584866, 20598937, 22383402, 22399321, 24086122	6	484	0.0123967
Q9ES89	1.82	DP00397	Exostosin-like 2	12562774	1	4	0.25
Q9I322	49.38	x	ExsE	22138394	1	21	0.047619
x	x	DP00270	Fab DNA-1	7506692, 15784256	2	10	0.2
Q8IRG6	28.16	DP00721	FACT AND spt16	18698566, 19605348, 23708362	3	70	0.0428571
Q05344	46.89	DP00720	FACT AND Ssrp1	18698566, 19605348, 23708362	3	75	0.04
P02693	13.64	DP00263	Fatty acid-binding protein AND intestinal	9063893	1	1108	0.000902527
Q9ZPI5	4.41	DP00654	Fatty acid multifunctional protein	20463021	1	605	0.00165289
P12318	11.04	x	Fc receptor gamma chain	21487502	1	1286	0.000777605
P24071	4.88	DP00311	Fc receptor immunoglobulin alpha	12783876	1	4960	0.000201613
P42512	9.31	DP00176	Fe(3+)-pyochelin receptor	16139844	1	6	0.166667
P59113	15.07	DP00655	Fermitin AND mouse	19804783	1	5	0.2
P48632	4.29	DP00183	Ferripyoverdine receptor	15733922	1	23	0.0434783
P00250	14.43	x	2Fe-2S ferredoxin	21760931	1	223	0.0044843
Q99689	40.31	x	(FEZ1 OR fasciculation AND elongation protein Zeta 1)	18615714	1	32	0.03125
P14448	20.78	DP00233	fibrinogen AND (alpha chain OR αIIbβ3)	11601975, 16288455, 20828133, 21044602, 21247890	5	1408	0.00355114
P02679	10.6	x	fibrinogen AND (gammaC peptide OR gamma subunit)	18710925	1	153	0.00653595
Q02020	10.8	DP00234	Fibrinogen beta chain	11601975	1	967	0.00103413
O93568	4.37	DP00235	Fibrinogen gamma chain	11601975	1	311	0.00321543
P14738, Q06556	39.29, 34.19	DP00025, DP00127	(“fibronectin binding protein A” OR FnBPA)	9398523, 18713862	2	406	0.00492611
P17838	12.1	DP00206	Fimbrial protein	11294863	1	1793	0.000557724
P45976	40.06	DP00625	Fip1	18537269	1	99	0.010101
P06179	11.11	DP00026	Flagellin	2810365	1	3902	0.000256279
P00175	9.98	x	flavocytochrome beta 2	8706682	1	46	0.0217391
P36888	4.83	DP00312	FL cytokine receptor	14759363	1	973	0.00102775
P16437	18.84	x	FlgB AND salmonella	15136044	1	24	0.0416667
P0A1I7	11.19	x	FlgC AND salmonella	15136044	1	10	0.1
P16323	29.08	x	FlgF AND salmonella	15136044	1	13	0.0769231
P0A1J3	19.23	x	FlgG AND salmonella	15136044	1	20	0.05
O66683	73.86	DP00701	FlgM	9454599, 12271132, 20298817, 23352839	4	141	0.0283688
P26462	21.15	x	FliE AND salmonella	15136044	1	20	0.05
Q9Y613	21.48	DP00448	formin homology protein OR FHOD1	16361249	1	278	0.00359712
Q6QLQ5	10.81	x	fowlicidin-1 AND cathelicidins	16817888	1	7	0.142857
O43524	39.08	x	FOXO3a	19821614	1	1132	0.000883392
Q06787	29.43	DP00134	Fragile X mental retardation 1 protein	10496225	1	2158	0.000463392
Q16595	18.1	DP00607	Frataxin AND mitochondria*	19843162	1	508	0.0019685
P19970	40.44	x	FRQ	24316221	1	260	0.00384615
Q9RLG7	45.45	x	Fst AND par toxin	20677831	1	10	0.1
x	x	x	Fth AND SRP	9659905	1	1	1
Q07867	23.93	x	FtsL	11994149	1	82	0.0121951
P10121	31.99	x	FtsY	21543314	1	205	0.00487805
P0A9A6	12.27	x	FtsZ	23692518, 23714328, 25305578	3	1602	0.00187266
Q9UQC2	42.16	x	Gab2	24739176	1	315	0.0031746
Q13480	40.63	x	Gab1	21935523, 22536782	2	413	0.00484262
Q08605-2	40.66	DP00328	GAGA transcription factor	9878427	1	211	0.00473934
P0CL82	86.32	x	GAGE-12I	23029259	1	1	1
P04386	11.58	x	Gal4	15826952	1	4292	0.000232992
Q9Z0U4	4.94	DP00463	Gamma-aminobutyric acid type B receptor subunit 1	15304491	1	178	0.00561798
O76070	53.54	DP00630	(“gamma synuclein”)	10942772, 11812782, 12667059, 17234772, 17567567, 19081538, 22620680, 23526115, 23532302, 24489820	10	354	0.0282486
P08050	19.9	DP00278	Gap junction alpha-1 protein	12151412, 14699011, 15284189, 15492000	4	130	0.0307692
Q01231	23.18	DP00646	Gap junction alpha-5 protein	19808665	1	9	0.111111
Q28181-4	73.39	DP00441	GARP	16280326	1	255	0.00392157
P03069	51.6	DP00083	General control protein GCN4	2145515, 2204805, 16483603	3	104	0.0288462
Q9MAA7	3.77	DP00723	Gibberellin receptor GID1A	19037309	1	31	0.0322581
P58466	13.03	x	(GIP OR SCP1)	24751520, 24925644	2	2919	0.000685166
Q03768	36.98	DP00163	Gir2	14715270, 15896712	2	11	0.181818
P10071	33.23	x	Gli3	24146948	1	681	0.00146843
Q07731	29.86	DP00029	Glial cell line-derived neurotrophic factor	9187648, 10545102	2	3683	0.000543036
Q7KT70	8.68	x	(gliotactin OR Gli-cyt) AND Drosophila	14579366	1	12	0.0833333
P15456	7.91	x	globulin cruciferin B	15912356	1	8	0.125
P35557	5.59	x	glucokinase	23271955	1	3364	0.000297265
P00502	12.61	DP00731	Glutathione S-transferase alpha-1	11119643	1	176	0.00568182
P10388	50.83	DP00285	Glutenin subunit DX5	12741823	1	9	0.111111
P50440	7.33	DP00099	Glycine amidinotransferase mitochondria*	9165070, 9218780	2	23	0.0869565
P13255	2.39	DP00031	Glycine N-methyltransferase	10756111	1	376	0.00265957
P49841	19.29	DP00385	Glycogen synthase kinase-3 beta	11427888, 11440715, 12554650	3	4189	0.000716161
F8WQN2	6.77	x	glycolate oxidase	8706682	1	314	0.00318471
P56206	6.72	DP00032	Glycyl-tRNA synthetase	7556056, 10064708	2	172	0.0116279
Q01417	80.35	DP00664	GmPM1	20071374	1	2	0.5
Q6QCC2	17.15	DP00471	GNA1870	16407174	1	9	0.111111
P03661	29.01	DP00034	G3P attachment protein	10329170, 10756036	2	10	0.2
P03712	30.91	x	gpNU3	21821043	1	5	0.2
P13404	43.78	x	GRA2 AND “Toxoplasma Gondii”	24327774, 25246715	2	50	0.04
x	x	x	GRAS Proteins	21732203, 22280012	2	599	0.0033389
O88900	14.68	DP00490	Grb14 AND PIR domain	14623073, 15465854	2	9	0.222222
Q08969	89.88	x	GRE1	21420397	1	14	0.0714286
P0A6F5	9.49	x	GroEL	8876186, 15238634, 16223749, 24970895	4	2724	0.00146843
P0A6G1	14.43	DP00412	GroES	21507961, 23583779	2	1176	0.00170068
P24522	20.0	DP00704	Growth arrest AND DNA damage-inducible protein GADD45 alpha	20460379	1	23	0.0434783
Q14449	13.15	DP00230	Growth factor receptor-bound protein 14	15901248	1	48	0.0208333
P62993	9.68	DP00210	Growth factor receptor-bound protein 2	11178911	1	2094	0.000477555
P10912	10.34	DP00033, DP00033_C001	Growth hormone-binding protein	1549776, 8943276, 9571026	3	768	0.00390625
P16442	4.8	DP00339	GTA AND blood	12198488, 15987364	2	78	0.025641
B0B1U2	9.6	DP00338	GTB AND blood	12198488, 15987364	2	175	0.0114286
Q13569	27.56	DP00719	G/T mismatch-specific thymine DNA glycosylase	15959518, 16626738, 18512959, 18587051, 21620710	5	531	0.0094162
P01112	3.7	DP00153	GTPase HRas	2406906, 8142349, 9230043, 12842038	4	2018	0.00198216
Q15382	7.07	DP00364	GTP-binding protein Rheb	15728574	1	289	0.00346021
P04695	16.86	DP00273	Guanine nucleotide-binding protein Gt	9539726	1	242	0.00413223
Q8NDV7	41.28	x	GW182 protein	24043833	1	141	0.0070922
Q6Q547	81.03	DP00475	H/ACA ribonucleoprotein complex subunit 3	16373493	1	5	0.2
P0C686	20.78	x	(HBx OR hepatitis B protein x)	22820921	1	2716	0.000368189
O60741	16.63	x	HCN1	25142030	1	392	0.00255102
P22121	32.2	DP00036	Heat shock factor protein AND (Kluyveromyces lactis)	7849597, 8745404	2	15	0.133333
P10961	33.73	DP00135	Heat shock factor protein AND (Saccharomyces cerevisiae OR yeast)	8745404	1	930	0.00107527
P14602	21.05	DP00142	Heat shock protein beta-1	7649277	1	2899	0.000344947
D4GYC2	25.29	x	Hef	24947516	1	296	0.00337838
Q03281	41.93	x	Heh2	23357007	1	23	0.0434783
P13102	0.18	DP00566	Hemagglutinin	8072525, 21763731	2	18266	0.000109493
P80960	9.09	x	hemocyanin	16332393	1	4981	0.000200763
O89339	18.42	DP00698	(henipavirus OR hendra virus) AND (nucleoprotein)	20657787, 21317293, 22108848, 22881220	4	21	0.190476
O55778	30.83	DP00700	(henipavirus OR hendra virus) AND (phosphoprotein)	20657787, 21317293, 24086133	3	34	0.0882353
P03159	4.85	x	Hepatitis B polymerase	23202419	1	6736	0.000148456
P27958	3.29	DP00588_C002	(“hepatitis C virus” AND “core protein” )	18992225, 20453932, 24030713	3	3236	0.00092707
Q69422	3.63	DP00674, DP00674_C001	Hepatitis GB virus B core protein	18033802	1	11	0.0909091
P08581	1.22	DP00317	Hepatocyte growth factor receptor	14559966, 15167892	2	6193	0.000322945
P06492	22.45	DP00087	herpes virus AND VP16	10398682, 15654739, 15826952, 19643037	4	723	0.0055325
P09651	44.62	DP00324	Heterogeneous nuclear ribonucleoprotein A1	11917013	1	545	0.00183486
A0A075C3Q2	8.19	x	(HEV OR hepatitis E) AND polyproline region	22811526	1	4	0.25
P0A6X3	27.45	x	Hfq AND (Escherichia coli OR E. Coli) AND (C-terminal or C-terminus)	21330354, 23396917	2	23	0.0869565
Q16665	25.91	DP00262	HIF-1 alpha AND (CAD OR N-TAD OR ODD)	11959977, 15629713	2	105	0.0190476
P30273	17.44	DP00509	High affinity immunoglobulin epsilon receptor subunit gamma	14967045	1	2	0.5
P63158	80.47	DP00384	High mobility group protein B1	15379539	1	2941	0.00034002
P17096	100.0	DP00040	High mobility group protein HMG-I/HMG-Y	7559428, 10372360, 11498590, 11593421, 19732855, 21545188	6	69	0.0869565
P07746	80.39	DP00041	High mobility group-T protein	6273163	1	6	0.166667
P01050	32.31	DP00137	Hirudin variant-1	2567183, 3013692	2	32	0.0625
P06180	58.98	DP00213	Histone-binding protein N1/N2	12695505	1	12	0.0833333
P10922	100.0	DP00097	Histone H1.0	10794405, 11413144, 11584004, 16006555	4	213	0.0187793
P68432	36.76	x	Histone H3	19878690, 21517079, 22212475	3	36292	8.26628e-05
P53551	92.64	DP00423	Histone H1	2373370, 9109385, 14654695, 15050829, 15878177, 21464206, 22021384, 22813934, 24622397, 24906881	10	34935	0.000286246
P02259	100.0	DP00044	Histone H5	2181148	1	33570	2.97885e-05
P15865	100.0	DP00136	histone H1.2	2373370, 9109385	2	86	0.0232558
P04908	37.69	x	Histone H2A	21517079, 22212475	2	33886	5.90214e-05
P62805	38.83	x	Histone H4 AND N-terminal domain	19395382, 21517079, 22988066	3	463	0.00647948
P62807	62.7	x	Histone H2B	21517079	1	33905	2.94942e-05
P12493, P27958	32.4, 3.29	DP00101, DP00101_C006	HIV AND P6 AND gag	16234236	1	312	0.00320513
P69723	18.75	x	HIV-1 AND Vif AND (C-terminal OR C-terminus)	17598142, 19218568, 20450485	3	74	0.0405405
P12497	13.52	DP00410_C011, DP00410	(HIV-1 Integrase OR HIV-1 gag OR HIV-1 p24)	2438988, 9735293, 21134384, 24960591	4	10585	0.000377893
P04325	50.86	DP00424	HIV-1 Rev	2125482, 7510518, 23972852	3	3075	0.00097561
Q1PAB4	64.36	DP00650	HIV-1 Tat	16423825, 18189286, 19941902, 20034112, 20450479, 21035463, 21189124, 21303342, 21560167, 23471103, 23557146	11	4193	0.00262342
P06939	28.57	x	HIV-2 Vpx	24956595	1	145	0.00689655
P09429	80.47	x	HMGB1	25190813	1	3734	0.000267809
P82970	100.0	x	HMGN5	21518955	1	16	0.0625
Q14978	86.98	x	(hNopp 140 OR Nopp 140 OR human nucleolar phosphoprotein p140)	22906532, 24218616	2	9	0.222222
Q00839	34.18	x	hnRNP-u	22902625	1	106	0.00943396
P23441	32.53	DP00071	Homeobox protein Nkx-2.1	8282100, 8898894, 9425125	3	12	0.25
Q99801	77.35	DP00683	Homeobox protein Nkx-3.1	19780584	1	10	0.1
Q58667	7.65	DP00619	Homoaconitase small subunit	20170198	1	5	0.2
P20050	12.73	x	Hop1	23841450	1	128	0.0078125
Q86TP1	14.35	x	(h-prune OR human prune protein)	23939913	1	101	0.00990099
O95197	30.52	x	hRTN3	19364499	1	2	0.5
P38753	32.74	DP00635	HSE1	16110343, 17543868	2	31	0.0645161
Q00613	32.89	x	HSF1 AND (C-terminal OR C-terminus)	17323918, 22044151	2	46	0.0434783
P0A6H5	19.41	DP00100	hsl protease AND ATP	10693812	1	5	0.2
P22943	77.06	DP00705	Hsp12	20797624, 21420397, 21998307, 22848679	4	103	0.038835
Q9UJY1	32.65	x	Hsp22	17722063, 19783089	2	147	0.0136054
P12810	23.84	DP00677	HSP16.9	11702068	1	22	0.0454545
Q08914	3.38	x	Hsp33	22385960	1	52	0.0192308
P04792	37.07	x	Hsp27	22057845	1	3274	0.000305437
P02829	25.39	x	hsp90 atpase	22660624	1	815	0.00122699
P16860	32.09	DP00551	(“human cardiac hormone”) AND (N-terminal OR N-terminus) AND “B-type natriuretic peptide”	17399679, 18440296	2	2142	0.000933707
Q02413	8.1	x	human desmoglein 1	19136012	1	672	0.0014881
P49354	21.9	DP00558	human farnesyltransferase	11687658	1	1391	0.000718907
P04150	17.63	DP00030	human glucocorticoid receptor AND (AF1 OR transcription-activating fragment OR activation function subdomain OR activation domain)	10196139, 15545613, 18946767, 19841061, 20184958, 21501657, 21603604, 21760925, 22003412, 22669939, 22988850, 23132854	12	457	0.0262582
Q8IVG9	66.67	x	Humanin	20116397	1	173	0.00578035
Q6WB98	1.67	x	human metapneumovirus glycoprotein ectodomain	25031352	1	3	0.333333
P15927	20.0	x	human replication protein A	16060685, 17976647	2	981	0.00203874
P12579	57.68	DP00447	(“human respiratory syncytial virus”) AND (phosphoprotein OR protein) AND (N-terminal OR N-terminus OR C-terminal OR C-terminus)	16361428, 24031640	2	144	0.0138889
Q9NX55	72.09	DP00546	(Huntingtin-interacting protein 1 OR HIP1)	18155047	1	247	0.00404858
Q9NX55	72.09	x	(huntingtin yeast two hybrid protein OR hypk)	18076027, 23272104, 24465598, 25116620	4	60	0.0666667
P07242	50.74	x	H5 vaccinia virus	23476017	1	32	0.03125
F6IAY2	19.08	x	(HvNAC013 OR NAC013)	21856750	1	2	0.5
K9S1M5	33.33	x	HvNAC005 OR NAC005	21856750	1	2	0.5
O24646	76.19	DP00469	HY5	17001643	1	262	0.00381679
P38216, P47009, P53872	50.78, 74.04, 84.8	x	hydrophilin	21420397	1	6	0.166667
Q27796	8.6	DP00045	Hypoxanthine-guanine phosphoribosyltransferase	9790669	1	4495	0.000222469
P22362	17.71	DP00644	I-309	10821677	1	138	0.00724638
P01094	85.29	DP00586	(“IA3” OR “IA 3” OR “IA(3)” OR "IA₃") AND (Saccharomyces cerevisiae OR Yeast)	15065849, 17087512, 18681437, 19003993, 21080428, 21490720	6	248	0.0241935
O14576	25.43	x	IC AND cytoplasmic dynein	25263009	1	39	0.025641
Q9NSA3	51.85	x	ICAT AND transcriptional inhibitor	16293619	1	17	0.0588235
P35521	45.96	DP00717	(Icln OR pICln)	15905169, 22179008	2	106	0.0188679
P41134	20.0	x	Id protein HLH domain	24981796	1	264	0.00378788
P03169	34.01	x	IE1	19812155	1	822	0.00121655
P09310	28.4	x	(IE62 OR varicella-zoster virus major transactivator)	19357160	1	145	0.00689655
P01096	71.56	x	IF1 AND Bovine	25049402	1	49	0.0204082
P73124	46.15	DP00158	(IF7 OR IF17) AND “glutamine synthetase”	12824490, 21992216, 22023175	3	8	0.375
x	x	x	IgE cepsilonmx	24457896	1	4	0.25
x	x	DP00710	IgG heavy chain CH1	11036070, 19524537	2	62	0.0322581
G2WJG6	9.64	x	(importin-beta OR Kap95p)	20816072, 25435324	2	1310	0.00152672
P50097	0.6	DP00399	Inosine-5'-monophosphate dehydrogenase	9271497	1	303	0.00330033
P24592	25.42	DP00211	Insulin-like growth factor-binding protein 6	15308688	1	262	0.00381679
P03355	22.5	DP00651, DP00651_C007	Integrase p46	20026028	1	2	0.5
P32455	19.43	DP00313	Interferon-induced guanylate-binding protein 1	10676968	1	21	0.047619
P10914	44.62	x	interferon regulatory factor 1	20947504, 21245151, 23134341	3	1689	0.0017762
P07476	65.81	DP00221	Involucrin	10601302	1	1510	0.000662252
Q13568	30.52	x	IRF5	22995936	1	364	0.00274725
Q9UQB8	33.7	x	IRSp53	18417251	1	114	0.00877193
P10997	7.87	x	(“islet amyloid polypeptide” OR IAPP)	10191146, 15576552, 16197548, 17123962, 19647750, 20201512, 20337445, 21215287, 23266002, 23380070, 24009497, 24021023, 25260075	13	2321	0.00560103
P78504	5.17	DP00418	Jagged-1 AND human AND cytoplasmic tail	16427310, 17892488	2	4	0.5
P29375	22.13	DP00713	JARID1A	18270511, 19430464	2	32	0.0625
Q9UGL1	17.29	DP00712	JARID1B	19636953, 20403335	2	60	0.0333333
Q8TAM6	66.2	x	Juxtanodin	23198089	1	6	0.166667
P02668	49.47	DP00192	kappa casein	11784308, 18155889, 18700180, 20025277, 21689790, 21961598, 22443319, 25035108	8	10004	0.00079968
Q5JVS0	49.88	x	Ki-1/57	18788774, 20436279	2	17	0.117647
P07674	39.11	DP00656	KorB	20200158	1	644	0.0015528
P03023	8.61	DP00433	Lactose operon repressor	8638105, 8683581, 9032054	3	949	0.00316122
P02788	2.96	DP00616	(Lactotransferrin OR lactoferrin)	19858187, 25245670	2	6859	0.000291588
P02545	34.79	DP00716, DP00716_C001	Lamin A/C	12057196, 21635954	2	1243	0.00160901
A3MYU7	21.37	x	L20 AND ribosomal protein AND (extension OR "amino terminal" OR N-terminal OR N-terminus)	16977336, 19399222	2	10	0.2
Q6PBE3	27.03	DP00579	L5 AND xenopus AND ribosome	12860121	1	14	0.0714286
A8CDV5	94.07	DP00538	Latent membrane protein 2A	17174309	1	217	0.00460829
Q9CX60	51.43	DP00661	(LBH OR limb bud and heart) AND (transcription or transcriptional)	20005203	1	82	0.0121951
Q2PEE1	15.73	x	LC8	21533121, 21777386	2	133	0.0150376
P32004	5.33	DP00666	(L1-CAM OR Neural cell adhesion molecule L1)	18321067	1	1557	0.000642261
I1JLC8	100.0	DP00185	LEA protein 1 AND soybean	11891239	1	16	0.0625
Q9UJU2	51.13	x	Lef-1	16293619, 22089506	2	1110	0.0018018
P16535	7.76	DP00345	Leukotoxin	7703231	1	768	0.00130208
E7Q1N2	43.27	x	Lhp1p	21212361	1	20	0.05
P60752	2.92	DP00400	(Lipid A export ATP-binding OR permease protein msbA)	11546864	1	141	0.0070922
Q9HKT1	9.92	DP00096	Lipoate-protein ligase A subunit 1	16384580	1	4	0.25
P31025	11.93	DP00647	Lipocalin-1	15489503, 19770509	2	209	0.00956938
Q6EAJ7	62.42	x	Listeria monocytogenes ActA	18577520	1	494	0.00202429
x	x	x	LjIDP1	18779323	1	1	1
Q9SEW0	87.32	x	LLA23	23317817	1	5	0.2
Q8T6T7	6.56	x	Lombricine Kinase	21212263	1	19	0.0526316
P32170	9.79	DP00429	L-rhamnose isomerase	10891278	1	38	0.0263158
P05455	41.91	DP00229	Lupus La protein	12842046, 15004549, 16387655	3	2365	0.0012685
P0C5S4	16.67	DP00292	luxU Phosphorelay protein	15740742	1	9	0.111111
Q9QXN1	55.42	DP00046	Lymphoid enhancer-binding factor 1	7651541	1	906	0.00110375
P00703	0.68	DP00259	Lysozyme C	1515108, 15805597	2	4276	0.000467727
P16636	22.14	x	Lysyl oxidase	20192271	1	1537	0.000650618
O33599	26.58	DP00352	lytM	16269153	1	46	0.0217391
B6TRJ5	29.11	x	MA16	22270696	1	17	0.0588235
P39900	4.04	DP00571	Macrophage metalloelastase	15809432	1	617	0.00162075
P21758	28.92	DP00246	Macrophage scavenger receptor types I and II	11785981	1	96	0.0104167
P04156, P04925, P04273	32.81, 31.5, 36.22	DP00466, DP00265, DP00187, DP00483	major prion protein	9132005, 10618385, 11685242, 12890024, 17190613, 17210575, 17256089, 17299036, 17359979, 19913031, 20356930, 20580965, 20627399, 20958083, 21091436, 21196244, 21441896, 21726811, 22339436, 22421432, 22529103, 22676969, 22987112, 23145167, 24106878, 25034251, 25101991	27	1025	0.0263415
P55145	13.19	x	(MANF OR mesencephalic astrocyte-derived neutrotrophic factor)	19258449	1	65	0.0153846
P46821	47.89	x	MAP1B	23339032	1	515	0.00194175
P15146	54.0	DP00122	(MAP2c OR “microtubule-associated protein 2”)	15751971, 21634433, 23877929	3	33929	8.84199e-05
P27816	63.8	x	(MAP4 OR microtubule associated protein 4)	25054624	1	291	0.00343643
P26645	100.0	DP00253	MARCKS	8608129, 11829734, 15640140, 18502797, 22427633, 24590112	6	742	0.00808625
P61244, P61244-2	94.38, 95.36	DP00084, DP00084_A002	Max AND c-myc	16171389, 19022175, 19114306, 22815918, 23106332	5	868	0.00576037
P0AE73	21.95	DP00296	(MaZE OR PemI-like protein 1) AND (Escherichia coli OR E. coli) AND (C-terminal OR C-terminus)	12533537, 12718874, 12743116, 15735309	4	8	0.5
P0AE70	9.91	DP00299	MaZF AND (Escherichia coli OR E. coli)	12718874	1	116	0.00862069
Q9UIS9	37.69	x	MBD1	24810720	1	205	0.00487805
Q07820	30.0	x	(MCL-1 OR “myeloid cell leukemia 1”) AND (N-terminal OR N-terminus)	20392693, 20480043	2	368	0.00543478
D0VWX1	27.27	DP00681	MCoCC-1	19711988	1	2	0.5
Q00987	31.16	DP00334	MDM2	11718560, 12630860, 15953616, 18809412, 20303977, 20436290, 21191186, 22807444, 24127580	9	6283	0.00143244
O15151	22.65	x	(MDMX OR MDM4)	24127580	1	497	0.00201207
Q89933, P04851	14.1, 15.11	DP00160, DP00640	(“measles virus”) AND nucleoprotein	12621042, 14645906, 14749181, 17034249, 18536007, 19198564, 19445677, 19718689, 20058326, 20303863, 20450481, 20816082, 20925409, 21533140, 21613569, 21805002, 22399322, 22887965, 22901047, 23811056, 24043820	21	360	0.0583333
P03422	44.77	DP00133	(“measles virus”) AND phosphoprotein	12069524, 12944395, 14645906, 15479804, 16046624, 20058326, 20450481, 21805002, 22887965	9	229	0.0393013
P38111	3.55	x	mec1	19464966	1	515	0.00194175
P51608	74.49	DP00539	(MeCP2 OR Methyl-CpG-binding protein 2)	17371874, 20405910, 21031501, 21278419, 22294343, 24766768	6	1977	0.0030349
G4V6N9	68.38	x	MEG-14	23746503	1	2	0.5
Q91V27	40.34	DP00541	melanophilin	17513864	1	81	0.0123457
Q80FJ1	34.4	DP00276	Membrane fusion protein p14	15448165	1	27	0.037037
Q14696	52.56	x	(mesoderm development candidate 2 OR MESD)	17488095	1	139	0.00719424
Q82S91	83.76	DP00205	Metal-binding protein smbP	15366930	1	1	1
Q9XBN7	7.23	x	Metallo beta lactamase	19395380	1	2055	0.000486618
P02795	19.67	x	metallothionein-2A	24918957	1	75	0.0133333
Q8B9Q8	69.05	x	metapneumovirus phosphoprotein	24224051	1	19	0.0526316
P22868	21.26	DP00379	Methane monooxygenase component C	15379538	1	800	0.00125
P02942	9.62	DP00300	Methyl-accepting chemotaxis protein I	15774032	1	931	0.00107411
P07017	14.47	DP00294	Methyl-accepting chemotaxis protein II	15774032	1	930	0.00107527
Q25460	64.8	x	(mfp-1 OR fp1) AND mussel	22915553	1	10	0.1
Q2Q9Z9	10.14	x	(mfp-3 OR fp3) AND mussel	22915553	1	10	0.1
Q25464	2.75	x	(mfp-2 OR fp2) AND mussel	22915553	1	3	0.333333
P32787	17.1	x	MGM101	23418572	1	13	0.0769231
Q29983	7.57	DP00670	MHC class I polypeptide-related sequence A	10367903	1	30	0.0333333
O27798	11.11	x	(minichromosome maintenance protein OR MCM OR N-mtMCM) AND protein	22208199	1	2175	0.00045977
Q9VFY9	23.49	x	2mit	24098788	1	1	1
Q9Y3D6	9.87	DP00457	(Mitochondria* fission 1 protein OR Fis1)	14623186	1	829	0.00120627
Q03164	38.47	x	(“mixed lineage leukemia”) AND protein	20961854, 20969867	2	825	0.00242424
Q969V6	46.29	x	MKL1	24909411	1	178	0.00561798
P11409	11.01	DP00060	Modification methylase PvuII	9207015	1	49	0.0204082
Q13485	17.03	DP00464	Mothers against decapentaplegic homolog 4	10647180	1	2781	0.000359583
x	x	x	MpAsr	21327389	1	2	0.5
Q03834	19.57	x	Msh6	17531814	1	1146	0.0008726
P33748	37.22	x	Msn2	22505609	1	248	0.00403226
B7SX18	83.2	x	MSP2 AND “Plasmodium Falciparum”	17883245, 18440022, 19450733, 20545323, 20865513, 21784057, 22304430, 22749949, 22966050	9	204	0.0441176
Q13043	31.62	x	MST1 SARAH Domain	22112013	1	14	0.0714286
Q9DBZ9	29.99	x	mSYD1A	23791195	1	1	1
P52477	22.19	DP00401	Multidrug resistance protein mexA	15226509	1	101	0.00990099
P35372	8.5	DP00272	Mu-type opioid receptor	15680247	1	114	0.00877193
P02687, P02686, P04370, P81558	57.4, 50.0, 57.6, 76.61	DP00047, DP00236, DP00237, DP00663	(“myelin basic protein”)	12372316, 12605403, 14695288, 15219899, 16420483, 16794783, 17131428, 17676872, 18284662, 18326633, 18449534, 19134474, 19519451, 19636827, 19642704, 19855925, 19856323, 19903451, 20169373, 20453917, 20593886, 20831157, 21044600, 21887699, 21889463, 22249765, 22405011, 22728818, 22947219, 23618134, 23861868, 24516125, 24758710, 24956930	34	9697	0.00350624
P70475	46.67	DP00049	Myelin transcription factor 1-like protein	10606515	1	6	0.166667
P15172	35.94	x	MyoD	1327135	1	3390	0.000294985
P02185	16.88	DP00303	Myoglobin or apomyoglobin	8844864, 12079388, 21640124	3	11645	0.000257621
P52179	18.87	DP00517	Myomesin-1	15890201	1	11	0.0909091
Q9Y4I1	14.56	x	myosin 5a	25312846	1	49	0.0204082
P90648	15.3	x	(myosin II heavy chain kinase B OR MHCK-B)	20199682	1	69	0.0144928
P24844	37.21	x	Myosin light chain 1	3233216	1	5351	0.000186881
P10587	34.66	DP00102	("myosin motor domain")	9147986, 9741621	2	117	0.017094
Q9TW98	11.45	x	n16.3	24720254	1	1	1
P38996	42.39	x	Nab3	24100036	1	57	0.0175439
Q9C000	11.34	DP00554	NACHT LRR PYD domains-containing protein 1	14527388	1	15	0.0666667
Q969F2	51.66	DP00520	Naked2	17045239	1	8	0.125
O75376	48.85	x	(NCoR OR NCoR-1 OR SMRT)	21925568	1	896	0.00111607
P26477	56.7	DP00027	Negative regulator of flagellin synthesis	9095196	1	47	0.0212766
Q96FI4	37.18	x	NEIL1 AND (C-terminal or C-terminus)	22902625, 23542007	2	14	0.142857
P19246	74.22	DP00050	Neurofilament heavy polypeptide	3220257, 9424114, 9714161	3	139	0.0215827
P02547	36.98	DP00151	Neurofilament light polypeptide	3920075, 8634266	2	317	0.00630915
Q92686	69.23	x	neurogranin	23462742, 24713697	2	290	0.00689655
Q9NZ94	8.84	DP00553	(“neuroligin 3”)	18456828, 19898942, 21481779, 21647611	4	105	0.0380952
P17677	100.0	x	neuromodulin	23462742	1	2519	0.000396983
P30990	14.71	x	neurotensin	15994900	1	5218	0.000191644
P25963	25.55	DP00468	NF-kappa-B inhibitor alpha OR IkappaBalpha	7891711, 9872404, 18565540, 21628581, 24605363	5	7656	0.000653083
P01138	14.94	x	NGF AND neurotrophin	20923662	1	2287	0.000437254
Q92886	40.08	DP00672	(NGN1 OR neurogenin 1)	20102160	1	430	0.00232558
P19634	4.66	x	NHE1 AND (C-terminal OR C-terminus)	20556825, 21425832	2	50	0.04
Q9IH62	1.83	DP00686	(Nipah virus OR NiV) AND glycoprotein	18815311	1	177	0.00564972
Q9IK92	15.79	DP00697	(Nipah virus OR NIV) AND nucleoprotein	20657787	1	18	0.0555556
Q9IK91	35.26	DP00699	(Nipah virus OR NIV) AND phosphoprotein	20657787	1	39	0.025641
Q12972	33.9	x	NIPP1	22866172, 22940584, 22988849	3	39	0.0769231
A0A023YU88	7.85	x	NleH	24373767	1	22	0.0454545
Q13224	7.35	x	(NMDAR2B OR GluN2B)	18197970, 21481779, 21712388, 23782697	4	459	0.0087146
Q7Z406	34.54	x	(NMII OR non muscle myosin II)	19959848	1	2413	0.000414422
Q96E22	13.31	x	Nogo-B AND (N-terminal OR N-terminus OR C-terminal OR C-terminus)	17397058, 17437522, 17585875, 19508346	4	17	0.235294
P11632	94.62	DP00432	Non-histone chromosomal protein 6A	10228169	1	4	0.25
P02315	100.0	DP00042	Non-histone chromosomal protein H6	6273163	1	14	0.0714286
P02316	100.0	DP00038	Non-histone chromosomal protein HMG-14	6273163	1	71	0.0140845
P05204, P02313	100.0, 100.0	DP00039, DP00195	Non-histone chromosomal protein HMG-17	565710	1	75	0.0133333
I7GQ94	22.48	x	(n16 OR n16N)	21473588	1	185	0.00540541
Q61985	29.82	DP00671	Nrf2 AND Neh2 domain	16581765, 18762866	2	27	0.0740741
Q13127	50.23	x	(NRSF OR neural restrictive silencer factor)	21627111, 24446368	2	317	0.00630915
Q9WMX2, P27958	3.32, 3.29	DP00588_C010, DP00615_C010, DP00615	(NS5A OR Non structural protein 5A) AND hepatitis	15247283, 15339921, 15902263, 17880107, 18032500, 19244328, 19249289, 19297321, 20450484, 21489988, 21516467, 22543239, 22720086, 23740998, 23947833, 25031324	16	1342	0.0119225
P26662	2.96	x	(NS5B OR Non structural protein 5B) AND hepatitis	22815741	1	1446	0.000691563
Q80J95	16.6	x	NS1-2 norovirus	22347381	1	8	0.125
P26662	2.96	x	(NS3 OR non structural protein 3) AND hepatitis C virus	23803659	1	2768	0.000361272
x	x	x	(Nsp OR nucleoskeletal-like protein) AND bacillus subtilis	23358668	1	2	0.5
P34130	15.24	x	NT4 AND neurotrophin	20923662	1	146	0.00684932
Q9SQ56	66.56	x	NtGR-RBP1	24957607	1	1	1
Q9BYD2	12.36	x	(NTL9 OR N terminal domain of the ribosomal protein L9)	12416980	1	66	0.0151515
O67198	9.34	x	Ntrc1	16169010	1	13	0.0769231
Q09161	19.11	DP00392	Nuclear cap-binding protein subunit 1	11545740	1	39	0.025641
P52298	20.51	DP00393	Nuclear cap-binding protein subunit 2	11545740	1	37	0.027027
Q8WUM0	8.04	DP00318	Nuclear pore complex protein Nup133	15557116, 17360435	2	39	0.0512821
Q9Y6Q9-3	36.75	DP00343	Nuclear receptor coactivator 3	11823864	1	506	0.00197628
P03347	32.62	DP00148, DP00148_C004	Nucleocapsid protein p7	1304355, 1639074	2	164	0.0121951
P05221	66.5	DP00217	Nucleoplasmin	11248694, 24121686	2	335	0.00597015
Q9RY71	16.37	x	nudix hydrolase	20657662	1	214	0.0046729
P35658	30.96	x	Nup214	24739174	1	182	0.00549451
P40477	29.66	x	Nup159	23223634, 24037535, 25263009	3	43	0.0697674
P57740	11.24	x	Nup107	17360435, 24739174	2	82	0.0243902
P37198	26.44	x	Nup62	24739174	1	70	0.0142857
P49790	40.41	x	Nup153	17446086, 21961597, 22665783, 24739174, 24898547	5	181	0.0276243
Q02630	37.11	x	Nup116 AND (Saccharomyces cerevisiae OR yeast)	18688269	1	37	0.027027
P52948	19.15	x	Nup96 OR Nup98	17360435, 24739174	2	389	0.00514139
P32499	67.22	DP00222	NUP2P nucleoporin AND (Saccharomyces cerevisiae OR yeast)	12065587	1	19	0.0526316
O60356	100.0	x	(Nupr1 OR p8 nucleoprotein) AND human	23929272, 24205110	2	58	0.0344828
O24172	36.0	DP00580	("ole e 6")	15247256	1	9	0.111111
P08523	28.22	DP00279	Olfactory marker protein	16008352	1	845	0.00118343
Q9FUW7	100.0	DP00227	Omega gliadin storage protein	12741823	1	24	0.0416667
P02631	32.11	DP00730	Oncomodulin	8487302, 17766386	2	143	0.013986
Q39532	44.36	DP00470	Opaque 2	15096055	1	2868	0.000348675
P10451	45.86	DP00214	(OPN OR osteopontin)	11162539, 15892946, 19636917, 20152802, 20174473, 21609000, 22342723, 22730383, 24327307, 24928493	10	7702	0.00129836
E7QAI1	42.5	x	Opy2p	19846660	1	2	0.5
P07805	2.84	DP00051	Ornithine decarboxylase	10563800, 10985770	2	7562	0.00026448
Q13438	37.03	x	OS-9	25193139	1	124	0.00806452
P81455	38.78	DP00116	Osteocalcin	8101026, 8218200	2	14028	0.000142572
Q9BRP0	26.91	x	OVOL2	22737237	1	15	0.0666667
O00110	25.23	x	OVOL3	22737237	1	1	1
Q86XL8	14.75	x	OVOL1	22737237	1	26	0.0384615
Q09472	28.38	DP00633	p300 acetyltransferase	17438265, 23133622, 23307074, 24253305	4	930	0.00430108
Q96GU1	72.31	x	(PAGE5 OR Prostate associated gene 5)	19768387, 22073178	2	2001	0.0009995
O60829	100.0	x	(PAGE4 OR “Prostate associated gene 4”)	21357425, 22078626, 24263171, 24559171	4	2014	0.0019861
Q66SS1	35.07	DP00568	Paired box 6	10346815	1	1305	0.000766284
O96013	31.64	x	PAK4	23876315	1	160	0.00625
P32521	37.3	x	Pan1	23801378	1	77	0.012987
Q58A45	12.97	x	pan3	23340509	1	39	0.025641
P00974	5.0	DP00729	Pancreatic trypsin inhibitor	11320305	1	4801	0.00020829
P04637	39.69	DP00086	p53 AND (CTD or C-terminal or C-terminus)	7559631, 8875929, 9169453, 9405613, 12110597, 12351827, 12681938, 14499615, 14534297, 15837201, 16118206, 16461914, 17335006, 17438265, 17620598, 17972286, 18189286, 18366598, 18391200, 18410249, 18809412, 18812399, 18824006, 19162020, 19216110, 19557012, 19819244, 19847292, 19933326, 20516128, 20873738, 20876941, 20961098, 21457718, 21528875, 21541066, 21686180, 21943426, 21979461, 22046250, 221…	61	1240	0.0491935
O60356	100.0	DP00510	p8 AND human AND nucleoprotein	11056169, 11350901	2	21	0.0952381
P15309	6.22	x	PAP AND protein	25267253	1	5439	0.000183857
Q96IZ0	68.24	x	Par-4 AND (C-terminal or C-terminus)	11714921, 12538889, 19490121, 25195896	4	17	0.235294
P01270	49.57	DP00637	Parathyroid Hormone AND human	10837469, 11604398	2	24877	8.03955e-05
P12272	76.84	DP00138	Parathyroid hormone-related protein	8138348, 10050767	2	4240	0.000471698
P9WIJ9	18.6	x	ParB	21839743	1	279	0.00358423
Q9KJ82	34.21	DP00529	parG AND (N-terminal OR N-terminus)	14622405, 15951570	2	16	0.125
Q96262	71.11	x	PCaP1	18664522, 20448467	2	8	0.25
Q61140	36.16	x	P130Cas AND CasSD	23827411, 24722239	2	6	0.333333
P22239	100.0	DP00112	PCC6 OR Dsp16	9067253	1	7	0.142857
P38936	44.51	DP00016	(p21(Cip1) OR p21 OR Cyclin-dependent kinase inhibitor 1)	8876165, 12964161, 16270364, 18627125, 19165719, 21358637, 21634433, 22399317, 22988851, 23029651	10	29902	0.000334426
P9WGM2	20.0	DP00247	pdtaR	15341725	1	3	0.333333
Q9RHW0	5.36	DP00738	Pectate lyase	11717490	1	638	0.0015674
Q9LXB8	95.41	x	(PELPK1 OR At5g09530)	21559969	1	2	0.5
P81058	4.88	DP00373	Penaeidin-3a	12842879	1	2	0.5
P48539	91.94	x	PEP-19	19106096, 20973509, 23204517	3	64	0.046875
P19021	8.74	x	peptidylglycine alpha-amidating monooxygenase	19635792	1	484	0.00206612
Q7RSH5	7.14	DP00745	Peptidyl-prolyl cis-trans isomerase	17125854	1	6121	0.000163372
P0C2E9	4.8	DP00280	Perfringolysin O	10555145, 15797734	2	233	0.00858369
P17810	4.64	DP00220	Peripherin-2	16522184	1	32	0.03125
P07598	8.31	DP00108	Periplasmic hydrogenase large subunit	10368269	1	23	0.0434783
Q9Y9L0	11.2	DP00037	peroxiredoxin AND Aeropyrum pernix	16214169	1	8	0.125
P37231-2	6.92	DP00718, DP00718_A001	Peroxisome proliferator-activated receptor gamma	19043829, 21620710	2	15469	0.000129291
P40855	48.83	x	Pex19	25062251	1	95	0.0105263
P50542-3	24.56	DP00472	(Pex5p OR peroxisomal cycling receptor)	16403517	1	182	0.00549451
P22621	10.29	x	(PfAMA1 OR (plasmodium falciparum AND "apical membrane antigen 1"))	12270711	1	248	0.00403226
Q25733	28.56	DP00746	PfEMP1	18773118	1	404	0.00247525
Q3YL59	21.32	x	PFMG1	23865482	1	2	0.5
Q07412	2.82	DP00614	(PfTIM OR triosephosphate isomerase) AND plasmodium falciparum	19914198	1	31	0.0322581
Q9UBK2	32.08	x	PGC-1alpha AND “activation domain”	22049338, 23648480, 23884631	3	44	0.0681818
Q88HS5	15.81	x	PhaF	23457638	1	64	0.015625
F1ZCA0	71.26	x	phasin AND "Novosphingobium nitrogenifigens"	22582058	1	1	1
P27001	10.29	DP00053	Phenylalanyl-tRNA synthetase alpha chain	7664121, 9016717	2	12	0.166667
P0AFJ5	12.23	x	phob	17313959	1	354	0.00282486
Q08209	20.35	DP00092	phosphatase 2B subunit alpha	8524402	1	62	0.016129
P10688	10.85	DP00055	1-phosphatidylinositol-4,5-bisphosphate phosphodiesterase delta-1	8602259, 8784353	2	86	0.0232558
P78356	15.87	DP00054	Phosphatidylinositol-4-phosphate 5-kinase type II beta	9753329	1	9	0.111111
P26678	38.46	x	(Phospholamban OR PLN)	25251363	1	2847	0.000351247
P12359	21.99	DP00188	((photosystem II OR PSII) AND manganese stabilizing protein OR "Oxygen-evolving enhancer protein 1")	9890923, 10569936, 10675525, 12146968, 16049787, 16170637, 16228381, 16503666, 21316983, 23940038, 24437616	11	160	0.06875
O14832	6.51	DP00327	Phytanoyl-CoA dioxygenase	16186124	1	7	0.142857
Q9NWS0	27.59	x	Pih1	23139418	1	26	0.0384615
Q07932	22.32	DP00567	Pilosulin-1	15639237	1	7	0.142857
Q13526	49.69	x	pin1	17892493	1	1054	0.000948767
O70161	26.48	x	PIPKIgamma661	19287005	1	6	0.166667
P49918	45.25	DP00017	p57Kip2	11746698	1	292	0.00342466
P19525	21.23	x	(PKR OR protein kinase R)	19232355	1	21830	4.58085e-05
Q03133	9.21	x	(PKS OR modular polyketide synthase)	22282160	1	2214	0.000451671
P00747	8.89	DP00191	Plasminogen	15299951	1	47732	2.09503e-05
P05121	6.72	DP00320	Plasminogen activator inhibitor 1	7664104	1	10218	9.78665e-05
P53350	10.12	DP00428	PLK1	14592974	1	1171	0.000853971
P29590	24.94	x	PMLII	19088278	1	3	0.333333
E7Q6S2	12.25	x	Pml1p	18809678, 19010333	2	6	0.333333
Q9XES8	66.29	DP00665	(PM28 OR GmPM28)	20071374	1	4	0.25
P01139	46.06	x	(pNGF OR pro-Nerve Growth Factor OR proNGF)	16856872, 19089979, 21818348	3	219	0.0136986
Q96QC0	45.96	x	PNUTS	24591642	1	33	0.030303
P03300	2.26	x	poliovirus 3AB	23908350	1	59	0.0169492
P03305	11.41	DP00573	polyprotein foot-and-mouth disease virus	2537470, 6194313	2	140	0.0142857
Q6IBA2	74.8	DP00501	(positive cofactor 4 OR PC4) AND Human	16605275	1	498	0.00200803
P08510	14.5	DP00267	Potassium voltage-gated channel protein Shaker	2122519	1	631	0.00158479
P14859	26.38	DP00231	POU domain AND class 2 AND transcription factor	11380252	1	99	0.010101
Q64693, Q16633	33.98, 33.98	DP00008, DP00172	POU domain class 2-associating factor 1	10329190, 10541551, 11380252	3	3	1
P37231	8.51	x	PPARgamma	16823031	1	15073	6.63438e-05
P17767	8.44	x	P1 protease	24603811	1	3149	0.000317561
Q9VXX1	55.66	x	PPYR1 OR CG15031	16631104	1	7	0.142857
O60828	56.23	x	(PQBP-1 OR “polyglutamine tract binding protein 1”)	19303059, 22500761, 23649393	3	162	0.0185185
U5Y3Y2	74.66	x	precol-NG AND "mussel byssus"	23947342	1	2	0.5
Q6VBP1	7.25	x	preS1	17766372, 23851574	2	365	0.00547945
P58743	2.55	x	prestin	24453323	1	290	0.00344828
Q06253	24.66	DP00288	Prevent host death protein	9915794, 18757857, 20603017	3	373	0.0080429
A1Z6W3	30.64	x	prickle AND PET domain	19053268	1	6	0.166667
P06401	23.9	x	progesterone receptor AND CTE	19553667, 21803119, 23995840	3	6	0.5
P9WHN4	90.62	DP00293	(“prokaryotic ubiquitin-like protein”)	19580545, 19607839, 20636328, 20953180, 23198822, 23557784, 23601177	7	69	0.101449
P45577	53.88	DP00377	ProP effector	15476391	1	4	0.25
Q15185	45.62	DP00358	Prostaglandin E synthase 3	10543959, 10811660	2	1038	0.00192678
P15309	6.22	DP00628	("prostatic acid phosphatase")	10639192, 19995078	2	1647	0.00121433
P01094	85.29	DP00179	Protease A Inhibitor 3	10655612	1	38105	2.62433e-05
Q9UM07	7.69	DP00321	Protein-arginine deiminase type-4	15247907	1	10	0.1
Q9UKV8	15.13	DP00736	Protein argonaute-2	22539551	1	255	0.00392157
Q6P8Z1	51.18	DP00564	Protein B-Myc	16893186	1	15	0.0666667
P27577	14.32	DP00111	Protein C-ets-1	9770451, 15994560	2	1114	0.00179533
P09372	32.99	DP00103	Protein grpE	9103205	1	561	0.00178253
P10644	13.91	x	("protein kinase A")	17222345, 23946424, 24192038	3	14902	0.000201315
P17252	8.04	x	Protein kinase C alpha V5 domain	23762412	1	5	0.2
Q51912	47.84	DP00121	Protein L precursor	9007989	1	7035	0.000142146
P04324, P03406	22.82, 27.18	DP00189, DP00048	Protein Nef	10339411	1	3009	0.000332336
P11845, P41236, Q8R3G1	60.98, 72.2, 30.2	DP00232	(Protein phosphatase inhibitor 2 OR PP1 I-2)	6245879, 10807923, 17636256, 18954090, 20826336	5	180	0.0277778
O60927	69.05	DP00219	Protein phosphatase 1 regulatory subunit 11	9843442	1	36	0.0277778
P01099	100.0	DP00325	Protein phosphatase 1 regulatory subunit 1A	208844	1	7	0.142857
Q90623-2	45.38	DP00218	(Protein phosphatase 1 regulatory subunit 12A OR MYPT1)	15164081, 21142030	2	370	0.00540541
P07516	85.15	DP00421	Protein phosphatase 1 regulatory subunit 1B	6319628	1	7	0.142857
P40357	43.16	DP00128	Protein transport protein SEC9	9326367, 10048921	2	32	0.0625
P60058	13.24	DP00117	Protein transport protein Sec61 subunit gamma	8942632	1	8	0.125
Q93096	8.09	DP00255	Protein tyrosine phosphatase type IVA 1	15213447	1	6	0.166667
O75365	10.4	DP00254	Protein tyrosine phosphatase type IVA 3	14704153	1	4	0.25
x	x	x	proteoglycans syndecans	24956062	1	2090	0.000478469
P06302	100.0	DP00058	prothymosin alpha	7548085, 10555983, 10631119, 12062405, 12582818, 16628001, 17355803, 17929838, 17949994, 22125611, 23050820, 23189168, 23318954, 23359453	14	377	0.0371353
P11309-2	8.63	DP00322	Proto-oncogene serine/threonine-protein kinase Pim-1	15525646	1	538	0.00185874
Q6P2Q9	5.35	x	Prp8	24643059	1	153	0.00653595
P35820	45.03	x	(PSC OR posterior sex combs)	22517748	1	4066	0.000245942
P78352	8.84	x	(PSD-95 OR Post Synaptic Density 95)	16601002, 17666528	2	1744	0.00114679
P19243	29.11	DP00676	PsHSP18.1	19717454	1	3	0.333333
P60484	19.85	x	PTEN	23783762, 24056727	2	9534	0.000209776
P18031	24.6	x	PTP1B	24845231	1	1232	0.000811688
H0USY9	24.73	x	PulS	21878629	1	516	0.00193798
Q9BXH1	53.89	x	PUMA	23301700, 24654952, 25313042	3	1997	0.00150225
P48539	91.94	DP00592	(Purkinje cell protein 4 OR PEP19)	19106096, 20973509, 23204517	3	2220	0.00135135
Q9N607	12.32	x	(PvAMA-1 OR Plasmodium Vivax Apical Membrane Antigen 1)	21713006	1	68	0.0147059
Q02597	6.04	DP00560, DP00560_C007	PVY AND potato virus	17971447	1	365	0.00273973
Q01144	63.45	x	PWL2 OR PWL2D	20438845	1	9	0.111111
O75469	12.44	DP00323	PXR receptor AND human	11408620	1	1030	0.000970874
P0AFI7	11.93	DP00165	Pyridoxine-5'-phosphate oxidase	12824491	1	78	0.0128205
Q9NVS9	16.09	DP00168	Pyridoxine/pyridoxamine 5'-phosphate oxidase	15858270	1	3	0.333333
P37362	90.0	x	pyrrhocoricin	15478127	1	24	0.0416667
P0AFG8	4.96	DP00427	Pyruvate dehydrogenase E1	11955070	1	1159	0.000862813
Q32NN2	22.58	DP00286	quaking-A protein	15811367	1	258	0.00387597
P22363	30.3	x	rabies virus phosphoprotein	19341745	1	164	0.00609756
P37727	16.92	DP00458	Rab proteins geranylgeranyltransferase component A 1	11886217, 12620235	2	8	0.25
P31751	9.98	DP00304	RAC-beta serine/threonine-protein kinase	12086620, 12517337	2	5	0.4
P43351	32.54	DP00437	RAD52 homolog DNA repair protein	12370410	1	63	0.015873
P04049	15.28	DP00171	RAF kinase	7766599, 7791872, 8710867, 8756332	4	11589	0.000345155
P10114	12.02	DP00167	Rap-2a	9312017, 10591105	2	3	0.666667
P11938	30.71	DP00020	RAP1 AND DNA	8620531	1	539	0.00185529
P51449	20.85	x	RAR gamma AND (N-terminal OR N-terminus)	24333369	1	22	0.0454545
P63000	5.21	DP00408	Ras-related C3 botulinum toxin substrate 1	14625275	1	4520	0.000221239
P11233	34.47	DP00581	Ras-related protein Ral-A	15530367	1	6	0.166667
Q9A3A9	24.85	x	RcdA	19747489	1	230	0.00434783
P9WHJ3	7.22	x	recA intein AND Mycobacterium tuberculosis	16288917	1	31	0.0322581
P18754	9.26	DP00691	Regulator of chromosome condensation	9510255, 20347844	2	140	0.0142857
P49799	27.32	DP00063	Regulator of G-protein signaling 4	9108480	1	846	0.00118203
P03040	30.3	DP00741	Regulatory protein cro	2146682, 6452580, 7500341, 9653036, 9653037	5	330	0.0151515
P9WHG9	8.54	x	(RelA OR SPoT) AND (C-terminus OR C-terminal)	24717772	1	375	0.00266667
P27694	13.8	DP00061	Replication protein A AND 70	10526407	1	137	0.00729927
Q9NQC3-2	31.9	DP00524	(Reticulon-4 OR RTN 4B)	17397058	1	600	0.00166667
P04972	79.31	DP00638, DP00347	(retinal OR cGMP) AND phosphodiesterase AND “gamma subunit”	12643535, 18230733, 19075750, 21393250, 21978030, 22514270	6	287	0.0209059
P62965	12.41	DP00340	Retinoic acid receptor RXR-alpha	9698548, 9826495	2	1745	0.00114613
O54828	27.11	x	(RGS9-2 OR Regulator of G-protein signaling 9)	20095651	1	125	0.008
x	x	x	Rhabdoviridae AND nucleoprotein	20450482	1	613	0.00163132
x	x	x	Rhabdoviridae AND phosphoprotein	20450482	1	433	0.00230947
P02699	13.51	DP00271	rhodopsin	10926528, 23883288	2	8760	0.000228311
Q07960	24.6	DP00459	Rho GTPase	9009196	1	11298	8.85112e-05
O28362	13.73	DP00382	Ribonuclease P protein component 1	15518563	1	53	0.0188679
P11157	10.51	DP00462	Ribonucleoside-diphosphate reductase M2 subunit	7589490, 8130196, 8876648	3	74	0.0405405
P49723	10.72	DP00488	Ribonucleoside-diphosphate reductase small chain 2	11526233	1	4	0.25
P09938	18.3	DP00487	Ribonucleoside-diphosphate reductase small chain 1	11526233	1	5	0.2
P69924	9.57	DP00107	Ribonucleoside-diphosphate reductase 1 subunit beta	8805591	1	9	0.111111
B0B899	30.63	x	ribosomal protein L2	21592750	1	89	0.011236
P60723	28.86	DP00600	ribosomal protein L4	1618378, 19399222	2	168	0.0119048
P56210	27.82	DP00512	ribosomal protein L11	8989327, 9398519	2	277	0.00722022
P0A7N9	100.0	DP00143	ribosomal protein L33	3297162	1	74	0.0135135
P05318	40.57	DP00164	ribosomal protein P1-alpha	10913306	1	3	0.333333
Q9HFQ6	46.3	DP00001	ribosomal protein P1-B	15182941	1	1	1
P02400	54.55	DP00002	ribosomal protein P2-beta	9236009, 10913306	2	8	0.25
B9JVV3	19.02	x	ribosomal protein S4	21156135, 22458631	2	205	0.0097561
P0AG63	16.67	DP00242	ribosomal protein S17	6751823	1	45	0.0222222
P08865	30.85	x	ribosomal protein SA AND human	22640394, 23137297	2	58	0.0344828
P16083	6.49	DP00727	Ribosyldihydronicotinamide dehydrogenase	16302811	1	105	0.00952381
Q22472	56.08	DP00613	RIC-3	19899809	1	51	0.0196078
Q6PR54	22.57	x	Rif1	24634216	1	170	0.00588235
P0AEM6	12.97	x	RNA Polymerase AND Escherichia coli	25261014	1	11148	8.97022e-05
Q9Y5B0	40.27	DP00177	RNA polymerase II subunit A C-terminal domain phosphatase OR FCP1	12732728, 19888685, 21672523, 21988473	4	121	0.0330579
Q9A749	26.17	x	("Rnase E" AND caulobacter crescentus)	20952404	1	3	0.333333
P21513	28.84	DP00207	(“RNase E” AND (escherichia coli OR e. coli))	15236960, 16516921, 17447862	3	496	0.00604839
P25814	43.1	DP00387	(“RNase P” OR “ribonuclease P” ) AND bacillus subtilis	11258888, 20476778	2	157	0.0127389
O31774	17.88	x	("RNase Y") AND Bacillus subtilis	21803996	1	16	0.0625
P78317	37.89	x	RNF4 ubiquitin ligase	24844634	1	64	0.015625
S8GC24	38.75	x	ROP6	24993791	1	19	0.0526316
P11171	37.5	DP00678	(4.1R OR "Protein 4.1")	20109190	1	704	0.00142045
Q8GYN5	69.19	x	RPM1-interacting protein 4	25039985	1	9	0.111111
Q03465	32.02	x	Rpn4	22349505	1	65	0.0153846
P9WIP5	21.13	x	Rv2377c	20434955	1	1	1
P9WPQ1	15.49	x	Rv3221c	18004752	1	1	1
Q9CQK7	50.62	DP00587	(Rwdd1 OR RWD domain-conatining protein 1)	18954556	1	4	0.25
Q8N488	78.51	DP00694	RYBP	19170609	1	57	0.0175439
P21817	11.49	x	RyR1	22937102	1	5680	0.000176056
P0AEI4	6.35	x	S12	24442609	1	2307	0.000433463
P26447	21.78	x	S100A4	24098542	1	899	0.00111235
P33764	19.8	x	S100A3	24098542	1	45	0.0222222
P80511	13.04	x	S100A12	24098542	1	331	0.00302115
P29034	16.33	x	S100A2	24098542	1	195	0.00512821
P06703	14.44	x	S100A6	24098542	1	410	0.00243902
P0DJI8	24.59	x	(SAA OR serum amyloid A)	22448726	1	6478	0.000154369
P22470	42.46	x	San1	21211726, 23363599	2	29	0.0689655
P05109	16.13	x	(S100A8 OR S100A9)	24098542	1	1466	0.000682128
P07602	10.69	DP00733_C004	Saposin-C	14674747, 15713488, 16823039, 18462685	4	635	0.00629921
Q19QV9	23.47	x	(“SARS coronavirus” AND (“nucleocapsid protein” OR “nucleocapsid phosphoprotein”))	16228284, 23717688	2	368	0.00543478
Q20010	60.4	x	SAS-5	24778935	1	39	0.025641
P04271	25.0	x	S100B	24098542	1	1667	0.00059988
C4MN95	80.69	x	(SbASR-1 OR Abscisic acid stress ripening protein)	22639284	1	63	0.015873
C0J347	28.88	x	(SBDS OR TcSBDS) AND Trypanosoma cruzi	19121363	1	1	1
Q931F4	40.85	x	Sbi-III	18550524	1	1	1
Q96T21	37.0	DP00420	(SBP2 OR SECIS binding protein 2)	11238886, 19467292	2	142	0.0140845
P23389	50.93	DP00124	Secretogranin-1	9136897	1	413	0.00242131
P40316, O95997	69.44, 71.78	DP00256, DP00521	(securin OR PTTG1 OR pituitary transforming gene 1 product) AND (N-terminal OR N-terminus)	12220679, 15929994, 19053469	3	25	0.12
Q68FT9	7.64	DP00620	Selenocysteine lyase	20164179	1	71	0.0140845
Q9BQE4	45.5	x	(“selenoprotein s” OR SelS OR VIMP)	22700979, 23566202, 23914919	3	2084	0.00143954
O94742	47.19	x	Sem1	24412063	1	33	0.030303
P02783	83.93	DP00527	(Seminal vesicle protein number 4 OR SV-IV)	18215165, 19851073	2	153	0.0130719
Q9EB08	20.28	x	(SeMV OR "sesbania mosaic virus") AND polyprotein 2a	19995563	1	4	0.25
Q07097	16.98	DP00629	(“sendai virus”) AND nucleoprotein	17459940, 20450486	2	191	0.0104712
P04859	52.11	x	(“sendai virus”) AND phosphoprotein	14980481, 16284250, 17459940, 17586564, 20450486	5	308	0.0162338
O43236	23.01	x	sept4	21949740	1	79	0.0126582
O43236	23.01	DP00537	SEPT4 AND septins	17105210	1	74	0.0135135
O75920	65.45	x	SERF1a	22854022	1	7	0.142857
O86488	31.79	DP00065	Serine-aspartate repeat-containing protein D	9813018	1	2	0.5
O43464	6.99	DP00315	Serine protease HTRA2 AND mitochondria*	11967569	1	231	0.004329
P53041	10.82	DP00365	Serine/threonine protein phosphatase 5	15713458	1	68	0.0147059
P31645	5.56	x	(SERT OR serotonin transporter)	21129485	1	8514	0.000117454
P02768	11.82	DP00515	("serum albumin") AND human	10388840	1	42565	2.34935e-05
P11831	36.02	DP00574	serum response factor	11406578	1	24776	4.03616e-05
P34945	15.91	DP00514	Seryl-tRNA synthetase	8128220, 8230201, 8654381	3	258	0.0116279
O75533	12.27	x	SF3b155	24795046	1	23	0.0434783
x	x	x	Sfbl-5	21840989	1	2	0.5
Q86XK3	35.92	x	sfr1	23324799	1	35	0.0285714
P10824	15.82	DP00035	S-Gi alpha 1	8073283	1	1	1
P35187	26.88	x	Sgs1 helicase	24038467	1	323	0.00309598
P29353	30.19	DP00154	SHC-transforming protein 1	12906822	1	1430	0.000699301
U5Y0K9	25.95	x	shematrin	25001481	1	5	0.2
Q9Y3R4	21.05	DP00261	Sialidase-2	15501818	1	5	0.2
P38634	57.75	DP00631	Sic1 AND CDK	11734834, 17522259, 17660831, 19008353, 19280601, 20399178, 20399186, 20589454, 21053335, 21539793, 22356687, 23189058, 24673507	13	87	0.149425
P0AFX7	43.98	DP00552	Sigma-E factor negative regulatory protein	18421143	1	16	0.0625
P03087	27.9	DP00182	Simian virus Major capsid protein VP1	1659663, 8805523	2	79	0.0253165
Q5VVH5	33.08	x	SIMPL	17233114	1	23	0.0434783
P27285	9.96	DP00066, DP00066_C001	sindbis virus AND capsid protein	1944569	1	195	0.00512821
P50263	86.08	x	SIP18	21420397	1	11	0.0909091
P06701	15.54	DP00533	(Sir3p OR silent information regulator 3 protein OR SIR3) AND saccharomyces cerevisiae	2121770, 16581798, 16641491, 17176117, 22096199	6	385	0.0155844
Q96EB6	31.06	x	sirt1 AND (N-terminal OR N-terminus OR C-terminal OR C-terminus)	23497088, 23811471, 24020004	3	83	0.0361446
P25294	53.12	x	Sis1 AND yeast	23227221	1	80	0.0125
Q13573	49.63	DP00608	(SKIP OR Ski interaction protein) AND SNW	20007319	1	16	0.0625
P52285	27.16	x	skp1	24506136	1	918	0.00108932
Q9VAN6	63.41	DP00144	SLBP OR (Histone RNA hairpin-binding protein)	15260482, 23286197, 25002523	3	111	0.027027
Q57733	14.29	DP00067	Small heat shock protein HSP16.5	9707123	1	28	0.0357143
P32566	32.87	x	(small molecule reductase regulatory protein OR SmI1 OR knr4)	19086274	1	131	0.00763359
P22531	59.72	DP00130	Small proline-rich protein 2E	3133554, 9722562	2	249	0.00803213
Q6DIC0	34.12	x	SMARCA2	15368101	1	301	0.00332226
Q9H0W8	31.15	x	SMG-9	20817927	1	5	0.2
P19972	12.61	DP00180, DP00180_C003	SMK toxin	9089808	1	6	0.166667
Q99LM3	70.81	DP00742	(Smoothelin-like protein 1 OR SMTNL1)	18310078, 18477568, 22424482, 24905744	4	13	0.307692
O95149	21.11	x	snurportin	19619473	1	23	0.0434783
P63292	21.7	DP00125	Somatoliberin	9375414	1	6955	0.000143781
O30916	12.12	x	SopB	24075929	1	200	0.005
Q9S446	36.89	DP00208	sortase	11371637, 15117963, 22468560	3	528	0.00568182
Q99523	3.85	x	Sortilin	18191449	1	387	0.00258398
Q08826	14.2	DP00482	Sorting nexin-3	14514667	1	9	0.111111
Q07889	20.63	x	Sos1	23528987	1	515	0.00194175
P03607	18.28	DP00064	southern bean mosaic virus capsid protein	6854633	1	36	0.0277778
P08047	24.59	DP00378	Sp1	15609997, 19292861	2	9875	0.000202532
x	x	x	(SPA OR septal pore associated proteins)	22955885	1	8059	0.000124085
P07214	15.23	DP00052	SPARC	3427055	1	2696	0.00037092
A1Z0H7	38.52	x	Spatzle	12872120	1	127	0.00787402
G2TRL7	41.18	x	spd2	24652833	1	22	0.0454545
Q10585	52.42	x	spd1	20516199, 20556825, 24652833	3	42	0.0714286
P15340	96.77	DP00057	Sperm histone	2243113, 2738040	2	1664	0.00120192
Q96SB3	46.38	x	spinophilin	18028445	1	256	0.00390625
x	x	x	split intein	24236406	1	171	0.00584795
O34800	58.93	x	SpoIISB	21147767	1	5	0.2
x	x	x	src family kinase	25071818	1	11278	8.86682e-05
P0A7L8	45.88	DP00140	50S ribosomal protein L27	3297162, 11673426	2	6	0.333333
P0A7S3	22.58	DP00145	30S ribosomal protein S12	6751823	1	17	0.0588235
P0A7T7	18.67	DP00146	30S ribosomal protein S18	6751823	1	7	0.142857
P0A7U3	34.78	DP00147	30S ribosomal protein S19	6751823	1	10	0.1
P09132	45.83	DP00570	SRP19	17434535	1	86	0.0116279
P0AGE2	38.76	DP00722	SSB AND (escherichia coli OR e. coli) AND (C-terminal OR C-terminus)	15169953, 20360609, 24021816	3	66	0.0454545
Q9FD10	3.92	x	(SseJ OR SseJ-H OR SseJ-L) AND salmonella	20877914	1	31	0.0322581
Q9UWU0	0.0	x	Sso Acp	24893801	1	8	0.125
O75324	12.5	DP00162	Stannin	16246365	1	21	0.047619
A2VD23	100.0	DP00584	starmaker	18636772, 19635593, 22821534	3	9	0.333333
P02808	43.55	x	statherin	15892946	1	193	0.00518135
P16949	100.0	DP00174	stathmin	10675326, 12860982, 16554300, 17029844, 17034249	5	867	0.00576701
Q7Z626	18.17	x	STIL	24022511	1	161	0.00621118
Q2M3R5	5.75	x	Stim1	24650897	1	876	0.00114155
Q7CL96	13.62	DP00302	stringent starvation protein A	15735307	1	7	0.142857
P0AFZ3	42.42	DP00194	(stringent starvation protein B OR SspB)	14536075	1	147	0.00680272
P04189	12.86	DP00394	subtilisin AND (propeptide OR pro-peptide)	11519747, 15740747, 23009354	3	166	0.0180723
Q9UMX1	16.74	x	SUFU	24311597	1	241	0.00414938
P55789	34.63	x	sulfhydryl oxidase ALR	23207295	1	33	0.030303
P38038	8.35	DP00190	("sulfite reductase") AND NADPH	10860732	1	94	0.0106383
P0DMM9	9.49	DP00011	Sulfotransferase 1A3/1A4	10543947	1	3	0.333333
O00204, O00204-2	27.95, 27.71	DP00404, DP00404_A002	(SULT2B1 OR SULT2B1b OR Sulfotransferase family cytosolic 2B member 1)	12923182	1	74	0.0135135
Q9UBE0	19.65	DP00485	SUMO-activating enzyme subunit 1	15660128	1	5	0.2
Q9UBT2	18.28	DP00486	SUMO-activating enzyme subunit 2	15660128	1	3	0.333333
P00441	29.87	DP00652	("Superoxide dismutase")	19800308	1	58522	1.70876e-05
O31851	16.84	DP00257	superoxide dismutase-like yojM	15897454	1	158	0.00632911
O95425	32.79	x	supervillin	23075227	1	35	0.0285714
O35718	28.89	DP00446	Suppressor of cytokine signaling 3	16302975	1	3127	0.000319795
Q8NHG7	100.0	x	SVIP	24055875	1	13	0.0769231
P40688	33.94	x	Swallow AND cytoplasmic dynein	25263009	1	5	0.2
P31109	34.19	DP00113	Synaptobrevin homolog 1	9326367	1	27	0.037037
P63045, P63027	43.1, 43.97	DP00622, DP00069	(synaptobrevin OR Vesicle-associated membrane protein 2)	9346956, 19918058, 21481779	3	2159	0.00138953
A7UMX5	66.67	DP00535	Synaptopodin 2 variant OR Fesselin	17676886, 18457655	2	15	0.133333
P60881	29.61	DP00068	Synaptosomal-associated protein 25	9671503	1	1413	0.000707714
P18827	50.32	x	syndecan-1	23888783	1	1484	0.000673854
P32851	19.44	DP00155	Syntaxin-1A	12680753	1	1104	0.000905797
P26039	20.31	DP00653	Talin-1	19804783	1	60	0.0166667
P10636-8	72.11	DP00126	Tau AND (protein OR alzheimer’s OR tauopathies OR neuronal)	10995239, 11606569, 11807946, 12358741, 14769047, 15615633, 15628855, 15855160, 15925383, 16464864, 16475817, 16515451, 16908029, 17047358, 17081491, 17241479, 17262987, 17385861, 17493042, 18061582, 18495933, 18725412, 18725924, 18771286, 18783251, 18834853, 18953106, 19075586, 19149675, 19214739, 19226187, 19549281, 19625749, 19769346, 19826005, 20160453, 20184958, 20678071, 20687558, 21056617,…	65	20253	0.0032094
P03409	13.31	x	Tax AND HTLV transcriptional activator	14580193	1	146	0.00684932
E7AIJ0	7.37	x	TB1-C-Grx1	24830542	1	1	1
Q6SJ96	29.87	x	TBPL2	17570761	1	12	0.0833333
P01730	8.52	DP00123	T-cell surface glycoprotein CD4	9622505	1	16415	6.09199e-05
P04234	5.85	DP00505	T-cell surface glycoprotein CD3 delta chain	14967045, 17176095	2	533	0.00375235
P07766	21.74	DP00506	T-cell surface glycoprotein CD3 epsilon chain	14967045, 17176095	2	321	0.00623053
P09693	15.93	DP00508	T-cell surface glycoprotein CD3 gamma chain	14967045, 17176095	2	1278	0.00156495
P20963	38.41	DP00200	T-cell surface glycoprotein CD3 zeta chain	14967045, 17174464, 17176095, 17410622, 19012413, 19733547, 21487502, 24120941	8	713	0.0112202
Q9C518	43.14	x	TCP8	23760157	1	10	0.1
P19250	4.23	DP00668	(TDH OR thermostable direct hemolysin) AND Vibrio parahaemolyticus	20335168	1	430	0.00232558
Q13148	18.36	x	TDP-43	23962724, 24497973	2	1497	0.00133601
B7T1D7	15.44	DP00703	Teg12	20361791	1	2	0.5
P16458	50.39	DP00659	Telomere-binding protein subunit beta	9201953, 17082188	2	20	0.1
A0A077Y0G0	18.42	x	(Tex1 OR Trophozoite exported protein 1)	23056243	1	26	0.0384615
P04867	23.67	x	TGBp1	19675186, 22349738	2	53	0.0377358
Q8MWS6	39.48	DP00500	TgDRE	16605254	1	2	0.5
S8F3V2	19.19	x	TgGCN5 AND "toxoplasma gondii"	21055425	1	6	0.166667
Q96EK4	32.48	x	THAP11	15368101	1	17	0.0588235
P0AA25	10.09	x	thioredoxin AND (escherichia coli OR e. coli)	12641467, 16113108, 16542678, 16787768	4	1921	0.00208225
Q9BRA2	9.76	x	thioredoxin AND human	17611012	1	4112	0.000243191
Q962Y6	7.19	DP00642	thioredoxin-glutathione reductase AND Schistosoma mansoni	19710012	1	20	0.05
P40238	9.13	x	thrombopoietin receptor MPL	21858098	1	991	0.00100908
Q8GT36	82.52	DP00532	Thylakoid soluble phosphoprotein	17176085	1	7	0.142857
x	x	x	Thylakoid-soluble phosphoprotein AND Arabidopsis thaliana	19113838	1	1	1
P03176	13.56	DP00419	Thymidine kinase	7628623, 9336833	2	13187	0.000151665
P04818	11.5	DP00073	thymidylate synthase	8845352	1	4845	0.000206398
P62328	100.0	DP00357	Thymosin beta-4	8269922, 15039431	2	673	0.00297177
O14925	3.83	x	TIM23	20718036	1	204	0.00490196
P0DJ91	29.93	x	Tir AND "Escherichia coli"	17449672	1	447	0.00223714
Q8WZ42	17.39	DP00072	titin AND (SH3 OR PEVK)	7569978, 9472037, 16766517, 16949547, 22910563, 23062340, 23063534	7	133	0.0526316
Q12000	52.46	x	Tma46	23002146	1	3	0.333333
Q9HCJ0	36.27	x	tnrc6c	23340509	1	14	0.0714286
Q14106	30.52	x	Tob2	23340509	1	38	0.0263158
O81283	25.02	DP00609	Toc159	20042108, 21057194	2	72	0.0277778
O94826	22.04	x	Tom70	15316022	1	144	0.00694444
P23627	22.71	x	tomato aspermy virus cucumovirus coat	20056465	1	19	0.0526316
P02929	48.95	DP00043	tonB	15644214	1	905	0.00110497
Q9BW30	47.73	x	(Tppp3 OR tubulin polymerization-promoting protein family member 3)	19235716	1	9	0.111111
O94811	42.47	x	TPPP/p25	15474353, 15567525, 15883183, 17105200, 23166627	5	34	0.147059
x	x	x	TRAF3IP2	24021976	1	108	0.00925926
P33905	7.69	DP00198	Transcriptional activator protein traR	11171981	1	34	0.0294118
P15884	48.88	DP00224	("Transcription factor 4") AND human	11237626, 23821606	2	701	0.00285307
Q9NQB0	40.06	DP00175	("Transcription factor 7-like 2")	11237626, 11713476	2	844	0.00236967
Q04207, Q04206	24.23, 29.22	DP00085, DP00129	(Transcription factor p65 OR NF-kappab p65)	9384558, 12686541, 21220295	3	10649	0.000281717
P32773	40.56	DP00104	Transcription initiation factor IIA large subunit	8610010	1	23	0.0434783
P32774	13.93	DP00009	Transcription initiation factor IIA small subunit	8610010	1	32	0.03125
P51123	34.62	DP00081	Transcription initiation factor TFIID subunit 1	9741622	1	33	0.030303
Q8NER1	6.44	x	(transient receptor potential OR TRPV1)	22575650	1	11105	9.00495e-05
Q01853	13.4	DP00435	Transitional endoplasmic reticulum ATPase	15740751	1	36	0.0277778
P0A707	34.44	DP00197	Translation initiation factor IF-3	9054966	1	50	0.02
Q9SLF3	28.28	DP00610	translocase of chloroplast 132	20042108	1	2	0.5
Q498R8	30.29	x	(translocated promoter region protein OR Traf3ip2)	21216290	1	481	0.002079
Q53WY6	34.09	x	Transthyretin	15477096	1	6607	0.000151355
P96086	2.24	DP00484	Tricorn protease	11719810	1	27	0.037037
P00942	4.84	DP00430	triosephosphate isomerase yeast	2402636, 3430618	2	186	0.0107527
Q13061	90.26	x	Trisk 95	22937102	1	8	0.125
P15502	13.23	x	(tropoelastin OR elastin)	19501564, 24550393, 25142785	3	9861	0.000304229
Q91006	25.63	DP00131	tropomodulin AND (N-terminal OR N-terminus)	11423419, 17706248, 21584876	3	35	0.0857143
P63315	37.89	DP00249	Troponin C AND (slow skeletal OR cardiac muscles)	2933134	1	730	0.00136986
P19429	44.29	DP00166	Troponin I cardiac muscle	12840750, 18433059, 20889975, 21322033	4	2759	0.0014498
I1RJZ4	6.21	x	TRP channel AND (C-terminal or C-terminus)	23553631, 24723374	2	129	0.0155039
Q9H1D0	9.67	x	TRPV6	21664972	1	423	0.00236407
Q9NQA5	7.68	x	TRPV5	21664972	1	343	0.00291545
P47756	11.55	x	TRTK-12	23028280	1	27	0.037037
P82409	29.41	DP00680	Trypsin inhibitor 2	11292835, 11434766	2	13106	0.000152602
P0A877	11.94	DP00252	Tryptophan synthase alpha chain	15667212	1	84	0.0119048
x	x	DP00688	(TTN-1 OR 2MDa_1)	20346955	1	3	0.333333
P04350	8.33	DP00114	Tubulin beta-4 chain	10211825, 24835459, 25307498	3	11	0.272727
P32882	10.79	DP00169	Tubulin beta-2 chain	10211825	1	35	0.0285714
O15350	17.45	DP00319	Tumor protein p73	11264583	1	1283	0.000779423
P41851	17.58	DP00725	Type II secretion system protein M	15081815	1	130	0.00769231
P04177	14.66	DP00094	Tyrosine 3-monooxygenase	8104613	1	13435	7.44325e-05
Q5UPJ7	6.94	DP00726	Tyrosine-tRNA ligase	17855524	1	427	0.00234192
P00952	7.4	DP00095	Tyrosyl-tRNA synthetase	2504923, 12005430	2	491	0.00407332
P09012	36.88	x	U1A	15476390	1	337	0.00296736
P26368	19.58	x	U2AF65	24734879	1	180	0.00555556
P0ABJ1	13.97	DP00089	Ubiquinol oxidase subunit 2	1324168, 8433374, 8618822, 11017202	4	24	0.166667
P0ABI8	4.98	DP00088	Ubiquinol oxidase subunit 1	2162835, 11017202	2	38	0.0526316
Q16222, Q16222-2	7.09, 6.73	DP00363, DP00363_A002	UDP-N-acetylhexosamine pyrophosphorylase	11707391	1	4	0.25
O75385	26.38	x	ULK1	21853163	1	276	0.00362319
P83949	19.54	DP00623	Ultrabithorax AND (N-terminal OR N-terminus OR C-terminal OR C-terminus)	18508761, 22399320, 25286318	3	29	0.103448
Q9GSG8	16.53	x	ultraspiracle AND "aedes aegypti"	24704038	1	20	0.05
P38293	31.08	x	Ump1	24065419, 24688736	2	37	0.0540541
P0AG11	6.47	DP00626, DP00626_C001	UmuD	18216271	1	289	0.00346021
P60472	9.88	DP00516	Undecaprenyl pyrophosphate synthetase	11581264	1	59	0.0169492
Q9HAU5	34.12	x	UPF2	19556969	1	137	0.00729927
P23202	21.75	DP00353	URE2	10224139, 11327838, 15628874	3	265	0.0113208
Q9RP19	8.53	DP00367	(UreG OR urease accessory protein)	15542602, 16846235, 17309280, 21922108, 22271305, 23560717, 25200810	7	154	0.0454545
P06132	10.9	DP00308	Uroporphyrinogen decarboxylase	9564029, 11719352	2	613	0.00326264
P54725	39.12	DP00156	UV excision repair protein RAD23 homolog A	14557549	1	8	0.125
Q8QXJ6	22.02	x	vanilla mosaic virus coat protein	16421638	1	5	0.2
B4F3C5	7.93	x	VapD	25084333	1	29	0.0344828
P12003-1	28.24	DP00556	Vinculin	15642262	1	3131	0.000319387
Q9MA75	45.75	x	VIP1	25212215	1	154	0.00649351
Q98157	9.57	DP00685	Viral macrophage inflammatory protein 2	10595530	1	117	0.00854701
P11473	17.8	DP00184	("Vitamin D3 receptor")	10678179	1	200	0.005
P07293	5.55	DP00228	Voltage-dependent L-type calcium channel subunit alpha-1S	12620094	1	9	0.111111
Q14722-2	7.48	DP00090	Voltage-gated potassium channel subunit beta-1	10585425	1	57	0.0175439
P40337	34.74	DP00287	Von Hippel-Lindau disease tumor suppressor	14963040	1	1064	0.00093985
Q05323	18.4	DP00627	VP30	17567691	1	72	0.0138889
P51610	25.06	x	VP16 AND transcription factor activator	15826952	1	439	0.0022779
P03305	11.41	DP00573_C004	VP2 foot-and-mouth disease virus	2537470	1	123	0.00813008
P03305	11.41	DP00573_C006	VP1 foot-and-mouth disease virus	2537470	1	888	0.00112613
P03305	11.41	DP00573_C005	VP3 foot-and-mouth disease virus	2537470	1	140	0.00714286
Q85197	4.81	x	VPg AND “potato virus”	18533220, 19800647	2	57	0.0350877
P03305	11.41	DP00573_C003	VP4 protein	2537470	1	1453	0.000688231
Q730H9	10.58	x	Vpr AND "Bacillus cereus"	19383694	1	3	0.333333
P03520	31.32	x	(VSVP OR vesicular stomatitis virus phosphoprotein)	22789567	1	327	0.0030581
Q9NZQ3	21.05	x	(WASP interacting protein OR WIP(C))	23060071, 23870269	2	87	0.0229885
P42768	44.42	DP00215	(WASP OR Wiskott-Aldrich syndrome) AND protein AND (C-terminus or C-terminal)	10724160, 15235593, 18650809, 19260013, 20536449, 21875562	6	220	0.0272727
O15213	32.13	x	WDR46	23848194	1	4	0.25
P30291	33.59	DP00611	Wee1	19858290	1	772	0.00129534
Q14191	15.64	DP00443	Werner syndrome ATP-dependent helicase	16339893	1	16	0.0625
P06935	1.75	DP00673, DP00673_C001	west nile virus AND (capsid protein C OR polyprotein)	18033802	1	100	0.01
x	x	x	WSK3	18948596	1	1	1
P80457	5.71	DP00450	Xanthine AND (dehydrogenase OR oxidase)	11005854	1	13452	7.43384e-05
Q23229	23.02	DP00361	XO lethal protein 1	12672694	1	10	0.1
P27088	37.83	DP00091	XPA AND DNA	11344324	1	858	0.0011655
P0A8H9	38.46	DP00202	yacG	12211008	1	6	0.166667
Q6PKI6	59.02	x	(YB-1 OR “Y Box binding protein 1” OR YBX1)	22590640, 24217978	2	915	0.00218579
P23292	28.02	x	Yck2 kinase	21653825	1	32	0.03125
P69346	28.92	x	YefM	14672926, 15980067, 18793646	3	27	0.111111
Q7CJN0	3.85	DP00275	Yersinia crystallin	15536081, 16470515	2	3	0.666667
P31493	26.48	x	YopE	18502763	1	250	0.004
P46937	51.59	DP00702	(Yorkie homolog OR YAP1)	20123905, 20368466	2	672	0.00297619
P20963	38.41	x	(zetacyt OR T-cell surface glycoprotein CD3 zeta chain)	18311971	1	709	0.00141044
O95405	17.19	DP00141	Zinc finger FYVE domain containing protein 9	15231848	1	1	1
O00488	58.96	DP00549	Zinc finger protein 593	18287285	1	15	0.0666667
Q9H2S9	45.47	DP00376	Zinc finger protein Eos	15491138	1	19	0.0526316
P77173	42.07	DP00161	ZipA	12107152, 23660966	2	110	0.0181818

## Sheet: RAPID
RAPID score	fract IDP PMIDs
100	0.00808625
100	0.190476
100	0.0416667
100	0.0625
100	0.25
100	0.2
100	0.0625
100	0.5
100	1
100	0.285714
100	0.142857
100	0.0371353
100	0.0204082
100	0.666667
100	0.333333
100	0.0769231
100	0.0869565
100	0.0714286
100	0.0140845
100	0.0133333
100	0.0133333
100	0.00576701
100	0.142857
100	0.0019861
100	0.0187793
100	2.97885e-05
100	1
100	0.0344828
100	0.0135135
100	0.0232558
100	0.0952381
100	0.2
100	0.000396983
100	0.2
100	0.00297177
97.48	0.5
97.2	0.333333
96.77	0.00120192
95.51	0.6
95.41	0.5
95.36	0.00576037
94.62	0.25
94.38	0.00576037
94.07	0.0046083
93.85	0.285714
93.39	0.00537634
92.64	0.000286246
91.94	0.00135135
91.94	0.046875
91.7	0.000191498
90.62	0.101449
90.43	0.181818
90.3	0.00420168
90.26	0.125
90	0.0416667
89.88	0.0714286
88.24	0.0909091
87.32	0.2
86.98	0.222222
86.32	1
86.08	0.0909091
85.78	0.0384615
85.29	0.0241935
85.29	2.62433e-05
85.15	0.142857
84.8	0.166667
84.29	0.0238095
83.93	0.285714
83.93	0.0130719
83.77	0.222222
83.76	1
83.7	0.142857
83.2	0.0441176
82.52	0.142857
81.03	0.2
80.69	0.015873
80.47	0.000267809
80.47	0.00034002
80.39	0.166667
80.35	0.5
80.08	0.125
79.31	0.0209059
78.51	0.0175439
78.39	0.0063593
77.35	0.1
77.06	0.038835
76.84	0.000471698
76.61	0.00350624
76.19	0.00381679
74.8	0.00200803
74.73	0.2
74.66	0.5
74.49	0.0030349
74.22	0.0215827
74.04	0.166667
73.86	0.0283688
73.39	0.00392157
73.37	0.000879894
72.31	0.0009995
72.2	0.0277778
72.11	0.0032094
72.09	0.00404858
72.09	0.0666667
71.78	0.12
71.56	0.0204082
71.26	1
71.11	0.25
70.81	0.307692
69.7	0.000302343
69.44	0.12
69.23	0.00689655
69.23	0.5
69.19	0.111111
69.05	0.0526316
69.05	0.0277778
69	0.5
68.38	0.5
68.24	0.235294
67.48	0.00044843
67.29	0.00434783
67.22	0.0526316
66.67	0.00578035
66.67	0.133333
66.56	1
66.5	0.00597015
66.29	0.25
66.2	0.166667
65.81	0.000662252
65.45	0.142857
64.8	0.1
64.36	0.00262342
63.8	0.00343643
63.73	0.0013587
63.45	0.111111
63.41	0.027027
62.7	2.94942e-05
62.64	0.00321543
62.42	0.00202429
61.86	0.00547945
60.98	0.0277778
60.44	0.0107527
60.42	0.011236
60.42	0.00434783
60.4	0.025641
60.25	0.00102987
59.73	0.027027
59.72	0.00803213
59.29	0.00913242
59.02	0.00218579
58.98	0.0833333
58.96	0.0666667
58.93	0.2
58.11	0.00133452
57.97	0.00075358
57.75	0.149425
57.7	0.0027248
57.68	0.0138889
57.6	0.00350624
57.54	0.0526316
57.4	0.00350624
57.39	0.0123457
56.72	0.00705329
56.7	0.0212766
56.23	0.0185185
56.08	0.0196078
55.66	0.142857
55.56	0.037037
55.42	0.00110375
55.13	0.0012987
55.13	0.000877963
54.55	0.25
54.55	0.00207182
54.41	0.00201207
54.29	2.60301e-05
54	8.84199e-05
53.97	0.00443881
53.89	0.00150225
53.88	0.25
53.7	0.00172117
53.54	0.0282486
53.4	0.00488599
53.15	0.0227273
53.12	0.0125
52.82	0.0034965
52.56	0.00719425
52.46	0.333333
52.42	0.0714286
52.38	0.0107527
52.36	0.0070922
52.11	0.0162338
51.85	0.0588235
51.83	0.00456621
51.66	0.125
51.6	0.0288462
51.59	0.00297619
51.43	0.0121951
51.18	0.0666667
51.13	0.0018018
50.93	0.00242131
50.86	0.00097561
50.83	0.111111
50.78	0.166667
50.74	0.03125
50.62	0.25
50.55	0.00138122
50.39	0.1
50.32	0.000673854
50.23	0.00630915
50	0.00350624
50	0.00406504
49.88	0.117647
49.69	0.000948767
49.63	0.0625
49.57	8.03955e-05
49.47	0.00079968
49.38	0.047619
49.11	0.00503778
48.95	0.5
48.95	0.00110497
48.88	0.00285307
48.85	0.00111607
48.83	0.0105263
48.68	0.00149925
48.63	0.00302954
48.57	0.00443881
47.89	0.00194175
47.84	0.000142146
47.83	0.0291262
47.73	0.111111
47.33	0.358974
47.19	0.030303
46.89	0.04
46.67	0.166667
46.38	0.00390625
46.3	1
46.29	0.00561798
46.15	0.375
46.06	0.0136986
45.96	0.030303
45.96	0.0188679
45.88	0.333333
45.86	0.00129836
45.83	0.0116279
45.8	1
45.75	0.00649351
45.62	0.00192678
45.5	0.00143954
45.47	0.0526316
45.45	0.1
45.42	0.0190476
45.39	0.00421941
45.38	0.00540541
45.32	0.0240964
45.27	0.5
45.25	0.00342466
45.18	0.0175439
45.03	0.000245942
44.9	0.0638298
44.77	0.0393013
44.62	0.0017762
44.62	0.00183486
44.57	0.333333
44.51	0.000334426
44.42	0.0272727
44.36	0.000348675
44.29	0.0014498
44.21	0.00480769
44.19	0.111111
43.98	0.0625
43.97	0.00138953
43.97	0.00571429
43.94	0.00401606
43.78	0.04
43.57	0.0353896
43.55	0.00518135
43.27	0.05
43.16	0.0625
43.14	0.1
43.12	0.5
43.1	0.00138953
43.1	0.0127389
42.5	0.5
42.47	0.147059
42.46	0.0689655
42.42	0.00680272
42.39	0.0175439
42.16	0.0031746
42.14	0.000732541
42.07	0.0181818
41.93	0.0434783
41.92	0.0123967
41.91	0.0012685
41.28	0.0070922
41.18	0.0454545
40.85	1
40.81	0.00636943
40.66	0.00473934
40.63	0.00484261
40.57	0.333333
40.56	0.0434783
40.44	0.00384615
40.41	0.0276243
40.34	0.0123457
40.34	0.00102564
40.31	0.03125
40.27	0.0330579
40.08	0.00232558
40.06	0.010101
40.06	0.00236967
39.69	0.0491935
39.63	0.00591716
39.48	0.5
39.29	0.00492611
39.29	0.0126582
39.15	0.00347222
39.12	0.125
39.11	0.0015528
39.08	0.000883392
38.98	0.00171527
38.83	0.00647948
38.78	0.000142572
38.76	0.0454545
38.75	0.0526316
38.52	0.00787402
38.47	0.00242424
38.46	0.166667
38.46	0.000351247
38.41	0.00141044
38.41	0.0112202
38.29	0.00636943
38.06	0.000271395
38.03	0.0138249
37.94	1
37.89	0.00136986
37.89	0.015625
37.88	0.000352237
37.85	0.025641
37.83	0.0011655
37.69	0.00487805
37.69	5.90214e-05
37.5	0.00142045
37.3	0.012987
37.22	0.00403226
37.21	0.000186881
37.18	0.142857
37.11	0.027027
37.1	0.00970874
37.09	0.0056338
37.07	0.000305437
37.03	0.00806452
37.02	0.0454545
37	0.0140845
36.98	0.00630915
36.98	0.181818
36.94	0.0459364
36.94	0.108108
36.89	0.00568182
36.88	0.00296736
36.79	0.00108578
36.76	8.26628e-05
36.75	0.00197628
36.73	0.00445633
36.72	0.00574713
36.36	0.142857
36.27	0.0714286
36.24	0.000104338
36.22	0.0263415
36.16	0.333333
36.02	4.03616e-05
36	0.5
36	0.111111
35.94	0.000294985
35.92	0.0285714
35.86	0.00075358
35.4	0.000262881
35.26	0.025641
35.22	0.00171527
35.07	0.000766284
35.04	0.00171527
35.02	0.0120482
35.01	0.000414594
34.97	0.015544
34.82	0.0210526
34.79	0.00160901
34.78	0.1
34.74	0.00093985
34.66	0.017094
34.63	0.030303
34.62	0.030303
34.59	0.0454545
34.54	0.000414422
34.48	0.5
34.47	0.166667
34.44	0.0227273
34.44	0.02
34.4	0.037037
34.24	0.047619
34.21	0.125
34.19	0.00492611
34.19	0.037037
34.18	0.00943396
34.12	0.00332226
34.12	0.00729927
34.09	0.000151355
34.01	0.00121655
33.98	1
33.98	1
33.94	0.166667
33.94	0.2
33.91	0.016129
33.9	0.0769231
33.83	0.00330033
33.8	0.0625
33.73	0.00107527
33.72	0.00193536
33.7	0.00877193
33.65	0.00171527
33.62	0.0169492
33.59	0.00129534
33.33	0.0138889
33.33	0.5
33.23	0.00146843
33.23	0.00251256
33.08	0.0434783
32.99	0.00178253
32.89	0.0434783
32.87	0.00763359
32.81	0.0263415
32.79	0.0285714
32.74	0.0645161
32.71	0.0096
32.65	0.0136054
32.62	0.0121951
32.61	0.0149254
32.54	0.015873
32.53	0.25
32.48	0.0588235
32.41	0.117647
32.4	0.00320513
32.31	0.0625
32.28	0.00248059
32.2	0.133333
32.13	0.25
32.11	0.013986
32.09	0.000933707
32.08	0.0681818
32.02	0.0153846
31.99	0.00487805
31.9	0.00166667
31.79	0.5
31.64	0.00625
31.62	0.000543183
31.62	0.0714286
31.5	0.0263415
31.48	0.25
31.44	0.00304878
31.32	0.0030581
31.32	0.00272727
31.16	0.00143244
31.15	0.2
31.08	0.0540541
31.06	0.0361446
30.96	0.00549451
30.95	0.00389105
30.91	0.2
30.85	0.0344828
30.83	0.0882353
30.8	0.000208594
30.77	0.222222
30.71	0.00185529
30.64	0.166667
30.63	0.011236
30.56	0.0021692
30.52	0.0263158
30.52	0.00274725
30.52	0.5
30.36	0.0012279
30.3	0.00609756
30.3	0.0151515
30.29	0.002079
30.21	0.000367647
30.2	0.0277778
30.19	0.000229148
30.19	0.000699301
30.06	0.142857
30	0.00543478
29.99	1
29.93	0.00223714
29.87	1.70876e-05
29.87	0.0833333
29.86	0.000543036
29.82	0.0740741
29.7	0.00307692
29.66	0.0697674
29.61	0.000707714
29.43	0.000463392
29.41	0.000152602
29.41	0.000212134
29.22	0.000281717
29.16	0.00178891
29.11	0.333333
29.11	0.176471
29.11	0.0588235
29.08	0.0769231
29.01	0.2
28.92	0.111111
28.92	0.0104167
28.89	0.000319795
28.88	1
28.86	0.0119048
28.84	0.00604839
28.7	0.142857
28.57	0.00689655
28.57	0.00408163
28.56	0.00247525
28.4	0.00689655
28.38	0.00430107
28.29	0.0740741
28.28	0.5
28.24	0.000319387
28.22	0.00118343
28.16	0.0428571
28.02	0.03125
27.95	0.0135135
27.92	0.0123457
27.9	0.0253165
27.82	0.00722022
27.81	0.000302343
27.8	0.000101792
27.71	0.0135135
27.59	0.0384615
27.56	0.0094162
27.45	0.0869565
27.38	0.00705882
27.32	0.00118203
27.27	0.5
27.21	0.00146735
27.18	0.000332336
27.16	0.00108932
27.11	0.008
27.03	0.0714286
26.94	0.0116959
26.91	0.0666667
26.88	0.00309597
26.79	0.1
26.79	0.000682128
26.58	0.0217391
26.48	0.004
26.48	0.166667
26.44	0.0142857
26.38	0.010101
26.38	0.00362319
26.23	0.00892857
26.18	0.00107991
26.17	0.333333
25.95	0.2
25.93	0.00531915
25.91	0.0232558
25.91	0.0190476
25.87	0.000104948
25.77	0.000720461
25.69	0.00763359
25.66	0.0012279
25.64	0.00684931
25.63	0.0857143
25.55	0.000653083
25.43	0.025641
25.43	0.162162
25.42	0.00381679
25.39	0.00122699
25.29	0.00337838
25.28	0.000481232
25.23	1
25.08	0.0123457
25.06	0.0022779
25.05	0.047619
25.02	0.0277778
25	0.00059988
25	0.000297089
25	0.75
24.96	0.0263158
24.94	0.333333
24.85	0.00434783
24.73	0.00193798
24.66	0.00804289
24.6	8.85112e-05
24.6	0.000811688
24.59	0.000202532
24.59	0.000154369
24.56	0.00549451
24.47	0.00813008
24.3	0.358974
24.23	0.000281717
24.23	0.008
23.93	0.0121951
23.9	0.5
23.85	0.2
23.84	0.0454545
23.8	0.0185185
23.67	0.0377358
23.49	1
23.47	0.00543478
23.39	0.333333
23.23	0.08
23.18	0.111111
23.06	0.00251889
23.03	0.000218866
23.02	0.1
23.01	0.0126582
23.01	0.0135135
22.82	0.000332336
22.71	0.0526316
22.67	0.000177012
22.65	0.00201207
22.58	0.0588235
22.58	0.00387597
22.57	0.00588235
22.55	0.0151515
22.5	0.5
22.48	0.00540541
22.45	0.0055325
22.32	0.142857
22.19	0.00990099
22.14	0.000650618
22.13	0.0625
22.04	0.00694444
22.02	0.2
21.99	0.06875
21.95	0.5
21.94	0.00704225
21.91	0.0113636
21.9	0.000718907
21.85	1
21.78	0.00111235
21.75	0.0113208
21.74	0.00623053
21.71	0.254902
21.7	0.000143781
21.65	0.045977
21.5	0.0106383
21.48	0.00359712
21.48	0.00253165
21.37	0.2
21.32	0.5
21.31	0.0555556
21.26	0.00125
21.23	4.58085e-05
21.15	0.05
21.13	1
21.11	0.0434783
21.05	0.0229885
21.05	0.000344947
21.05	0.2
20.97	0.000204436
20.85	0.0454545
20.78	0.000368189
20.78	0.00355114
20.67	0.0041841
20.63	0.00194175
20.55	0.046875
20.51	0.027027
20.35	0.016129
20.33	0.00104932
20.31	0.0166667
20.28	0.25
20.16	0.00549451
20	0.00203874
20	0.111111
20	0.333333
20	0.0434783
20	0.00378788
19.9	0.0307692
19.85	0.000209776
19.8	0.0222222
19.75	0.004816
19.67	0.0133333
19.65	0.2
19.58	0.00555556
19.57	0.0008726
19.56	0.04
19.54	0.103448
19.49	0.0384615
19.44	0.000905797
19.43	0.047619
19.41	0.2
19.4	0.010274
19.29	0.000716161
19.23	0.05
19.19	0.166667
19.15	0.00514139
19.11	0.025641
19.08	0.5
19.07	0.00613497
19.02	0.0097561
19	0.162162
18.94	0.00150376
18.87	0.0909091
18.86	0.00628931
18.86	0.00285714
18.84	0.0416667
18.81	0.0070922
18.75	0.0405405
18.67	0.142857
18.6	0.00358423
18.57	0.000956653
18.42	0.0384615
18.42	0.190476
18.4	0.0138889
18.36	0.001336
18.3	0.2
18.28	0.0277778
18.28	0.333333
18.23	0.00289436
18.22	0.000812348
18.17	0.00621118
18.13	0.0107527
18.1	0.0019685
18.1	0.0030303
18.09	0.333333
17.98	0.00943396
17.97	0.010989
17.88	0.0625
17.8	0.005
17.71	0.00724638
17.63	0.0262582
17.58	0.00769231
17.5	0.00425532
17.45	0.000779423
17.44	0.5
17.39	0.0526316
17.37	0.00364964
17.36	0.00806452
17.29	0.0333333
17.23	0.00343643
17.19	1
17.15	0.111111
17.15	5.31844e-05
17.1	0.0769231
17.03	0.000359583
16.99	0.00196464
16.98	0.0104712
16.92	0.25
16.9	0.012987
16.88	0.000257621
16.86	0.00413223
16.85	0.00606061
16.84	0.00632911
16.74	0.00414938
16.7	0.117647
16.67	0.111111
16.67	0.0222222
16.63	0.00255102
16.6	0.125
16.53	0.05
16.39	0.0163934
16.37	0.0046729
16.33	0.00977995
16.33	0.00512821
16.13	0.000682128
16.09	0.333333
16.05	0.0526316
15.93	0.000816327
15.93	0.00156495
15.91	0.0116279
15.88	0.000667111
15.87	0.111111
15.84	0.117647
15.82	1
15.81	0.015625
15.79	0.0555556
15.73	0.000117813
15.73	0.0150376
15.64	0.0625
15.55	1
15.54	0.0155844
15.49	1
15.47	0.018018
15.44	0.5
15.42	0.3
15.3	0.0144928
15.28	0.000345155
15.24	0.00684931
15.23	0.00037092
15.22	0.333333
15.13	0.00392157
15.11	0.0583333
15.07	0.2
14.94	0.000437254
14.77	1
14.75	0.0384615
14.71	0.000191644
14.68	0.222222
14.66	7.44325e-05
14.61	0.25
14.58	0.0143369
14.56	0.0204082
14.5	0.00158479
14.47	0.00107527
14.44	0.00243902
14.43	0.00448431
14.43	0.00170068
14.35	0.00990099
14.32	0.00179533
14.31	0.00847458
14.29	4.65614e-05
14.29	0.0357143
14.2	0.111111
14.1	0.0583333
14.04	0.666667
14	0.000201491
13.97	0.166667
13.93	0.03125
13.91	0.000201315
13.9	0.117647
13.8	0.00729927
13.78	0.0666667
13.77	6.7792e-05
13.73	0.0188679
13.64	0.000902527
13.62	0.142857
13.56	0.000151665
13.52	0.000377893
13.51	0.000228311
13.4	0.0277778
13.31	0.00684931
13.31	0.235294
13.24	0.125
13.23	0.000304229
13.19	0.0153846
13.19	0.00787402
13.16	0.00295858
13.15	0.0208333
13.07	0.000582411
13.04	0.00302115
13.03	0.000685166
12.97	8.97022e-05
12.97	0.025641
12.95	0.333333
12.86	0.0180723
12.85	0.111111
12.79	0.00371747
12.73	0.0078125
12.66	0.000570288
12.61	0.166667
12.61	0.00568182
12.58	0.000296209
12.5	0.047619
12.46	0.16
12.44	0.000970874
12.41	0.00114613
12.36	0.0151515
12.32	0.0147059
12.3	0.025641
12.27	0.0434783
12.27	0.00187266
12.25	0.333333
12.23	0.00282486
12.12	0.005
12.1	0.000557724
12.02	0.666667
11.94	0.0119048
11.93	0.00956938
11.93	0.0128205
11.89	0.00873362
11.82	2.34935e-05
11.73	0.00990099
11.68	0.00181488
11.63	0.25
11.58	0.000232992
11.55	0.037037
11.5	0.00943396
11.5	0.000206398
11.49	0.000176056
11.45	1
11.43	0.019685
11.43	0.00184162
11.41	0.000688231
11.41	0.00813008
11.41	0.00112613
11.41	0.0142857
11.41	0.00714286
11.34	0.0666667
11.3	0.0060241
11.26	0.0204082
11.24	0.0243902
11.2	0.125
11.19	0.1
11.18	0.00448431
11.11	0.00045977
11.11	0.000256279
11.04	0.000777605
11.03	0.000815661
11.01	0.0204082
10.95	0.0010142
10.92	0.039604
10.9	0.00326264
10.86	5.84966e-05
10.85	0.0232558
10.82	0.0147059
10.81	0.142857
10.8	0.00103413
10.79	0.0285714
10.73	0.000297089
10.72	0.25
10.69	0.00629921
10.68	0.25
10.6	0.00653595
10.58	0.333333
10.51	0.0405405
10.4	0.00833333
10.4	0.25
10.34	0.00390625
10.31	0.0111111
10.29	0.00403226
10.29	0.166667
10.23	0.375
10.14	0.1
10.12	0.000853971
10.11	0.0181818
10.09	0.00208225
10.09	0.005
10	0.0588235
9.98	0.4
9.98	0.0217391
9.96	0.00512821
9.92	0.25
9.91	0.00862069
9.88	0.0169492
9.87	0.00120627
9.84	0.00628931
9.79	0.0263158
9.76	7.83607e-05
9.76	0.000243191
9.68	0.000477555
9.67	0.00236407
9.64	0.00152672
9.62	0.00107411
9.6	0.00476191
9.6	0.0114286
9.58	1
9.57	0.00854701
9.57	0.111111
9.54	0.0018018
9.49	0.333333
9.49	0.00146843
9.48	0.00184332
9.34	0.0769231
9.31	0.166667
9.26	0.0142857
9.21	0.000451671
9.13	0.00100908
9.09	0.000200763
9.07	0.0384615
9.01	0.1
8.96	0.0344828
8.89	2.09503e-05
8.84	0.0380952
8.84	0.00114679
8.82	0.0202703
8.74	1
8.74	0.00206612
8.73	0.012987
8.68	0.0833333
8.65	0.222222
8.63	0.00185874
8.61	0.00316122
8.6	0.000222469
8.54	0.00266667
8.53	0.0454545
8.52	6.09199e-05
8.51	0.00462963
8.51	6.63438e-05
8.5	0.00877193
8.44	0.000317561
8.37	0.00884956
8.35	0.0106383
8.33	0.272727
8.31	0.0434783
8.28	0.0833333
8.19	0.000155183
8.19	0.25
8.17	0.0666667
8.1	0.0014881
8.09	0.166667
8.04	0.0512821
8.04	0.2
7.95	0.0666667
7.93	0.0344828
7.91	0.125
7.87	0.00560103
7.85	0.0454545
7.76	0.00130208
7.69	0.1
7.69	0.0294118
7.68	0.00291545
7.65	0.2
7.65	0.0023753
7.64	0.0140845
7.57	0.0333333
7.48	0.0175439
7.4	0.00407332
7.37	1
7.35	0.0087146
7.33	0.0869565
7.25	0.00547945
7.23	0.000486618
7.22	0.0322581
7.19	0.05
7.14	0.000163372
7.09	0.25
7.07	0.00346021
7	0.0186916
6.99	0.004329
6.94	0.00234192
6.94	0.0253165
6.92	0.000129291
6.82	0.0169492
6.77	0.00318471
6.74	0.00556173
6.73	0.00421941
6.73	0.25
6.72	0.0116279
6.72	9.78665e-05
6.56	0.0526316
6.55	0.00268096
6.51	0.142857
6.49	0.00952381
6.47	0.00346021
6.47	0.166667
6.44	9.00495e-05
6.35	0.000433463
6.22	0.000183857
6.22	0.00121433
6.21	0.0155039
6.2	0.0392157
6.11	1
6.11	0.000445633
6.07	9.16506e-05
6.04	0.00273973
5.96	0.00819672
5.85	0.00375234
5.75	0.0149254
5.75	0.00114155
5.72	0.0384615
5.71	7.43384e-05
5.7	0.0052356
5.7	0.025641
5.7	0.00136986
5.61	0.222222
5.59	0.000297265
5.56	0.000117454
5.55	0.111111
5.48	0.00225225
5.37	0.0151515
5.36	0.0015674
5.35	0.00653595
5.33	0.000642261
5.21	0.000221239
5.18	0.0104167
5.17	0.5
5	0.00020829
4.98	0.0526316
4.96	0.000862813
4.94	0.00561798
4.93	0.000263922
4.89	0.0273973
4.88	0.5
4.88	0.000201613
4.87	0.0377358
4.85	0.000148456
4.84	0.0107527
4.83	0.00102775
4.81	0.0350877
4.8	0.025641
4.8	0.00858369
4.79	0.000731707
4.66	0.04
4.65	0.000400962
4.64	0.03125
4.57	0.0120482
4.47	0.00869565
4.41	0.00165289
4.37	0.00321543
4.33	0.00465116
4.29	0.0434783
4.23	0.00232558
4.15	0.00909091
4.04	0.00162075
3.92	0.0322581
3.85	0.666667
3.85	0.00258398
3.85	0.0666667
3.83	0.00490196
3.77	0.0322581
3.7	0.00198216
3.69	0.125
3.63	0.0909091
3.55	0.00194175
3.55	0.001443
3.42	0.0333333
3.38	0.0192308
3.32	0.0119225
3.29	0.0119225
3.29	0.00320513
3.29	0.00092707
3.26	0.125
2.96	0.000291588
2.96	0.000691563
2.96	0.000361272
2.92	0.0070922
2.84	0.00026448
2.82	0.0322581
2.75	0.333333
2.62	4.45097e-05
2.58	0.00757576
2.55	0.00344828
2.39	0.00265957
2.36	0.00217865
2.28	0.0769231
2.26	0.0169492
2.24	0.037037
1.89	0.00109569
1.83	0.00564972
1.82	0.25
1.75	0.01
1.67	0.333333
1.36	7.96813e-05
1.22	0.000322945
0.73	0.263158
0.68	0.000467727
0.65	0.00103253
0.65	0.0588235
0.6	0.00330033
0.18	0.000109493
0	0.125

## Sheet: byYear
year	num all PMIDs	num idp PMIDs	fract idp PMIDs
1978	7366	2	0.000271518
1979	8033	0	0
1980	9120	1	0.000109649
1981	9414	3	0.000318674
1982	10747	1	9.30492e-05
1983	11969	2	0.000167098
1984	12916	4	0.000309693
1985	14059	4	0.000284515
1986	15092	2	0.000132521
1987	16393	5	0.000305008
1988	18182	3	0.000164998
1989	20943	6	0.000286492
1990	22945	15	0.000653737
1991	24957	7	0.000280482
1992	26636	12	0.000450518
1993	28462	14	0.000491884
1994	31040	15	0.000483247
1995	33784	24	0.000710395
1996	36070	36	0.000998059
1997	38096	48	0.00125997
1998	40604	43	0.00105901
1999	43054	45	0.0010452
2000	45329	45	0.000992742
2001	47127	70	0.00148535
2002	48853	60	0.00122817
2003	50930	84	0.00164932
2004	54803	107	0.00195245
2005	56030	124	0.0022131
2006	58203	97	0.00166658
2007	59965	89	0.0014842
2008	62498	142	0.00227207
2009	64534	152	0.00235535
2010	68210	177	0.00259493
2011	71342	184	0.00257913
2012	76649	224	0.00292241
2013	81297	218	0.00268153
2014	74045	200	0.00270106
	1399697	2265

## Sheet: byYearHC
year	num all PMIDs	num idp PMIDs	fract idp PMIDs
1978	1036	0	0
1979	1055	0	0
1980	1268	0	0
1981	1296	2	0.00154321
1982	1544	0	0
1983	1781	0	0
1984	1867	0	0
1985	2061	1	0.000485201
1986	2212	0	0
1987	2404	0	0
1988	2559	0	0
1989	3107	0	0
1990	3466	3	0.000865551
1991	3663	1	0.000273
1992	3953	1	0.000252972
1993	4263	1	0.000234577
1994	4925	0	0
1995	5735	4	0.000697472
1996	6361	9	0.00141487
1997	6922	6	0.000866802
1998	8135	6	0.000737554
1999	8593	4	0.000465495
2000	8072	10	0.00123885
2001	8591	19	0.00221162
2002	8923	21	0.00235347
2003	9217	28	0.00303786
2004	9692	19	0.00196038
2005	10062	35	0.00347843
2006	10497	28	0.00266743
2007	10682	38	0.00355739
2008	11120	61	0.00548561
2009	11775	51	0.00433121
2010	12649	70	0.00553403
2011	13140	69	0.00525114
2012	14315	116	0.00810339
2013	15098	73	0.00483508
2014	13743	77	0.00560285

## Sheet: terms
This searches all IDP associated abstracts and gives you the total occurance of keywords over all years
search term	number of occurances in abstracts
naturally flexible	0
intrinsically disordered	999
naturally unstructured	2
natively unstructured	36
inherently flexible	7
intrinsically unfolded	31
intrinsically flexible	7
naturally unfolded	12
inherently denatured	0
natively denatured	0
intrinsically unstructured	220
natively disordered	60
inherently unfolded	0
inherently disordered	8
intrinsically denatured	1
naturally denatured	0
inherently unstructured	3
natively flexible	0
natively unfolded	273
naturally disordered	6

## Sheet: termsYear
natively disordered	number of occurances			intrinsically disordered	number of occurances			natively unfolded	number of occurances			intrinsically unstructured	number of occurances
1978	0			1978	0			1978	0			1978	0
1979	0			1979	0			1979	0			1979	0
1980	0			1980	0			1980	0			1980	0
1981	0			1981	0			1981	0			1981	0
1982	0			1982	0			1982	0			1982	0
1983	0			1983	0			1983	0			1983	0
1984	0			1984	0			1984	0			1984	0
1985	0			1985	0			1985	0			1985	0
1986	0			1986	0			1986	0			1986	0
1987	0			1987	0			1987	0			1987	0
1988	0			1988	0			1988	0			1988	0
1989	0			1989	0			1989	0			1989	0
1990	0			1990	0			1990	0			1990	0
1991	0			1991	0			1991	0			1991	0
1992	0			1992	0			1992	0			1992	0
1993	0			1993	0			1993	0			1993	0
1994	0			1994	0			1994	0			1994	0
1995	0			1995	0			1995	0			1995	0
1996	0			1996	0			1996	1			1996	0
1997	0			1997	0			1997	2			1997	0
1998	0			1998	0			1998	0			1998	0
1999	0			1999	0			1999	5			1999	0
2000	0			2000	1			2000	6			2000	1
2001	2			2001	4			2001	12			2001	3
2002	0			2002	7			2002	14			2002	0
2003	1			2003	10			2003	17			2003	13
2004	1			2004	2			2004	20			2004	6
2005	4			2005	15			2005	24			2005	18
2006	8			2006	33			2006	19			2006	16
2007	10			2007	34			2007	23			2007	14
2008	6			2008	71			2008	35			2008	36
2009	3			2009	67			2009	23			2009	29
2010	3			2010	98			2010	23			2010	23
2011	9			2011	139			2011	17			2011	12
2012	3			2012	175			2012	15			2012	19
2013	2			2013	181			2013	7			2013	16
2014	7			2014	153			2014	10			2014	14

## Sheet: journals
Journal	Number of Occurrences
J Biol Chem	256
Biochemistry	239
J Mol Biol	171
Proc Natl Acad Sci U S A	108
PLoS One	75
Protein Sci	65
J Am Chem Soc	51
Biophys J	51
Biochim Biophys Acta	50
Proteins	47
Structure	45
FEBS Lett	44
Biochem Biophys Res Commun	39
Nature	39
Nucleic Acids Res	27
Science	26
EMBO J	25
Nat Struct Biol	23
FEBS J	23
J Phys Chem B	23
Mol Cell	21
Mol Biosyst	21
J Virol	19
Biomol NMR Assign	17
Cell	17
Protein Expr Purif	15
Arch Biochem Biophys	15
Biopolymers	14
PLoS Comput Biol	14
Mol Cell Biol	14
Protein Pept Lett	13
Acta Crystallogr D Biol Crystallogr	13
Biochem J	13
J Struct Biol	12
Eur J Biochem	12
Nat Struct Mol Biol	11
Plant Physiol	11
J Biomol NMR	11
Mol Microbiol	10
Biochem Soc Trans	9
Biophys Chem	9
J Proteome Res	9
Chembiochem	9
J Biomol Struct Dyn	8
Sci Rep	8
Adv Exp Med Biol	8
Curr Protein Pept Sci	7
FASEB J	7
Cell Cycle	6
Biochimie	6
Cell Mol Life Sci	6
J Biochem	6
Phys Chem Chem Phys	6
Genes Dev	6
Int J Mol Sci	6
Biomacromolecules	5
J Bacteriol	5
Eur Biophys J	5
RNA	5
J Am Soc Mass Spectrom	5
Gene	5
J Cell Sci	5
Virology	5
Int J Biol Macromol	4
Mol Biol Cell	4
Mol Cell Endocrinol	4
Biol Chem	4
Methods Mol Biol	4
Photosynth Res	4
PLoS Pathog	4
J Neurochem	4
Neurodegener Dis	4
J Agric Food Chem	4
Anal Chem	4
J Mol Recognit	4
ACS Chem Neurosci	4
J Cell Biol	4
Amino Acids	4
Protein Eng Des Sel	4
Biochem Cell Biol	4
J Gen Virol	4
J Neurosci Res	4
Angew Chem Int Ed Engl	4
Langmuir	4
J Chem Phys	3
Semin Cell Dev Biol	3
J Biol Inorg Chem	3
Acc Chem Res	3
Nat Chem Biol	3
J Inorg Biochem	3
Chem Commun (Camb)	3
PLoS Biol	3
J Magn Reson	3
Int Rev Cell Mol Biol	3
Mol Biochem Parasitol	3
Methods Enzymol	3
Ann N Y Acad Sci	3
Curr Opin Struct Biol	3
ACS Chem Biol	3
J Pept Sci	3
Curr Biol	2
Plant Mol Biol	2
J Alzheimers Dis	2
Plant Cell Rep	2
IUBMB Life	2
Anal Biochem	2
BMC Res Notes	2
Pac Symp Biocomput	2
Infect Disord Drug Targets	2
Circ Res	2
Chem Biol	2
Protein Eng	2
J Mol Graph Model	2
Eur J Cell Biol	2
Trends Biochem Sci	2
Anal Bioanal Chem	2
J Oral Biosci	2
Biomolecules	2
Plant Cell	2
Nat Protoc	2
Curr Alzheimer Res	2
Prion	2
DNA Repair (Amst)	2
Biosci Rep	2
Plant Signal Behav	2
J Neurosci	2
Eur J Oral Sci	2
Cell Death Differ	2
Brain Res	2
Trends Mol Med	2
Mol Endocrinol	2
BMC Biochem	2
Front Biosci (Landmark Ed)	2
Phys Rev Lett	2
J Photochem Photobiol B	2
Mol Cell Proteomics	2
Bioinformatics	2
J Mol Model	2
Genes Cells	2
BMC Neurosci	2
Autophagy	2
RNA Biol	2
J Phys Chem Lett	2
Cancer Res	2
Neuron	2
Korean J Parasitol	2
DNA Cell Biol	2
Colloids Surf B Biointerfaces	2
Nat Commun	2
Acta Crystallogr Sect F Struct Biol Cryst Commun	2
BMC Struct Biol	2
Hum Mol Genet	2
Chemphyschem	2
BMB Rep	2
Elife	2
Eukaryot Cell	2
Virus Res	2
Int J Pept Protein Res	2
Oncogene	1
J Nat Prod	1
Microbiology	1
Neurobiol Dis	1
EMBO Rep	1
Genome	1
Genetics	1
AMIA Jt Summits Transl Sci Proc	1
Cytoskeleton (Hoboken)	1
Bratisl Lek Listy	1
Int J Mass Spectrom	1
Biol Cell	1
CNS Neurol Disord Drug Targets	1
Dev Cell	1
Cell Physiol Biochem	1
BMC Biol	1
Infect Immun	1
Braz J Microbiol	1
BMC Genomics	1
J Vis Exp	1
Analyst	1
Blood	1
Mov Disord	1
Infect Genet Evol	1
Can J Biochem Cell Biol	1
Genome Biol	1
Peptides	1
Wiley Interdiscip Rev RNA	1
J Immunol	1
Bone	1
Glycobiology	1
J Urol	1
Mol Genet Genomics	1
Epigenetics	1
Methods	1
Cell Host Microbe	1
Traffic	1
J Chem Theory Comput	1
Bioarchitecture	1
Cancer Sci	1
Presse Med	1
J Surg Res	1
Annu Rev Biochem	1
Cell Commun Signal	1
J Med Chem	1
J Plant Res	1
Appl Math Comput	1
Front Plant Sci	1
Appl Environ Microbiol	1
Mol Neurobiol	1
Gematol Transfuziol	1
Prog Neurobiol	1
Tuberculosis (Edinb)	1
J Exp Bot	1
Aging (Albany NY)	1
Front Genet	1
Parkinsonism Relat Disord	1
Comput Struct Biotechnol J	1
Dev Biol	1
Biometals	1
Adv Protein Chem	1
Bioessays	1
Self Nonself	1
Plant J	1
Drug Discov Today	1
J Cell Physiol	1
Virol J	1
J Steroid Biochem Mol Biol	1
Cell Calcium	1
Cryobiology	1
Macromol Biosci	1
Curr Top Microbiol Immunol	1
Cold Spring Harb Perspect Med	1
J Neurol Sci	1
Dev Dyn	1
Curr Opin Chem Biol	1
Planta	1
Biomaterials	1
Oncotarget	1
Acta Crystallogr B	1
Mol Biol (Mosk)	1
Int J Biochem Cell Biol	1
Cell Commun Adhes	1
J Hum Genet	1
Biol Direct	1
J Biosci	1
Comp Biochem Physiol B Biochem Mol Biol	1
Eur J Med Chem	1
Bioorg Med Chem Lett	1
Cell Mol Neurobiol	1
Ai Zheng	1
Nucl Recept Signal	1
Theor Appl Genet	1
Micron	1
Neuropeptides	1
Alzheimer Dis Assoc Disord	1
Phys Biol	1
Brain Res Mol Brain Res	1
Immunity	1
Cell Rep	1
Cold Spring Harb Perspect Biol	1
Int J Cancer	1
J Pept Res	1
Neuroscience	1
Neuropathology	1
Prostate	1
J Clin Invest	1
Cell Mol Immunol	1
Front Microbiol	1
Int J Parasitol	1
J Fluoresc	1
Biosci Biotechnol Biochem	1
In Silico Biol	1
Acta Crystallogr F Struct Biol Commun	1
Genes Cancer	1
J Microbiol Biotechnol	1
Nat Methods	1
Rambam Maimonides Med J	1
Neurochem Res	1
Nat Med	1
Brain Pathol	1
Plant Cell Physiol	1
BMC Evol Biol	1
J Bioenerg Biomembr	1
Talanta	1
Photochem Photobiol	1
Intrinsically Disord Proteins	1
Mol Biotechnol	1
Transfusion	1
BMC Biotechnol	1
Ann Chir Plast Esthet	1
Clin Cancer Res	1
Curr Microbiol	1
Arch Oral Biol	1
Mol Cancer	1
J Bone Miner Res	1
Arabidopsis Book	1
J Recept Signal Transduct Res	1
Acta Biochim Biophys Sin (Shanghai)	1
Mol Cells	1
ACS Nano	1
BMC Plant Biol	1
Curr Phys Chem	1
Microbes Infect	1
Spectrochim Acta A Mol Biomol Spectrosc	1
J Phys Chem A	1
Matrix Biol	1
Biotechnol Prog	1
Yakugaku Zasshi	1
Clin Exp Pharmacol Physiol	1
Chemistry	1
Int Arch Allergy Immunol	1
Annu Rev Microbiol	1
Front Physiol	1
Virus Genes	1
J Clin Endocrinol Metab	1
Biol Reprod	1
Arch Virol	1
Metallomics	1
J Synchrotron Radiat	1
Vet Parasitol	1
J Biomed Sci	1
Biomark Res	1
Mar Biotechnol (NY)	1
Immunobiology	1
Worm	1
Biotechnol J	1
Neurotoxicology	1
Phys Rev E Stat Nonlin Soft Matter Phys	1
Nat Immunol	1
Biomed Chromatogr	1
J Virol Methods	1
J Biosci Bioeng	1
J Muscle Res Cell Motil	1

## Sheet: keywords
Keyword	Number of Occurrences
Entries with no Keywords	2110
intrinsically disordered protein	35
intrinsically disordered proteins	32
alpha-synuclein	10
protein folding	9
protein structure	9
idp	9
circular dichroism	8
nmr	8
protein-protein interactions	7
molecular dynamics	6
phosphorylation	6
nuclear magnetic resonance	6
parkinson's disease	6
isothermal titration calorimetry	5
protein dynamics	5
intrinsic disorder	4
amelogenin	4
intrinsically disordered	4
nmr spectroscopy	4
hydrodynamic radius	4
sec	4
calmodulin	4
synuclein	4
kinetics	4
apoptosis	3
rdc	3
intrinsically disordered region	3
intrinsically unstructured protein	3
gene regulation	3
chromatin	3
toxoplasma gondii	3
enamel	3
bcl-2	3
allostery	3
dna replication	3
residual dipolar coupling	3
cd	3
crystal structure	3
dynamic light scattering	3
post-translational modification	3
autophagy	3
edta	3
myelin basic protein	3
analytical ultracentrifugation	3
protein-protein interaction	3
intrinsically-disordered protein	3
protein interactions	2
hsqc	2
yeast	2
helix-loop-helix	2
dna repair	2
protein aggregation	2
chaperone binding domain	2
golli-interacting protein	2
viral replication	2
oligomerization	2
dna-binding domain	2
conformational selection	2
mutagenesis	2
electron microscopy	2
nuclear receptor	2
biomineralization	2
pbs	2
proteins	2
ligand binding	2
nanopore analysis	2
ethylenediaminetetraacetic acid	2
abeta	2
size exclusion chromatography	2
small c-terminal domain phosphatase	2
coupled folding and binding	2
alzheimer's disease	2
fuzzy complex	2
er-associated degradation	2
extracellular matrix	2
molecular dynamics simulations	2
dbd	2
x-ray crystallography	2
chaperone	2
paramagnetic relaxation enhancement	2
dls	2
noesy	2
bh3-only	2
diffusion anisotropy	2
cancer	2
prostate cancer	2
molecular chaperone	2
protein self-assembly	2
bacterial pathogenesis	2
parkinson disease	2
calcium	2
intrinsically disordered domains	2
surface plasmon resonance	2
ecdysone receptor	2
intrinsically unstructured domain	2
mass spectrometry	2
polyglutamine	2
golli (gene in the oligodendrocyte lineage)	2
type three secretion system	2
oligodendrocyte	2
coiled-coil	2
sds	2
small angle x-ray scattering	2
electrostatic interactions	2
vacuole	2
heteronuclear single quantum coherence	2
protein interaction	2
rotary catalysis	1
fancni anemia	1
two-dimensional	1
lysosome	1
benign prostatic hyperplasia	1
c-src	1
protein data bank	1
tnf receptor associated factor 6	1
molecular mechanics	1
electrophysiology	1
single particle reconstruction	1
zinc	1
morphology	1
ion channels	1
fg-nucleoporin	1
nuclear phosphatases	1
ph dependence	1
biomolecular nmr	1
molecular motors	1
hiv-1 p24 capsid protein	1
dilated cardiomyopathy	1
lipid vesicles	1
serodiagnosis	1
serine phosphorylation	1
wild-type cathepsin f	1
non-structural protein 5a	1
karplus curve	1
phi-value analysis	1
extremophiles	1
langmuir monolayers	1
linker dna	1
protein-membrane interaction	1
glfg	1
x-ray crystal structure	1
1-anilinonaphthalene-8-sulfonate	1
single likelihood ancestor counting	1
salmonella outer protein b	1
dimerization inhibitor	1
progesterone	1
wasp homology 2 domain	1
e. coli	1
liposomes	1
cholesterol-independent regulation	1
cholesterol	1
type vii collagen	1
prolyl isomerization	1
dimer	1
scale-free network	1
tcep.hcl	1
disordered	1
periodicity	1
nei-gojobori	1
antigen	1
enthalpy-entropy compensation	1
plant-microbe interaction	1
assembly	1
dynamics	1
par-4	1
caspase activation	1
bacteria	1
duffy binding protein	1
gfp-fusion technique	1
alphasn	1
sefir	1
caffeine	1
sodium dodecyl sulfate poly-acrylamide gel electrophoresis	1
ligand-binding domain	1
pin	1
mdm2	1
hmmm	1
mdm4	1
bag6/bat3/scythe	1
ikappab kinase i	1
residual dipolar couplings	1
iran	1
ms	1
surface plasmon resonance (spr)	1
transmembrane proteoglycans	1
auc	1
polyproline type ii structure	1
mev	1
trp channel	1
hdmx	1
protein structure and folding	1
gli	1
phosphatidylcholine	1
fibrillization	1
nrd1	1
interaction networks	1
prostate associated gene 4	1
free-energy landscape	1
dna methylation	1
insensitive nuclei enhanced by polarization transfer	1
membrane interaction	1
antigen recognition	1
cross-linking domain	1
serca	1
flexible binding	1
toxicity	1
compact myelin	1
non-vesicular lipid transport	1
metalloproteins	1
gdmcl	1
gra3	1
cytokinetic ring	1
population genetics	1
nuclear factor-kappa b	1
biomembrane adhesion	1
wild type	1
segmental order parameter	1
prestin	1
a-kinase anchoring protein (akap)	1
myoglobin	1
chc	1
auto-inhibition	1
maf transcription factor	1
fel	1
staphylococcus aureus	1
esym	1
wnt/beta-catenin	1
usp	1
membrane biophysics	1
andes virus	1
rapid diagnostic test	1
vip1	1
vpx	1
small subunit	1
lipoprotein	1
flexible recognition	1
ppgpp	1
short-range noe	1
e3 ubiquitin ligase	1
gap junctions	1
stalled replication fork	1
mixed effects model of evolution	1
mals	1
structural divergence	1
mw	1
pre-steady-state kinetics	1
cam	1
yeast genetics	1
camp-dependent kinase (pka)	1
phylogenetic tree	1
polyproline	1
idr	1
cp12	1
id proteins	1
hedgehog signalling regulation	1
cyclin-dependent kinase	1
aging	1
protein degradation	1
sip	1
myelination	1
descriptive random mutagenesis	1
weak alignment	1
cancer/testis antigen	1
histone	1
phosphatidylinositol phosphate	1
intrinsically unstructured (disordered) protein	1
dipolar recoupling on-axis with scaling and shape preservation	1
molecular recognition features	1
pins	1
binding site	1
native-like aggregation	1
vaterite	1
library of disordered patterns	1
aragonite-associated protein	1
mas	1
monoclonal antibody	1
afm	1
sedimentation velocity	1
membrane folding	1
binding mechanism	1
synucleopathies	1
taz2	1
tris(2-carboxyethyl)phosphine hydrochloride	1
r14 deletion	1
bioinformatics	1
acylphosphatase	1
ired	1
trypsin	1
milk protein	1
separated local-field	1
aggresome	1
single-molecule forster resonance energy transfer	1
sv	1
purification	1
centriole	1
sapk/jnk	1
drug-discovery	1
intrinsically unstructured proteins	1
gp78	1
transcription elongation	1
se	1
natively unfolded protein	1
competitive coevolution	1
nf-kappab	1
fluorescence correlation spectroscopy	1
phospholamban	1
super elongation complex	1
itc	1
stability	1
amyloid beta	1
hmgb protein	1
encounter complex	1
iptg	1
transcription factor regulation	1
chaperonin	1
helical structures	1
delta(146)catf	1
familial alzheimer's disease	1
measles virus	1
rna splicing	1
binding-induced folding	1
peripheral membrane protein	1
aggregation-prone	1
dross	1
cell matrix	1
fad	1
il17r	1
single molecule fret	1
pcc	1
dmso	1
archaea	1
smtnl1	1
hydrogen deuterium exchange mass	1
p protein	1
b-cell-activating factor receptor	1
rna virus	1
framework	1
ribosome biogenesis	1
calmodulin-binding domain	1
endoplasmic reticulum(er)	1
horseradish peroxidase	1
delta(125)catf	1
acidic regulatory domain	1
protein crystallography	1
signal transduction	1
idps	1
hek293	1
phenylalanine-glycine repeat	1
isothermal titration calorimetry (itc)	1
structural characterizations	1
homogeneous	1
rna-protein complex	1
nicotine	1
natively unstructured proteins	1
leucine zipper	1
protein complementation assay	1
15n relaxation	1
slc26 family	1
stringent response	1
membrane proteins	1
molecular biophysics	1
human embryonic kidney 293 cells	1
network	1
crl4cdt2 ubiquitin ligase	1
dsp	1
single stranded dna binding protein	1
histone-fold	1
adhesion	1
virulence factors	1
calcite	1
magic-angle spinning	1
small rna-mediated gene silencing	1
af1 domain as a molecular rheostat	1
disordered monomer	1
intrinsically unstructured protein (iup)	1
zinc finger	1
time-resolved fluorescence anisotropy	1
structural plasticity	1
membrane reconstitution	1
leukemia	1
beta-strand	1
membrane tethering	1
oncogenesis	1
ecr	1
biophysics	1
aedes aegypti	1
macromolecular assembly	1
fret	1
alphas	1
thioflavin t	1
interaction	1
retrotranslocation	1
amyloid	1
reaction mechanism	1
sedimentation equilibrium	1
unfolded protein	1
rna polymerase ii	1
partner recognition	1
agrobacterium	1
hsp60	1
microtubule-associated protein	1
anchor residue	1
stim1	1
guanidinium chloride	1
structural transitions	1
prion-like behavior	1
steroid hormone receptor	1
magnetic tweezer	1
wild-type alpha-synuclein	1
proline rich domain	1
truncated form of human cathepsin f (ala(20)-asp(484))	1
a4f	1
pupylation	1
n-terminal acetylation	1
trosy	1
enzyme specificity	1
cathepsin f	1
cs-rosetta	1
regulation	1
atg13	1
disordered region	1
genome stability	1
atg14	1
ikki	1
small ubiquitin-like modifier	1
meme	1
shell	1
fluorescence resonance energy transfer (fret)	1
solvent perturbation	1
hub	1
single molecule biophysics	1
solid phase peptide synthesis	1
rin4	1
stress	1
human respiratory syncytial virus	1
protein domain	1
p53	1
membrane protein assembly	1
calcium-induced polymerization	1
helical stability	1
natural target cells	1
plasmodium vivax	1
intrinsically disordered peptide	1
electrospray ionization mass spectrometry	1
liquid crystal	1
bacterial virulence	1
photosynthesis	1
tag-free	1
pre	1
supramolecular machine	1
membranes	1
fluorescence resonance energy transfer	1
linker	1
chlamys farreri	1
prk	1
20e	1
mycobacteria	1
(3)j(hnha) couplings	1
lipid raft	1
isotropic reorientational eigenmode dynamics	1
page4	1
fast unconstrained bayesian approximation	1
nucleosome	1
triple resonance	1
protein kinase c	1
protein complexes	1
rna helicase	1
bivalency	1
elisa	1
cooperative assembly	1
wtcatf	1
pearson correlation coefficient	1
proline	1
md simulations	1
molecular recognition element	1
ssb interacting protein	1
protein expression and purification	1
rxr	1
central hydrophobic cluster	1
cell cycle	1
entamoeba histolytica	1
inhibitory path	1
truncated form of human cathepsin f (met(147)-asp(484))	1
coiled coil	1
nucleic acid binding	1
igg avidity	1
calcium signal	1
ecdysteroid receptor	1
isopropyl 1-thio-beta-d-galactopyranoside	1
camp	1
m	1
sequence characterizations	1
intrinsic fluorescence quenching	1
natural selection	1
coarse-grained simulation	1
horma	1
popc	1
rela/spot	1
protective polymorphisms	1
random coils	1
sivmac	1
membrane fusion	1
cancer model	1
whole-vacuole patch clamp recording	1
wt-alphas	1
binding promiscuity	1
pe	1
brush polymer	1
gra2	1
folia	1
hrp	1
stopped flow	1
retinoid x receptor	1
actin	1
cancer metastasis	1
mammalian traf3ip2	1
disordered protein region	1
biogenesis	1
proliferative inflammatory atrophy	1
conformational landscape	1
proteasome	1
retinitis pigmentosa	1
multiple myeloma	1
toll/interleukin 1 receptor	1
ssb	1
stard10	1
synapse	1
rna interference	1
selectivity in controlling gene expression	1
adaptive evolution	1
qy	1
nuclear magnetic resonance (nmr)	1
sequence analysis	1
molecular simulation	1
e7 oncoprotein	1
c-jun	1
structural evolution	1
pvp	1
alanine	1
protein kinase c (pkc)	1
dopamine	1
electrostatic	1
split-gfp reassembly	1
r(h)	1
solid-state nmr	1
mycobacterium tuberculosis	1
iq-motif	1
multiscale simulation	1
fuzz complex	1
hepatitis c virus (hcv)	1
n-terminal transcription activation domain af1	1
retinoic acid receptor	1
4e-bp1 protein	1
protein meta-structure	1
mass spectrometry (ms)	1
magnesium	1
limited proteolysis	1
sds-page	1
phosphate buffered saline	1
neurodegenerative disease	1
disordered regions	1
camp signaling	1
hiv-2	1
wt	1
delta(19)catf	1
pup-proteasome pathway	1
escherichia coli	1
snare proteins	1
p130cas	1
hybrid structure-based model	1
egg yolk sphingomyelin	1
hantavirus	1
fixed effects likelihood	1
expression	1
pdb	1
hsp90	1
cc	1
butyrylcholinesterase	1
induced fit	1
cell membrane	1
protein purification	1
sirtuins	1
molecular recognition features (morfs)	1
helix-coil	1
a(max) and ec(50)	1
sodium dodecyl sulfate	1
seeding	1
ad	1
rop6	1
progesterone receptor	1
membrane bilayer	1
interleukin 17 receptor	1
rop2	1
n-terminal domain	1
pc	1
disordered motifs	1
bh3 domain	1
pd	1
in-cell nmr	1
dithio-bis-(succinimidylpropionate)	1
free-energy surface	1
single-stranded dna	1
cellular nucleic acid binding protein	1
eh domain	1
steroid receptors	1
small vcp-interacting protein	1
enzyme regulation	1
organelle biogenesis	1
protein misfolding	1
kininogen	1
folding	1
site-directed spin labeling	1
viral protein	1
sumoylation	1
post translational modification	1
pca	1
spliceosome catalytic activation	1
metal affinity	1
transcription termination	1
aggresome-like inclusion	1
prokaryotic ubiquitin-like protein pup	1
sfks	1
molecular mass	1
slf	1
remd	1
lbd	1
phosphate-buffered saline	1
membrane binding	1
ans	1
binding	1
pan1	1
intrinsic disorder proteins	1
extracellular matrix proteins	1
kinetic analysis	1
acidic activation domain	1
ciks	1
unique domain	1
chasm	1
curcumin	1
id	1
nab3	1
ubiquitin	1
protein dynamic	1
oligomer	1
ribosome	1
dynamic allostery	1
sic1	1
structural biology	1
slac	1
n-alphas	1
groel	1
prospect hill virus	1
tnf receptor associated factor 3 interacting protein 2	1
drm	1
r(g)	1
fubar	1
pre-mrna splicing	1
antibody binding	1
protein interaction network	1
nih	1
ubc9 fusion-directed sumoylation	1
dimethyl sulfoxide	1
assignment	1
rna-binding protein	1
radius of gyration	1
aggregation	1
sopb	1
mathematical model	1
cytochrome c	1
cell signaling	1
his50	1
neighbor-joining	1
flanking fuzziness	1
sumo	1
folding upon binding	1
charge residue	1
secondary structure	1
database	1
tata-binding protein	1
tht	1
rhodococcus equi	1
mecp2	1
protease	1
more	1
target protein	1
helix unwinding	1
induced folding	1
nonsynonymous/synonymous substitution rate ratio	1
green fluorescent protein	1
sas-5	1
sas-6	1
ultraspiracle	1
national institutes of health	1
lc8	1
quantum yield	1
net charge	1
human	1
sufu	1
nonuniform sampling	1
ng	1
immune defense	1
microtubule	1
polyvinyl pyrollidone	1
tocsy	1
ftsz	1
thermodynamics	1
pctp-l	1
rate constants	1
ubiquitin interacting motif	1
vapd	1
protein interaction networks	1
lipid-binding protein	1
bovine serum albumin	1
dna binding	1
becn1	1
transcription elongation factors	1
metal ions	1
rna	1
ferritin	1
calcium intracellular release	1
ribonucleotide reductase	1
ufds	1
biofilm	1
bcl2	1
smfret	1
epr spectroscopy	1
mdmx-s	1
beta-amyloid	1
atg3	1
valosin containing protein	1
acetylcholinesterase	1
flexibility	1
type va secretion	1
bph	1
protein-dna interaction	1
membrane lipid raft	1
elastin-binding protein	1
glycoprotein	1
dn/ds	1
ion evaporation	1
protein deacetylation	1
library	1
single-stranded dna binding protein	1
permeabilization	1
transport	1
2d	1
tyrosine phosphorylation	1
prostatic intraepithelial neoplasia	1
tubulin tyrosine ligase	1
antigenic domain	1
zinc knuckle	1
store-operated calcium entry	1
protein engineering	1
tc-1	1
traf6	1
saxs	1
s12	1
phosphatidylinositol signaling	1
asymmetrical flow field-flow fractionation	1
inositol hexakisphosphate	1
random coil	1
endoplasmic reticulum stress	1
poly-bivalent scaffold	1
cordon-bleu	1
proteolysis assay	1
holdase	1
src	1
force field	1
chol	1
structure elucidation	1
simulation	1
hinge	1
s. pombe	1
20-hydroxyecdysone	1
traf3ip2	1
idrs	1
selective receptor modulators (srms)	1
glutamate receptors ionotropic (ampa, nmda)	1
protein-ligand interaction	1
nuclear magnetic resonance spectroscopy	1
calcium binding protein	1
mic2	1
nutritional stress	1
2,2,2-trifluoroethanol	1
multivalency	1
plasma membrane	1
recombinant gst-gra2-sag1a	1
replica exchange molecular dynamics	1
prion replication	1
cell division	1
elastin	1
bsa	1
marcks	1
circular dichroism (cd)	1
gfp	1
redox	1
trp channels	1
p21-activated kinases (paks)	1
baffr	1
inept	1
size-exclusion chromatography	1
1-palmitoyl-2-oleoyl-sn-glycero-3-phosphocholine	1
directed evolution	1
heat	1
vire2	1
drosophila melanogaster	1
mice	1
peptide arrays	1
nuclear pore	1
phosphoproteins	1
myelin structure	1
shematrin	1
cystathionine-beta-synthase (cbs)-domains	1
mechano-transduction	1
cooperativity	1
myristoylation	1
rnai	1
casein kinase 2 (ck2)	1
ultraspiracle protein	1
unfolding	1
protein expression	1
ttss	1
cbd	1
ataxin-3	1
pia	1
hlh	1
deer	1
inositol phosphate	1
tryptophan fluorescence quenching	1
polyproline ii	1
molecular weight	1
tooth	1
thioredoxin	1
ameloblastin	1
nj	1
polymer theory	1
human cell lysates	1
tir	1
thermolysin	1
immune receptor	1
intrinsic disordered protein	1
nr	1
multiple sclerosis	1
conformational sampling	1
n-terminal alpha-synuclein (1-25)	1
phosphatidylethanolamine	1
ssdna	1
interactome	1
multi-angle light scattering	1
nucleoporins	1
amyloidosis	1
truncated form of human cathepsin f (pro(126)-asp(484))	1
positive-strand rna viruses	1
fluorescence	1
mitochondria	1
gapdh	1
grp94	1
sef/interleukin 17 receptor	1
angiogenesis	1
lung cancer	1
rhoptry protein	1
neurological disorders	1

## Sheet: MeSH
MeSH Term	Number of Occurrences
Entries with no MeSH terms	80
humans	1010
amino acid sequence	923
molecular sequence data	897
protein structure, tertiary	688
models, molecular	673
animals	668
protein binding	634
protein conformation	634
protein structure, secondary	541
binding sites	441
circular dichroism	421
protein folding	361
crystallography, x-ray	309
nuclear magnetic resonance, biomolecular	287
recombinant proteins	287
magnetic resonance spectroscopy	251
escherichia coli	225
sequence homology, amino acid	206
alpha-synuclein	200
mice	194
kinetics	184
sequence alignment	167
peptide fragments	164
phosphorylation	158
mutation	148
dna-binding proteins	138
*protein folding	133
thermodynamics	129
peptides	127
bacterial proteins	127
structure-activity relationship	126
amino acid motifs	125
dna	114
base sequence	114
protein denaturation	113
dimerization	107
temperature	106
transcription factors	106
mutagenesis, site-directed	101
proteins	99
solutions	97
hydrogen-ion concentration	94
nerve tissue proteins	94
protein structure, quaternary	92
carrier proteins	90
saccharomyces cerevisiae	87
saccharomyces cerevisiae proteins	84
spectrometry, fluorescence	83
nuclear proteins	82
cloning, molecular	81
membrane proteins	80
rats	80
amyloid	77
recombinant fusion proteins	77
substrate specificity	76
calcium	74
hydrogen bonding	74
ligands	72
static electricity	70
*protein conformation	69
signal transduction	68
cattle	67
conserved sequence	67
intrinsically disordered proteins	66
computer simulation	65
cell membrane	65
x-ray diffraction	65
molecular dynamics simulation	65
escherichia coli proteins	64
models, biological	64
parkinson disease	63
tau proteins	63
electrophoresis, polyacrylamide gel	62
chromatography, gel	62
tumor suppressor protein p53	62
crystallization	61
amino acid substitution	60
phosphoproteins	59
hydrophobic and hydrophilic interactions	59
protein isoforms	58
protein multimerization	58
*models, molecular	58
computational biology	57
time factors	55
plant proteins	54
protein interaction domains and motifs	54
viral proteins	54
molecular weight	54
macromolecular substances	50
protein stability	49
cell line	47
molecular chaperones	47
spectroscopy, fourier transform infrared	47
mass spectrometry	46
water	45
alzheimer disease	44
amyloid beta-peptides	44
*protein structure, secondary	43
calorimetry	43
protein transport	43
scattering, radiation	42
protein subunits	41
molecular structure	41
microscopy, atomic force	41
nucleic acid conformation	41
oxidation-reduction	41
rna-binding proteins	41
fungal proteins	40
repressor proteins	40
synucleins	39
catalytic domain	39
plasmids	39
transcription, genetic	38
zinc	38
scattering, small angle	37
sequence deletion	37
dna primers	37
fluorescence resonance energy transfer	36
amino acids	36
protein interaction mapping	36
catalysis	35
trans-activators	35
ultracentrifugation	35
solubility	34
tyrosine	34
disulfides	34
histones	34
myelin basic protein	34
protein processing, post-translational	34
hydrolysis	34
hela cells	34
calmodulin	33
trifluoroethanol	33
microscopy, electron	33
proto-oncogene proteins	33
allosteric regulation	33
tryptophan	33
in vitro techniques	33
cytoplasm	33
cell line, tumor	33
adaptor proteins, signal transducing	32
drosophila proteins	32
mutant proteins	31
multiprotein complexes	31
drosophila melanogaster	31
enzyme activation	30
surface plasmon resonance	30
spectrophotometry, ultraviolet	30
prions	30
mutagenesis	29
blotting, western	29
molecular conformation	29
male	29
*nuclear magnetic resonance, biomolecular	29
*protein structure, tertiary	29
*molecular dynamics simulation	29
trypsin	28
sequence analysis, protein	28
actins	28
phylogeny	28
light	28
calcium-binding proteins	28
rabbits	28
creb-binding protein	27
algorithms	27
solvents	27
apoptosis	27
proline	27
transcriptional activation	27
cell cycle proteins	27
protein-serine-threonine kinases	27
transfection	27
protein precursors	26
adenosine triphosphate	26
brain	26
heat-shock proteins	26
copper	26
arabidopsis	26
micelles	26
arabidopsis proteins	26
female	26
nucleoproteins	25
models, chemical	25
spectrometry, mass, matrix-assisted laser desorption-ionization	25
hot temperature	25
gene expression	25
*escherichia coli proteins	24
protozoan proteins	24
sodium dodecyl sulfate	24
cysteine	24
spectrometry, mass, electrospray ionization	24
point mutation	24
protein unfolding	24
enzyme inhibitors	23
promoter regions, genetic	23
nitrogen isotopes	23
hek293 cells	23
cells, cultured	23
dose-response relationship, drug	23
microscopy, electron, transmission	23
caseins	22
chickens	22
neoplasm proteins	22
rna	22
phospholipids	22
viral nonstructural proteins	22
biophysics	22
intracellular signaling peptides and proteins	22
lipid bilayers	22
entropy	21
fluorescent dyes	21
microfilament proteins	21
*transcriptional activation	21
evolution, molecular	21
protein kinases	21
electron spin resonance spectroscopy	21
*protein multimerization	21
adenosine triphosphatases	21
rna, messenger	20
urea	20
glycosylation	20
proteasome endopeptidase complex	20
proto-oncogene proteins c-mdm2	20
serine	20
neurodegenerative diseases	19
cytoskeletal proteins	19
microtubules	19
neurons	19
cos cells	19
cyclin-dependent kinase inhibitor p27	19
colicins	19
*saccharomyces cerevisiae proteins	18
pliability	18
muscle proteins	18
sequence analysis, dna	18
cercopithecus aethiops	18
ribosomal proteins	18
chromatin	18
surface properties	18
thiazoles	18
spectrum analysis	18
ubiquitin-protein ligases	18
lysine	18
arginine	18
osmolar concentration	18
chromatography, high pressure liquid	17
carbon isotopes	17
magnesium	17
hydrogen	17
ubiquitin	17
crystallography	17
isoenzymes	17
hiv-1	17
antibodies, monoclonal	17
neoplasms	17
mutation, missense	17
apoproteins	17
cell nucleus	17
microscopy, fluorescence	17
guanosine triphosphate	16
thymosin	16
tumor suppressor proteins	16
guanidine	16
dna mutational analysis	16
gene expression regulation	16
dna, complementary	16
src homology domains	16
alanine	16
fluorescence	16
phosphoprotein phosphatases	16
receptors, cell surface	16
calorimetry, differential scanning	16
repetitive sequences, amino acid	15
glutathione transferase	15
liposomes	15
antigens, protozoan	15
two-hybrid system techniques	15
methylamines	15
binding, competitive	15
epitopes	15
oligopeptides	15
cross-linking reagents	15
rna, viral	15
measles virus	14
enzyme stability	14
phenotype	14
genetic vectors	14
*models, chemical	14
biophysical phenomena	14
swine	14
cyclin-dependent kinase 2	14
hepacivirus	14
nucleosomes	14
receptors, glucocorticoid	14
*evolution, molecular	14
*protein processing, post-translational	14
*thermodynamics	14
cyclic amp-dependent protein kinases	14
lewy bodies	14
xenopus laevis	14
gtp phosphohydrolases	14
glycine	14
dna repair	13
ribonucleoproteins	13
aspartic acid	13
reproducibility of results	13
dna, single-stranded	13
multienzyme complexes	13
guanosine diphosphate	13
lipids	13
tata-box binding protein	13
cell division	13
beta catenin	13
detergents	13
software	13
microtubule-associated proteins	13
proteolysis	13
apoptosis regulatory proteins	12
plasmodium falciparum	12
threonine	12
chromatography, affinity	12
structural homology, protein	12
*mutation	12
mycobacterium tuberculosis	12
acetylation	12
databases, protein	12
dna topoisomerases, type i	12
papillomavirus e7 proteins	12
spectrophotometry	12
sodium chloride	12
alternative splicing	12
protein engineering	12
gene deletion	12
nuclear pore complex proteins	12
gamma-synuclein	12
protons	12
ions	12
fluorescence polarization	12
ultraviolet rays	12
diffusion	12
plants	12
cyclin-dependent kinase inhibitor p21	12
x-rays	12
models, genetic	12
spectrum analysis, raman	12
bacterial toxins	12
mitochondria	12
bacterial outer membrane proteins	11
iron	11
phosphotransferases (alcohol group acceptor)	11
computer graphics	11
hydrodynamics	11
receptors, cytoplasmic and nuclear	11
bacillus subtilis	11
bacteria	11
cluster analysis	11
endoribonucleases	11
virus replication	11
cyclins	11
tubulin	11
xenopus	11
glutamic acid	11
neurofibrillary tangles	11
*micelles	11
cations, divalent	11
cell cycle	11
islet amyloid polypeptide	11
genetic variation	11
proto-oncogene proteins c-myc	11
glycoproteins	11
gtp-binding proteins	11
genes, reporter	11
polymerase chain reaction	11
cyclic amp response element-binding protein	11
gene expression regulation, bacterial	11
seeds	11
actin cytoskeleton	11
immunoblotting	11
*signal transduction	11
high mobility group proteins	10
archaeal proteins	10
proteomics	10
stress, physiological	10
*magnetic resonance spectroscopy	10
glyceraldehyde-3-phosphate dehydrogenases	10
cyclin-dependent kinases	10
spin labels	10
oligodeoxyribonucleotides	10
serine endopeptidases	10
amides	10
monte carlo method	10
proto-oncogene proteins c-bcl-2	10
staphylococcus aureus	10
phosphatidylcholines	10
histidine	10
genetic complementation test	10
oncogene proteins, viral	10
enzyme-linked immunosorbent assay	10
metals	10
ubiquitins	10
*intracellular signaling peptides and proteins	10
*protein interaction domains and motifs	10
*gene expression regulation	10
calcium carbonate	9
hsp70 heat-shock proteins	9
antineoplastic agents	9
cyclin-dependent kinase inhibitor proteins	9
sensitivity and specificity	9
membrane lipids	9
cyclin a	9
*transcription, genetic	9
rna interference	9
deuterium exchange measurement	9
thioredoxins	9
*apoptosis	9
tropomyosin	9
gene expression regulation, plant	9
anisotropy	9
muscles	9
osteopontin	9
calpain	9
*computer simulation	9
connectin	9
protein phosphatase 1	9
oocytes	9
thermus thermophilus	9
endopeptidases	9
immunohistochemistry	9
hsp90 heat-shock proteins	9
cell survival	9
methionine	9
crystallins	9
dna, bacterial	9
green fluorescent proteins	9
beta-synuclein	9
cricetinae	9
reverse transcriptase polymerase chain reaction	8
dyneins	8
drug design	8
oxygen	8
protein biosynthesis	8
muramidase	8
dogs	8
dna, viral	8
ribonucleotide reductases	8
glutamine	8
protein sorting signals	8
connexin 43	8
porins	8
mitochondrial proteins	8
nf-kappa b	8
nerve growth factors	8
rna, small interfering	8
oligodendroglia	8
homeodomain proteins	8
phosphorylcholine	8
amyloid beta-protein precursor	8
phosphates	8
cystic fibrosis transmembrane conductance regulator	8
models, statistical	8
motion	8
receptors, steroid	8
muscle, skeletal	8
antibodies	8
*protein structure, quaternary	8
drosophila	8
immunoprecipitation	8
adhesins, bacterial	8
biological transport	8
active transport, cell nucleus	8
catechin	8
endopeptidase k	8
endoplasmic reticulum	8
anilino naphthalenesulfonates	8
peptide mapping	8
adenosine diphosphate	8
lipid metabolism	8
cell proliferation	8
manganese	8
rna polymerase ii	8
peptide hydrolases	8
bordetella pertussis	8
consensus sequence	8
peptide termination factors	8
multigene family	8
basic-leucine zipper transcription factors	8
phenylalanine	8
photosystem ii protein complex	8
cytosol	7
tumor cells, cultured	7
biotin	7
retinoblastoma protein	7
tat gene products, human immunodeficiency virus	7
chlamydomonas reinhardtii	7
*vesicular transport proteins	7
electron transport complex iv	7
stereoisomerism	7
dna, fungal	7
membrane glycoproteins	7
methylation	7
*transcription factors	7
microscopy, confocal	7
yeasts	7
tandem mass spectrometry	7
chromatography, ion exchange	7
*dna-binding proteins	7
papillomaviridae	7
cyclic amp	7
spectrophotometry, infrared	7
blood proteins	7
electrophoresis, gel, two-dimensional	7
principal component analysis	7
buffers	7
fibronectins	7
schizosaccharomyces	7
dna helicases	7
polymers	7
wnt proteins	7
autophagy	7
asparagine	7
nuclear pore	7
nad	7
leucine	7
chymotrypsin	7
nadp	7
sequence homology	7
deuterium	7
allosteric site	7
gene expression regulation, fungal	7
middle aged	7
anions	6
sucrose	6
rna helicases	6
*protein interaction mapping	6
glucose	6
*dna repair	6
unilamellar liposomes	6
gene expression regulation, developmental	6
*protein engineering	6
ribosomes	6
dopamine	6
*zinc fingers	6
isotope labeling	6
heparin	6
viral regulatory and accessory proteins	6
cell adhesion	6
species specificity	6
rap gtp-binding proteins	6
hemolysin proteins	6
salts	6
glycogen synthase kinase 3	6
nuclear receptor coactivator 3	6
staining and labeling	6
immunoglobulin fab fragments	6
papillomavirus infections	6
cation transport proteins	6
viral core proteins	6
biopolymers	6
luminescent proteins	6
histone acetyltransferases	6
casein kinase ii	6
saposins	6
testis	6
chromosomal proteins, non-histone	6
nuclear receptor coactivator 1	6
dna replication	6
chaperonin 10	6
rna splicing	6
cell transformation, neoplastic	6
adsorption	6
nucleocapsid proteins	6
phosphatidylglycerols	6
glycerol	6
protein interaction maps	6
*trans-activators	6
proline-rich protein domains	6
f-box proteins	6
*nuclear proteins	6
protein-tyrosine kinases	6
calmodulin-binding proteins	6
calcineurin	6
*src homology domains	6
*gene expression regulation, plant	6
adult	6
tauopathies	6
eukaryotic cells	6
response elements	6
ras proteins	6
models, structural	6
aged	6
s100 proteins	6
adaptor proteins, vesicular transport	6
capsid	6
ubiquitination	6
regulatory sequences, nucleic acid	6
rna, bacterial	6
restriction mapping	6
receptors, antigen, t-cell	6
gene expression regulation, neoplastic	6
basic helix-loop-helix transcription factors	6
elasticity	6
vibrio	6
electrons	6
capsid proteins	6
adenylate cyclase toxin	6
chemistry, physical	6
cysteine endopeptidases	6
molecular mimicry	6
intracellular membranes	6
bacteriophage lambda	6
calcium chloride	6
snare proteins	6
methyl-cpg-binding protein 2	6
replication protein a	6
nih 3t3 cells	6
oxidative stress	6
cadherins	6
schizosaccharomyces pombe proteins	5
salmonella typhimurium	5
proto-oncogene proteins c-jun	5
gap junctions	5
pseudomonas aeruginosa	5
dead-box rna helicases	5
leucine zippers	5
aspartic acid endopeptidases	5
vesicular transport proteins	5
*hot temperature	5
hmga1a protein	5
*lipid metabolism	5
peptide library	5
octamer transcription factor-1	5
host cell factor c1	5
nacre	5
cold temperature	5
subtilisins	5
flavin mononucleotide	5
*models, biological	5
protease inhibitors	5
rna precursors	5
*crystallography, x-ray	5
fatty acids	5
flavonoids	5
*membranes, artificial	5
immediate-early proteins	5
oncogene proteins, fusion	5
antigens, neoplasm	5
hydrogen peroxide	5
peptides, cyclic	5
rna processing, post-transcriptional	5
i-kappa b proteins	5
erythrocytes	5
neutron diffraction	5
chaperonin 60	5
fibrinogen	5
photosynthesis	5
neurofilament proteins	5
p300-cbp transcription factors	5
pichia	5
herpes simplex virus protein vmw65	5
protein kinase c	5
microscopy, electron, scanning	5
*temperature	5
fluorescent antibody technique	5
sumo-1 protein	5
repetitive sequences, nucleic acid	5
*drosophila proteins	5
membrane transport proteins	5
epitope mapping	5
cell death	5
*amino acid motifs	5
polyribonucleotide nucleotidyltransferase	5
gene library	5
receptors, retinoic acid	5
recombination, genetic	5
metalloproteins	5
proto-oncogene protein c-ets-1	5
periplasm	5
*protein unfolding	5
mutagenesis, insertional	5
*point mutation	5
myocardium	5
amelogenin	5
connexins	5
muscle contraction	5
dna-directed rna polymerases	5
calcification, physiologic	5
physicochemical phenomena	5
chromatin assembly and disassembly	5
periplasmic proteins	5
plants, genetically modified	5
bone and bones	5
chloroplasts	5
insulin	5
sendai virus	5
inclusion bodies	5
luciferases	5
phosphopeptides	5
sulfhydryl compounds	5
proto-oncogene proteins c-raf	5
polyethylene glycols	5
antimicrobial cationic peptides	5
ryanodine receptor calcium release channel	5
cyclic nucleotide phosphodiesterases, type 6	5
src-family kinases	5
peptidylprolyl isomerase	5
sequence homology, nucleic acid	5
myosins	5
rats, sprague-dawley	5
zinc fingers	5
nickel	5
oxidants	5
*drug design	5
biological evolution	5
photosynthetic reaction center complex proteins	5
breast neoplasms	5
calibration	5
cytokines	4
calcium channels, l-type	4
cholesterol	4
cell movement	4
phosphotyrosine	4
prostatic neoplasms	4
receptors, androgen	4
rna, ribosomal	4
aging	4
proliferating cell nuclear antigen	4
eukaryotic initiation factor-4e	4
bcl-x protein	4
fluorometry	4
adenylate cyclase	4
rna-binding protein ews	4
*polymorphism, genetic	4
*molecular mimicry	4
receptors, immunologic	4
acrylamide	4
nerve degeneration	4
*protein binding	4
viscosity	4
pc12 cells	4
nucleocapsid	4
mollusca	4
thymine dna glycosylase	4
cell adhesion molecules, neuronal	4
isotopes	4
malaria vaccines	4
*gene expression regulation, neoplastic	4
adenoviridae	4
child	4
toxoplasma	4
small ubiquitin-related modifier proteins	4
phosphotransferases	4
biological markers	4
dna, superhelical	4
proto-oncogene proteins c-fos	4
*mutation, missense	4
receptors, n-methyl-d-aspartate	4
apoenzymes	4
grb2 adaptor protein	4
antigens, bacterial	4
cytoskeleton	4
porosity	4
peptide initiation factors	4
qa-snare proteins	4
ion channel gating	4
synapses	4
young adult	4
soybeans	4
bacteriocins	4
titrimetry	4
immunoglobulins	4
adp-ribosylation factors	4
deoxyribonuclease i	4
alkyl and aryl transferases	4
3' untranslated regions	4
methanol	4
n-acetylglucosaminyltransferases	4
gag gene products, human immunodeficiency virus	4
sheep	4
*molecular conformation	4
zonula occludens-1 protein	4
biophysical processes	4
signal recognition particle	4
potassium channels	4
selenoproteins	4
virulence factors	4
silent information regulator proteins, saccharomyces cerevisiae	4
*capsid proteins	4
r-snare proteins	4
brain chemistry	4
sigma factor	4
cell nucleolus	4
factor for inversion stimulation protein	4
sulfates	4
integration host factors	4
dna ligases	4
calcium-calmodulin-dependent protein kinases	4
s100 calcium binding protein beta subunit	4
exons	4
genes, bacterial	4
spodoptera	4
heme	4
rev gene products, human immunodeficiency virus	4
myristic acid	4
xenopus proteins	4
membrane potentials	4
prion diseases	4
receptor, epidermal growth factor	4
synaptic vesicles	4
mice, knockout	4
insect proteins	4
propanols	4
indoles	4
transcription factor rela	4
proto-oncogene proteins c-myb	4
s phase	4
lewy body disease	4
salivary proteins and peptides	4
hippocampus	4
troponin i	4
oxidoreductases	4
pyrophosphatases	4
ubiquitin-conjugating enzymes	4
thylakoids	4
troponin c	4
centrifugation, density gradient	4
adenomatous polyposis coli protein	4
autoantigens	4
myoglobin	4
mitosis	4
hypoxia-inducible factor 1, alpha subunit	4
adenosine monophosphate	4
potyvirus	4
cystine	4
transcription factors, tfii	4
nerve growth factor	4
17-hydroxysteroid dehydrogenases	4
stochastic processes	4
phosphoenolpyruvate carboxylase	4
zebrafish proteins	4
host-pathogen interactions	4
camptothecin	4
hiv infections	4
camels	4
protein kinase inhibitors	4
cytochrome c group	4
*neoplasm proteins	4
glutathione peroxidase	4
*conserved sequence	4
desiccation	4
sarcoplasmic reticulum	4
carbon-nitrogen ligases	4
heat-shock response	4
*photosynthesis	4
stathmin	4
clathrin	4
tobacco	4
dental enamel proteins	4
extracellular matrix proteins	4
antibodies, protozoan	4
zea mays	4
*photosystem ii protein complex	4
congo red	4
spinacia oleracea	4
hsp40 heat-shock proteins	4
estradiol	4
*bacterial proteins	4
adolescent	4
dextrans	4
mice, transgenic	4
sarcoma, ewing	4
particle size	4
transducin	4
helix-loop-helix motifs	4
neuroblastoma	4
e1a-associated p300 protein	4
*repetitive sequences, amino acid	4
acyl carrier protein	4
receptor protein-tyrosine kinases	4
alleles	3
cystic fibrosis	3
beta karyopherins	3
golgi apparatus	3
muscle, smooth	3
subcellular fractions	3
g1 phase	3
chlorides	3
naphthalenesulfonates	3
genomics	3
pepsin a	3
tropomodulin	3
*nerve tissue proteins	3
isoelectric point	3
histone deacetylases	3
*directed molecular evolution	3
endosomal sorting complexes required for transport	3
mice, inbred balb c	3
nad(p)h dehydrogenase (quinone)	3
cell adhesion molecules	3
antitoxins	3
bacteriophage p1	3
transforming growth factor beta	3
expressed sequence tags	3
thrombin	3
isoelectric focusing	3
phosphopyruvate hydratase	3
dopamine and camp-regulated phosphoprotein 32	3
thymus gland	3
*nucleic acid conformation	3
proto-oncogene proteins p21(ras)	3
acid anhydride hydrolases	3
collagen	3
high-throughput screening assays	3
central nervous system	3
viral structural proteins	3
ficoll	3
securin	3
metals, heavy	3
eye proteins	3
*carrier proteins	3
a kinase anchor proteins	3
growth substances	3
viral envelope proteins	3
isomerism	3
*helix-turn-helix motifs	3
nuclear localization signals	3
algal proteins	3
virus assembly	3
*proteome	3
receptors, progesterone	3
human papillomavirus 16	3
coenzymes	3
xeroderma pigmentosum group a protein	3
gene products, tat	3
*cdc2-cdc28 kinases	3
deinococcus	3
ion channels	3
milk	3
neuropeptides	3
drug discovery	3
*ubiquitination	3
rhodopsin	3
proto-oncogene protein c-fli-1	3
unfolded protein response	3
memory	3
henipavirus	3
methanococcus	3
alcohol oxidoreductases	3
proto-oncogene proteins c-abl	3
lipoproteins	3
yersinia pestis	3
troponin	3
octoxynol	3
lipopolysaccharides	3
serologic tests	3
nanostructures	3
oligonucleotides	3
transition temperature	3
tannins	3
astrocytes	3
immunity, innate	3
genome, fungal	3
precipitin tests	3
adenomatous polyposis coli	3
*operon	3
spermatozoa	3
animals, genetically modified	3
aluminum	3
receptors, estrogen	3
open reading frames	3
myelin sheath	3
acylation	3
zebrafish	3
mrna cleavage and polyadenylation factors	3
ankyrins	3
rna, fungal	3
biotinylation	3
herpesvirus 4, human	3
peptide biosynthesis	3
small molecule libraries	3
emulsions	3
recq helicases	3
flavin-adenine dinucleotide	3
homeostasis	3
surface-active agents	3
pesticides	3
genes, tumor suppressor	3
receptor, insulin	3
base pairing	3
polylysine	3
intercellular signaling peptides and proteins	3
lymphoid enhancer-binding factor 1	3
plant development	3
immunoglobulin fragments	3
cell cycle checkpoints	3
bacillus	3
*membrane proteins	3
biocatalysis	3
rna, transfer	3
operator regions, genetic	3
rab gtp-binding proteins	3
protein array analysis	3
*viral proteins	3
myeloid cell leukemia sequence 1 protein	3
horses	3
cyclophilins	3
siderophores	3
anticodon	3
chemokines, cc	3
wiskott-aldrich syndrome protein	3
polyamines	3
immunosuppressive agents	3
parvalbumins	3
immunoenzyme techniques	3
forkhead transcription factors	3
myosin subfragments	3
atrial natriuretic factor	3
*cell cycle	3
*adaptor proteins, vesicular transport	3
helminth proteins	3
intermediate filament proteins	3
phosphoserine	3
interferon regulatory factor-1	3
plant diseases	3
salivary proline-rich proteins	3
immunoglobulin g	3
epitopes, b-lymphocyte	3
n-acetylgalactosaminyltransferases	3
*ligands	3
guanosine 5'-o-(3-thiotriphosphate)	3
reference standards	3
*virus replication	3
antibody affinity	3
myelin proteins	3
electrophoretic mobility shift assay	3
drug resistance, neoplasm	3
nucleotides	3
*phylogeny	3
quail	3
brassicaceae	3
*nuclear localization signals	3
cell differentiation	3
pollen	3
peroxisomes	3
ankyrin repeat	3
skp cullin f-box protein ligases	3
*computational biology	3
valine	3
fibroblasts	3
qc-snare proteins	3
spectrin	3
caenorhabditis elegans	3
reactive oxygen species	3
indicators and reagents	3
natriuretic peptide, brain	3
viral fusion proteins	3
estradiol dehydrogenases	3
glutamate-ammonia ligase	3
*cell cycle proteins	3
hepatitis b virus	3
*adaptor proteins, signal transducing	3
caspases	3
*lac operon	3
amyloidosis	3
sheep diseases	3
gold	3
caspase 3	3
*entropy	3
cell line, transformed	3
milk proteins	3
plant roots	3
tetrahydrofolate dehydrogenase	3
parathyroid hormone	3
flavins	3
biosensing techniques	3
hormones	3
genome, viral	3
ribonucleoproteins, small nuclear	3
prostate	3
dna footprinting	3
synechocystis	3
*dna replication	3
cell aggregation	3
magnetic resonance imaging	3
semen	3
paramyxovirinae	3
transformation, bacterial	3
hsc70 heat-shock proteins	3
myeloid-lymphoid leukemia protein	3
phenols	3
cytoplasmic dyneins	3
dementia	3
lim domain proteins	3
base composition	3
tumor suppressor protein p14arf	3
antigens, viral	3
y-box-binding protein 1	3
exodeoxyribonucleases	3
turkeys	3
gene products, gag	3
inovirus	3
seminal vesicle secretory proteins	3
14-3-3 proteins	3
platelet glycoprotein gpiib-iiia complex	3
operon	3
chloroplast proteins	3
phosphoric monoester hydrolases	3
chromogranins	3
alpha-crystallins	3
*sequence deletion	3
proto-oncogene proteins c-akt	3
nanotechnology	3
endosomes	3
invertebrates	3
wiskott-aldrich syndrome protein, neuronal	3
vero cells	3
lung	3
receptors, somatotropin	3
tacrolimus binding proteins	3
*hydrophobic and hydrophilic interactions	3
serine-trna ligase	3
polymorphism, single nucleotide	3
receptors, nerve growth factor	3
permeability	3
osmotic pressure	3
rna caps	3
*light	3
molecular sequence annotation	3
*protein kinases	3
mice, inbred c57bl	2
bacillus anthracis	2
neurospora crassa	2
myogenic regulatory factors	2
telomere-binding proteins	2
*g-quadruplexes	2
rgs proteins	2
cell extracts	2
aminoisobutyric acids	2
serum response factor	2
neutrons	2
caulobacter crescentus	2
genes, fungal	2
chemical phenomena	2
musa	2
*circadian rhythm	2
cacodylic acid	2
carbonic anhydrases	2
glial cell line-derived neurotrophic factor	2
eukaryotic initiation factor-4g	2
kluyveromyces	2
sulfolobus	2
proteome	2
soybean proteins	2
fabaceae	2
serotyping	2
casein kinase i	2
pyridoxaminephosphate oxidase	2
heterotrimeric gtp-binding proteins	2
iron-sulfur proteins	2
serum albumin, bovine	2
trypanosoma cruzi	2
chromatography	2
dna-directed dna polymerase	2
silver	2
dna repair enzymes	2
sarcomeres	2
*adhesins, bacterial	2
tata box	2
uterine cervical neoplasms	2
*genes, p53	2
vimentin	2
receptors, laminin	2
thymidine monophosphate	2
bacillus cereus	2
quinazolines	2
geobacillus stearothermophilus	2
lampreys	2
gene products, rev	2
hiv antibodies	2
flagella	2
castor oil	2
spliceosomes	2
data collection	2
drug resistance	2
presynaptic terminals	2
hmgn proteins	2
plasmodium vivax	2
protamines	2
membranes	2
ustilago	2
paclitaxel	2
human growth hormone	2
nucleoplasmins	2
bromodeoxyuridine	2
adenine	2
models, theoretical	2
introns	2
aphthovirus	2
brain-derived neurotrophic factor	2
beta-lactamases	2
electrophoresis	2
mytilus	2
*inteins	2
sertoli cells	2
*leucine zippers	2
receptors, parathyroid hormone	2
phosphotransferases (nitrogenous group acceptor)	2
hsp27 heat-shock proteins	2
*bacterial adhesion	2
polyenes	2
*tata box	2
proteasome inhibitors	2
carbon	2
osteocalcin	2
heating	2
magnetics	2
cell fractionation	2
*alzheimer disease	2
exotoxins	2
protease nexins	2
aluminum compounds	2
diabetes mellitus, type 2	2
acyltransferases	2
creatine kinase	2
amyloidogenic proteins	2
biomimetic materials	2
myosin-light-chain phosphatase	2
transcription factor 7-like 2 protein	2
transcription factor chop	2
herpesvirus 1, human	2
monomeric gtp-binding proteins	2
dehydroepiandrosterone	2
camelids, new world	2
drug delivery systems	2
polytetrafluoroethylene	2
bacterial secretion systems	2
receptors, antigen, b-cell	2
jumonji domain-containing histone demethylases	2
viral vaccines	2
*cell proliferation	2
cricetulus	2
avian proteins	2
*periplasmic proteins	2
acetylcholinesterase	2
flow cytometry	2
baculoviridae	2
liver	2
cryptochromes	2
synchrotrons	2
phosphatidic acids	2
hordeum	2
chromatography, deae-cellulose	2
anti-infective agents	2
uridine diphosphate n-acetylglucosamine	2
immunodominant epitopes	2
thermolysin	2
*helix-loop-helix motifs	2
adenosine	2
triose-phosphate isomerase	2
axin protein	2
lactalbumin	2
hepatocyte growth factor	2
gram-positive bacteria	2
case-control studies	2
tandem repeat sequences	2
skin	2
laminin	2
*recombinant proteins	2
organ specificity	2
amyloid neuropathies	2
proto-oncogene proteins c-ret	2
paracoccus denitrificans	2
dna glycosylases	2
adhesiveness	2
gene expression regulation, viral	2
estrogen receptor beta	2
*operator regions, genetic	2
antigens, cd	2
dictyostelium	2
*calcium signaling	2
proto-oncogene proteins c-ets	2
inositol	2
toxoplasmosis	2
*mutagenesis, site-directed	2
cyclin e	2
otolithic membrane	2
pten phosphohydrolase	2
shaker superfamily of potassium channels	2
half-life	2
*cloning, molecular	2
chromatography, liquid	2
antigens, cd3	2
osmosis	2
hemagglutinin glycoproteins, influenza virus	2
glial fibrillary acidic protein	2
aconitate hydratase	2
protein tyrosine phosphatases	2
cold shock proteins and peptides	2
amidinotransferases	2
acetylglucosamine	2
hmga proteins	2
plant viral movement proteins	2
serotonin plasma membrane transport proteins	2
receptors, ldl	2
chemokines	2
carbon monoxide	2
acetone	2
histone chaperones	2
ribonucleoprotein, u5 small nuclear	2
gibberellins	2
nucleic acids	2
rhodospirillum rubrum	2
antineoplastic agents, hormonal	2
immunoglobulin heavy chains	2
genotype	2
type c phospholipases	2
pyrenes	2
dna restriction enzymes	2
bacteriophage t4	2
chorismate mutase	2
rna stability	2
talin	2
antimycin a	2
cell wall	2
atp-dependent proteases	2
tumor necrosis factor-alpha	2
*genetic variation	2
protein kinase c-alpha	2
telomere	2
elastic modulus	2
*hiv-1	2
*recombination, genetic	2
*tumor suppressor protein p53	2
oncogenes	2
*stress, physiological	2
integrases	2
neuroprotective agents	2
spindle apparatus	2
freezing	2
*alternative splicing	2
pinctada	2
disease models, animal	2
carbohydrate epimerases	2
proto-oncogene proteins pp60(c-src)	2
culture media	2
*rna-binding proteins	2
*muscle proteins	2
*microtubule proteins	2
dna topoisomerases, type ii	2
*genes	2
salt-tolerance	2
retinal rod photoreceptor cells	2
thermotoga maritima	2
*heat-shock proteins	2
apolipoproteins e	2
immunoglobulin variable region	2
beta 2-microglobulin	2
*cell transformation, neoplastic	2
data mining	2
measles	2
ferredoxins	2
drug combinations	2
*protein-serine-threonine kinases	2
antineoplastic agents, phytogenic	2
thermoplasma	2
cytidine deaminase	2
malaria, vivax	2
haplorhini	2
ppar gamma	2
cho cells	2
ribonucleases	2
superoxide dismutase	2
estrogen receptor alpha	2
dehydration	2
patch-clamp techniques	2
glial cell line-derived neurotrophic factor receptors	2
iron chelating agents	2
nuclear receptor coactivators	2
aeropyrum	2
intracellular fluid	2
triticum	2
cytoplasmic vesicles	2
hypoxia-inducible factor 1	2
durapatite	2
receptors, atrial natriuretic factor	2
calsequestrin	2
beta-galactosidase	2
*fluorescence resonance energy transfer	2
gelsolin	2
s-adenosylmethionine	2
*hydrogen-ion concentration	2
fluorine	2
ion transport	2
clusterin	2
databases as topic	2
clock proteins	2
maltose-binding proteins	2
flavoproteins	2
cyclin-dependent kinase 4	2
biochemistry	2
glycosaminoglycans	2
peas	2
endopeptidase clp	2
gene products, nef	2
chromosomes, bacterial	2
tissue distribution	2
prpc proteins	2
dental enamel	2
polyproteins	2
thymidine kinase	2
frameshift mutation	2
tropoelastin	2
micrornas	2
myosin type ii	2
deoxyribonucleases, type ii site-specific	2
down-regulation	2
embryo, mammalian	2
adaptation, physiological	2
movement	2
malaria	2
enhancer elements, genetic	2
desmin	2
potassium chloride	2
abscisic acid	2
*i-kappa b proteins	2
rna, double-stranded	2
3t3 cells	2
*multigene family	2
hepatitis b surface antigens	2
endocytosis	2
gene silencing	2
*genome, viral	2
vif gene products, human immunodeficiency virus	2
oxadiazoles	2
neurofibrils	2
lipocalin 1	2
microbial viability	2
rna, ribosomal, 16s	2
clostridium perfringens	2
selenium	2
*membrane fluidity	2
interleukin-4	2
mosaic viruses	2
ribonucleoprotein, u2 small nuclear	2
polymorphism, genetic	2
rna, ribosomal, 23s	2
synaptic transmission	2
lac repressors	2
*protein stability	2
*cysteine	2
peptidyl transferases	2
ribose	2
mediator complex	2
yersinia	2
probability	2
septins	2
genes, synthetic	2
lamin type a	2
polyribosomes	2
metapneumovirus	2
uroporphyrinogen decarboxylase	2
polysaccharides	2
cyanobacteria	2
cortactin	2
luciferases, bacterial	2
extracellular matrix	2
cholic acids	2
chemotaxis	2
tacrolimus	2
carbon radioisotopes	2
*proteolysis	2
glycogen phosphorylase	2
pyridoxal phosphate	2
enterotoxins	2
mitogen-activated protein kinase 1	2
*gene expression	2
oligosaccharides	2
sulfotransferases	2
acetyl-coa carboxylase	2
rna, transfer, amino acyl	2
growth hormone	2
*bacterial outer membrane proteins	2
vertebrates	2
child, preschool	2
mixed function oxygenases	2
helix-turn-helix motifs	2
neoplasm invasiveness	2
genes	2
toll-like receptors	2
enzyme precursors	2
brca1 protein	2
wnt signaling pathway	2
ammonium sulfate	2
*allosteric regulation	2
oncogene proteins	2
karyopherins	2
xeroderma pigmentosum	2
mesocricetus	2
viral matrix proteins	2
interferon regulatory factor-3	2
argonaute proteins	2
synaptosomal-associated protein 25	2
troponin t	2
ribonuclease p	2
*response elements	2
chemistry	2
spectrometry, x-ray emission	2
simian virus 40	2
adenoviruses, human	2
dihydrotestosterone	2
drug synergism	2
sorbitol	2
ubiquinone	2
hydroxides	2
minerals	2
retinoid x receptors	2
hydroxysteroid dehydrogenases	2
methods	2
gene regulatory networks	2
*amino acid sequence	2
vibrio cholerae	2
receptors, notch	2
ornithine decarboxylase	2
dopaminergic neurons	2
isoleucine	2
muscle fibers, skeletal	2
phosphorylase phosphatase	2
potassium	2
anti-bacterial agents	2
sodium-hydrogen antiporter	2
alkaline phosphatase	2
nadh, nadph oxidoreductases	2
*immunotherapy	2
cyclin b	2
cytochromes	2
mutant chimeric proteins	2
vitis	2
genome	2
fishes	2
transcription factor tfiib	2
cobalt	2
proto-oncogene proteins c-fyn	2
fluorides	2
eukaryota	2
subtilisin	2
inflammation	2
rna, catalytic	2
bcl-associated death protein	2
heparitin sulfate	2
markov chains	2
*microscopy, atomic force	2
*surface plasmon resonance	2
adaptor protein complex 2	2
codon, terminator	2
thiamine pyrophosphate	2
microscopy, immunoelectron	2
galactosyltransferases	2
topoisomerase i inhibitors	2
lectins	2
dna methylation	2
prealbumin	2
calcium channels	2
receptors, peptide	2
biomechanical phenomena	2
transport vesicles	2
*membrane transport proteins	2
dna damage	2
armadillo domain proteins	2
estrone	2
prokaryotic cells	2
meiosis	2
carbazoles	2
*plant proteins	2
bayes theorem	2
drug resistance, bacterial	2
phospholipase c delta	2
benzophenones	2
*dna	2
tcf transcription factors	2
*prions	2
tritium	2
genes, p53	2
menkes kinky hair syndrome	2
trans-golgi network	2
schiff bases	2
rotation	2
cell lineage	2
trypsin inhibitors	2
crk-associated substrate protein	2
protein inhibitors of activated stat	2
chromogranin a	2
*protein denaturation	2
xenograft model antitumor assays	2
phosphatidylserines	2
*atp-binding cassette transporters	2
citrate (si)-synthase	2
wiskott-aldrich syndrome protein family	2
neurogranin	2
carboxylic acids	2
*amino acid substitution	2
anura	2
microfibrils	2
trpv cation channels	2
mice, scid	2
merozoites	2
aminoacyltransferases	2
spinal cord	2
integrins	2
dna probes	2
nf-kappa b p50 subunit	2
circadian rhythm	2
*scattering, small angle	2
polyhydroxyalkanoates	2
uganda	2
sialoglycoproteins	2
macrophage inflammatory proteins	2
peroxidase	2
*phosphoproteins	2
metal nanoparticles	2
glycosyltransferases	2
antiviral agents	2
proteostasis deficiencies	2
cyclic amp-dependent protein kinase rialpha subunit	2
membrane fusion	2
apolipoprotein a-i	2
dipeptides	2
sulfur	2
neoplasm metastasis	2
*genes, plant	2
proto-oncogene proteins c-crk	2
cucurbitaceae	2
glucosides	2
cell membrane permeability	2
ccaat-enhancer-binding proteins	2
gene expression profiling	2
genetic predisposition to disease	2
candida albicans	2
nf-e2-related factor 2	2
deoxyuracil nucleotides	2
glycine-trna ligase	2
*spin labels	2
sirtuins	2
*cytochrome b group	2
guinea pigs	2
transcription termination, genetic	2
sumoylation	2
spermine	2
g-box binding factors	2
gammaproteobacteria	2
*protein interaction maps	2
trypanosoma brucei brucei	2
carbohydrates	2
myristic acids	2
methyltransferases	2
lyases	2
protein splicing	2
imidazoles	2
hydroxamic acids	2
l-lactate dehydrogenase	2
*gene deletion	2
dystroglycans	2
nanoparticles	2
codon	2
placenta	2
neutrophils	2
adp-ribosylation factor 1	2
endonucleases	2
cdc42 gtp-binding protein	2
antibodies, antinuclear	2
trout	2
*catalytic domain	2
*protons	2
ubiquitin-protein ligase complexes	2
selenocysteine	2
enterohemorrhagic escherichia coli	2
chemokine ccl11	2
*virus assembly	2
cyclophilin a	2
rna cap-binding proteins	2
elastin	2
nephelometry and turbidimetry	2
peptide elongation factor g	2
cell compartmentation	2
tetradecanoylphorbol acetate	2
*repressor proteins	2
image processing, computer-assisted	2
*algorithms	2
alcohol dehydrogenase	2
tyrosine-trna ligase	2
chondroitin sulfates	1
transcription factor ap-1	1
reoviridae	1
sphingolipid activator proteins	1
moloney murine leukemia virus	1
norovirus	1
receptor, par-1	1
malondialdehyde	1
transcription factor ap-2	1
reducing agents	1
gene components	1
*cell cycle checkpoints	1
endocrine glands	1
lactoferrin	1
potyviridae	1
transcription factor tfiiia	1
nitrogen fixation	1
transformation, genetic	1
complement c1r	1
*flaviviridae	1
gene frequency	1
tumor markers, biological	1
rna, ribosomal, 18s	1
t-lymphocytes	1
*hendra virus	1
decorin	1
methane	1
gtp-binding protein alpha subunits, gi-go	1
guanidines	1
cytomegalovirus	1
feathers	1
ecdysterone	1
pseudomonas infections	1
filtration	1
immune sera	1
niacin	1
ubiquitin-activating enzymes	1
receptors, nicotinic	1
receptors, opioid, mu	1
*protein precursors	1
ethanol	1
plant viruses	1
collagen type vii	1
amino acids, aromatic	1
glycolipids	1
fusion proteins, bcr-abl	1
nfatc transcription factors	1
cystatins	1
gene-environment interaction	1
nuclear export signals	1
vaccines, synthetic	1
gpi-linked proteins	1
mycotoxins	1
periplasmic binding proteins	1
*gene expression regulation, viral	1
retinal diseases	1
cyclic amp receptor protein	1
receptors, scavenger	1
receptors, neuropeptide y	1
*parathyroid hormone-related protein	1
cerebrum	1
epigenesis, genetic	1
lipopeptides	1
*autophagy	1
india	1
nm23 nucleoside diphosphate kinases	1
rna cap analogs	1
mad2 proteins	1
nitriles	1
microfluidic analytical techniques	1
secretory vesicles	1
chemokine ccl4	1
sexual behavior, animal	1
herpesvirus 3, human	1
optical tweezers	1
alpha karyopherins	1
chromatin immunoprecipitation	1
grb10 adaptor protein	1
*mechanical processes	1
vicia	1
rifampin	1
fungi	1
*dimerization	1
isomerases	1
growth cones	1
*pyrones	1
transcriptome	1
*transfer rna aminoacylation	1
polysaccharide-lyases	1
*base pairing	1
citrates	1
mannheimia haemolytica	1
salmonella	1
quantitative structure-activity relationship	1
rad52 dna repair and recombination protein	1
amino acids, dicarboxylic	1
*glycine	1
sodium channels	1
*adaptation, physiological	1
cardiolipins	1
muscle relaxation	1
animal shells	1
e2f1 transcription factor	1
phosphatidylethanolamines	1
methanococcaceae	1
hiv core protein p24	1
antibody specificity	1
receptors, thrombopoietin	1
*dna damage	1
encephalitis	1
streptococcus pyogenes	1
amyotrophic lateral sclerosis	1
lilium	1
carboxypeptidases a	1
transcriptional elongation factors	1
genes, homeobox	1
drug stability	1
acetates	1
nitrophenols	1
cysteine proteinase inhibitors	1
leukemia, myelogenous, chronic, bcr-abl positive	1
*plant viruses	1
birefringence	1
mice, inbred nod	1
sos1 protein	1
aedes	1
body temperature	1
salt-tolerant plants	1
*cytoskeletal proteins	1
rubulavirus	1
*sequence homology, amino acid	1
*nerve growth factors	1
lactoglobulins	1
leukocytes, mononuclear	1
organophosphorus compounds	1
*genomics	1
utrophin	1
*protein sorting signals	1
steroids	1
genomic islands	1
hydrostatic pressure	1
carcinoma, non-small-cell lung	1
phosphoinositide phospholipase c	1
mercury	1
*transcription factors, tfii	1
hydroquinones	1
cathepsin f	1
axin signaling complex	1
dicumarol	1
republic of korea	1
progeria	1
antigens, cd36	1
mitochondrial membrane transport proteins	1
*monosaccharide transport proteins	1
cyclin-dependent kinase inhibitor p16	1
rett syndrome	1
jurkat cells	1
trehalose	1
tribolium	1
*guanine nucleotide exchange factors	1
ethanolamine	1
fluorine radioisotopes	1
p21-activated kinases	1
kinesin	1
fibrinolysin	1
receptors, gaba-b	1
meristem	1
arylsulfotransferase	1
estrogens	1
liquid crystals	1
*human papillomavirus 16	1
carbocyanines	1
rabies virus	1
nucleocytoplasmic transport proteins	1
coix	1
iron-binding proteins	1
pseudouridine	1
synovial membrane	1
aldehyde oxidoreductases	1
fatty acid synthases	1
insects	1
genetic therapy	1
host factor 1 protein	1
poly a	1
*drug resistance, multiple	1
alcohols	1
quinone reductases	1
hydroxyl radical	1
anilides	1
*terminator regions, genetic	1
chromosomes, human, x	1
amphibian proteins	1
cdc2-cdc28 kinases	1
tuberculosis	1
nucleic acid amplification techniques	1
*desiccation	1
methylococcus capsulatus	1
potassium acetate	1
clathrin-coated vesicles	1
sequence analysis	1
transcription factor tfiid	1
cholera toxin	1
synechococcus	1
endosperm	1
*tau proteins	1
stem cell transplantation	1
prophages	1
pyruvate dehydrogenase complex	1
hydro-lyases	1
mice, inbred cba	1
enzyme assays	1
*adaptor protein complex 3	1
samarium	1
focal adhesions	1
*chemistry, physical	1
neuroendocrine secretory protein 7b2	1
phosvitin	1
sp1 transcription factor	1
holoenzymes	1
receptors, autocrine motility factor	1
cartilage	1
respirovirus	1
momordica	1
basic helix-loop-helix leucine zipper transcription factors	1
checkpoint kinase 2	1
phenylalanine-trna ligase	1
*gene regulatory networks	1
fourier analysis	1
arginine kinase	1
utp-hexose-1-phosphate uridylyltransferase	1
*saccharomyces cerevisiae	1
carboxypeptidases	1
ethers	1
ribonucleoproteins, small nucleolar	1
root nodules, plant	1
*proteins	1
*mechanotransduction, cellular	1
up-regulation	1
escherichia coli o157	1
membrane microdomains	1
centrosome	1
nitrobenzenes	1
bone neoplasms	1
air	1
*protease la	1
*neurofibrillary tangles	1
*amyloidosis	1
*carbon-nitrogen ligases	1
secretory pathway	1
cell enlargement	1
*regulatory sequences, nucleic acid	1
trna methyltransferases	1
*homeodomain proteins	1
curcumin	1
rna, small nuclear	1
receptor, erbb-2	1
rna viruses	1
ant venoms	1
*neural networks (computer)	1
kinetochores	1
*drug delivery systems	1
chromosome mapping	1
rna, guide	1
cell size	1
enterococcus faecalis	1
brain diseases	1
cyclic gmp-dependent protein kinases	1
molting	1
sperm immobilizing agents	1
chemical precipitation	1
nucleoside deaminases	1
jnk mitogen-activated protein kinases	1
*cytokinesis	1
ribosome subunits, large, bacterial	1
guanylate kinase	1
respiratory syncytial virus, human	1
deoxyribodipyrimidine photo-lyase	1
osteonectin	1
kruppel-like transcription factors	1
cisplatin	1
chondrocytes	1
bromelains	1
silicon dioxide	1
vesicle-associated membrane protein 2	1
nucleic acid synthesis inhibitors	1
acetyltransferases	1
calcineurin inhibitors	1
alkylation	1
pyruvate dehydrogenase (lipoamide)	1
catechol oxidase	1
*repetitive sequences, nucleic acid	1
*binding sites, antibody	1
databases, genetic	1
parathyroid hormone-related protein	1
transient receptor potential channels	1
*heterogeneous-nuclear ribonucleoprotein group a-b	1
serum amyloid a protein	1
analysis of variance	1
binding sites, antibody	1
orotic acid	1
cathelicidins	1
free radical scavengers	1
glutamates	1
ice	1
hydroxyurea	1
microfluidics	1
sinorhizobium meliloti	1
endoplasmic reticulum stress	1
pectinidae	1
molecular imaging	1
[truncated: 1,213 more rows]
